# Supplementary material for: Cephalotaxine-type and homoerythrina-type alkaloids with antiproliferative effects from Cephalotaxus fortunei
Source: Royal Society of Chemistry journal article supplement (doi:10.1039/d2ob01242a), 2022-01-01
Supplement: d2ob01242a1.pdf [file d2ob01242a1.pdf]

## Supporting information for

# Cephalotaxine-type and homoerythrina-type alkaloids with antiproliferative effects from *Cephalotaxus fortunei*

Chun-Xue Zhao <sup>a</sup>, Hui Liu <sup>b</sup>, Xin Zhang <sup>a</sup>, Meng-Yue Yang <sup>a</sup>, Yue-Tong Wang <sup>b</sup>, Yi-Jia Xing <sup>a</sup>,  
Jun-Xin Hua <sup>a</sup>, Qin Zhang <sup>a</sup>, Da-Hong Li <sup>a</sup>, Jiao Bai <sup>\*, a</sup>, Yong-Kui Jing <sup>\*, b</sup>, Hui-Ming Hua <sup>\*, a</sup>

<sup>a</sup> Key Laboratory of Structure-Based Drug Design & Discovery, Ministry of Education, Shenyang  
Pharmaceutical University, Shenyang 110016, PR China

<sup>b</sup> Wuya College of Innovation, Shenyang Pharmaceutical University, Shenyang 110016, PR China

\*Corresponding author.

*E-mail address:* huimhua@163.com (Hui-Ming Hua); jingyk@syphu.edu.cn (Yong-Kui Jing);  
baijiao@hotmail.com (Jiao Bai)

## Content

|                                                                                                                             |    |
|-----------------------------------------------------------------------------------------------------------------------------|----|
| General experimental procedures .....                                                                                       | 5  |
| Plant material .....                                                                                                        | 5  |
| Extraction and isolation .....                                                                                              | 5  |
| Spectroscopic data of compounds .....                                                                                       | 8  |
| Single-crystal X-ray crystallographic analysis .....                                                                        | 9  |
| Computational methods .....                                                                                                 | 9  |
| Antitumor activity assay .....                                                                                              | 10 |
| Figure S1. HRESIMS spectrum of <b>1</b> .....                                                                               | 11 |
| Figure S2. UV spectrum of <b>1</b> .....                                                                                    | 11 |
| Figure S3. Experimental ECD spectrum of <b>1</b> .....                                                                      | 12 |
| Figure S4. <sup>1</sup> H NMR spectrum of compound <b>1</b> (600 MHz, DMSO- <i>d</i> <sub>6</sub> ) .....                   | 12 |
| Figure S5. <sup>13</sup> C NMR spectrum of compound <b>1</b> (150 MHz, DMSO- <i>d</i> <sub>6</sub> ) .....                  | 13 |
| Figure S6. HSQC spectrum of compound <b>1</b> (600 MHz, DMSO- <i>d</i> <sub>6</sub> ) .....                                 | 13 |
| Figure S7. <sup>1</sup> H- <sup>1</sup> H COSY spectrum of compound <b>1</b> (600 MHz, DMSO- <i>d</i> <sub>6</sub> ) .....  | 14 |
| Figure S8. HMBC spectrum of compound <b>1</b> (600 MHz, DMSO- <i>d</i> <sub>6</sub> ) .....                                 | 14 |
| Figure S9. NOESY spectrum of compound <b>1</b> (600 MHz, DMSO- <i>d</i> <sub>6</sub> ) .....                                | 15 |
| Figure S10. HRESIMS spectrum of <b>2</b> .....                                                                              | 15 |
| Figure S11. UV spectrum of <b>2</b> .....                                                                                   | 16 |
| Figure S12. Experimental ECD spectrum of <b>2</b> .....                                                                     | 16 |
| Figure S13. <sup>1</sup> H NMR spectrum of compound <b>2</b> (600 MHz, DMSO- <i>d</i> <sub>6</sub> ) .....                  | 17 |
| Figure S14. <sup>13</sup> C NMR spectrum of compound <b>2</b> (150 MHz, DMSO- <i>d</i> <sub>6</sub> ) .....                 | 17 |
| Figure S15. HSQC spectrum of compound <b>2</b> (600 MHz, DMSO- <i>d</i> <sub>6</sub> ) .....                                | 18 |
| Figure S16. <sup>1</sup> H- <sup>1</sup> H COSY spectrum of compound <b>2</b> (600 MHz, DMSO- <i>d</i> <sub>6</sub> ) ..... | 18 |
| Figure S17. HMBC spectrum of compound <b>2</b> (600 MHz, DMSO- <i>d</i> <sub>6</sub> ) .....                                | 19 |
| Figure S18. NOESY spectrum of compound <b>2</b> (600 MHz, DMSO- <i>d</i> <sub>6</sub> ) .....                               | 19 |
| Figure S19. HRESIMS spectrum of <b>3</b> .....                                                                              | 20 |
| Figure S20. UV spectrum of <b>3</b> .....                                                                                   | 20 |
| Figure S21. Experimental ECD spectrum of <b>3</b> .....                                                                     | 21 |
| Figure S22. <sup>1</sup> H NMR spectrum of compound <b>3</b> (600 MHz, DMSO- <i>d</i> <sub>6</sub> ) .....                  | 21 |
| Figure S23. <sup>13</sup> C NMR spectrum of compound <b>3</b> (150 MHz, DMSO- <i>d</i> <sub>6</sub> ) .....                 | 22 |
| Figure S24. HSQC spectrum of compound <b>3</b> (600 MHz, DMSO- <i>d</i> <sub>6</sub> ) .....                                | 22 |
| Figure S25. <sup>1</sup> H- <sup>1</sup> H COSY spectrum of compound <b>3</b> (600 MHz, DMSO- <i>d</i> <sub>6</sub> ) ..... | 23 |
| Figure S26. HMBC spectrum of compound <b>3</b> (600 MHz, DMSO- <i>d</i> <sub>6</sub> ) .....                                | 23 |
| Figure S27. NOESY spectrum of compound <b>3</b> (600 MHz, DMSO- <i>d</i> <sub>6</sub> ) .....                               | 24 |
| Figure S28. ORTEP drawing of compound <b>6</b> .....                                                                        | 25 |
| Figure S29. HRESIMS spectrum of <b>6</b> .....                                                                              | 25 |
| Figure S30. <sup>1</sup> H NMR spectrum of compound <b>6</b> (600 MHz, DMSO- <i>d</i> <sub>6</sub> ) .....                  | 26 |
| Figure S31. <sup>13</sup> C NMR spectrum of compound <b>6</b> (600 MHz, DMSO- <i>d</i> <sub>6</sub> ) .....                 | 26 |
| Figure S32. HSQC spectrum of compound <b>6</b> .....                                                                        | 27 |
| Figure S33. HRESIMS spectrum of <b>11</b> .....                                                                             | 28 |
| Figure S34. UV spectrum of compound <b>11</b> .....                                                                         | 29 |

|                                                                                                                                     |    |
|-------------------------------------------------------------------------------------------------------------------------------------|----|
| <b>Figure S35.</b> Experimental ECD spectrum of <b>11</b> .....                                                                     | 29 |
| <b>Figure S36.</b> <sup>1</sup> H NMR spectrum of compound <b>11</b> (600 MHz, DMSO- <i>d</i> <sub>6</sub> ).....                   | 30 |
| <b>Figure S37.</b> <sup>13</sup> C NMR spectrum of compound <b>11</b> (150 MHz, DMSO- <i>d</i> <sub>6</sub> ).....                  | 30 |
| <b>Figure S38.</b> HSQC spectrum of compound <b>11</b> (600 MHz, DMSO- <i>d</i> <sub>6</sub> ) .....                                | 31 |
| <b>Figure S39.</b> <sup>1</sup> H- <sup>1</sup> H COSY spectrum of compound <b>11</b> (600 MHz, DMSO- <i>d</i> <sub>6</sub> ).....  | 31 |
| <b>Figure S40.</b> HMBC spectrum of compound <b>11</b> (600 MHz, DMSO- <i>d</i> <sub>6</sub> ) .....                                | 32 |
| <b>Figure S41.</b> NOESY spectrum of compound <b>11</b> (600 MHz, DMSO- <i>d</i> <sub>6</sub> ).....                                | 32 |
| <b>Figure S42.</b> HRESIMS spectrum of <b>13</b> .....                                                                              | 33 |
| <b>Figure S43.</b> UV spectrum of compound <b>13</b> .....                                                                          | 33 |
| <b>Figure S44.</b> Experimental ECD spectrum of <b>13</b> .....                                                                     | 34 |
| <b>Figure S45.</b> <sup>1</sup> H NMR spectrum of compound <b>13</b> (600 MHz, DMSO- <i>d</i> <sub>6</sub> ).....                   | 34 |
| <b>Figure S46.</b> <sup>13</sup> C NMR spectrum of compound <b>13</b> (150 MHz, DMSO- <i>d</i> <sub>6</sub> ).....                  | 35 |
| <b>Figure S47.</b> HSQC spectrum of compound <b>13</b> (600 MHz, DMSO- <i>d</i> <sub>6</sub> ) .....                                | 35 |
| <b>Figure S48.</b> <sup>1</sup> H- <sup>1</sup> H COSY spectrum of compound <b>13</b> (600 MHz, DMSO- <i>d</i> <sub>6</sub> ).....  | 36 |
| <b>Figure S49.</b> HMBC spectrum of compound <b>13</b> (600 MHz, DMSO- <i>d</i> <sub>6</sub> ) .....                                | 36 |
| <b>Figure S50.</b> NOESY spectrum of compound <b>13</b> (600 MHz, DMSO- <i>d</i> <sub>6</sub> ).....                                | 37 |
| <b>Figure S51.</b> ORTEP drawing of compound <b>13</b> .....                                                                        | 37 |
| <b>Figure S52.</b> HRESIMS data of <b>14</b> .....                                                                                  | 38 |
| <b>Figure S53.</b> UV spectrum of <b>14</b> .....                                                                                   | 38 |
| <b>Figure S54.</b> Experimental ECD spectrum of <b>14</b> .....                                                                     | 39 |
| <b>Figure S55.</b> <sup>1</sup> H NMR spectrum of compound <b>14</b> (CDCl <sub>3</sub> /CD <sub>3</sub> OD (4:1) at 310 K).....    | 39 |
| <b>Figure S56.</b> <sup>13</sup> C NMR spectrum of compound <b>14</b> (CDCl <sub>3</sub> /CD <sub>3</sub> OD (4:1) at 310 K).....   | 40 |
| <b>Figure S57.</b> <sup>1</sup> H NMR spectrum of compound <b>14</b> (600 MHz, DMSO- <i>d</i> <sub>6</sub> ).....                   | 40 |
| <b>Figure S58.</b> <sup>13</sup> C NMR spectrum of compound <b>14</b> (150 MHz, DMSO- <i>d</i> <sub>6</sub> ).....                  | 41 |
| <b>Figure S59.</b> HSQC spectrum of compound <b>14</b> (600 MHz, DMSO- <i>d</i> <sub>6</sub> ) .....                                | 41 |
| <b>Figure S60.</b> <sup>1</sup> H- <sup>1</sup> H COSY spectrum of compound <b>14</b> (600 MHz, DMSO- <i>d</i> <sub>6</sub> ).....  | 42 |
| <b>Figure S61.</b> HMBC spectrum of compound <b>14</b> (600 MHz, DMSO- <i>d</i> <sub>6</sub> ) .....                                | 42 |
| <b>Figure S62.</b> NOESY spectrum of compound <b>14</b> (600 MHz, DMSO- <i>d</i> <sub>6</sub> ).....                                | 43 |
| <b>Figure S63.</b> HRESIMS spectrum of <b>14a</b> .....                                                                             | 44 |
| <b>Figure S64.</b> UV spectrum of <b>14a</b> .....                                                                                  | 44 |
| <b>Figure S65.</b> Experimental ECD spectrum of <b>14a</b> .....                                                                    | 45 |
| <b>Figure S66.</b> <sup>1</sup> H NMR spectrum of compound <b>14a</b> (600 MHz, DMSO- <i>d</i> <sub>6</sub> ).....                  | 45 |
| <b>Figure S67.</b> <sup>13</sup> C NMR spectrum of compound <b>14a</b> (150 MHz, DMSO- <i>d</i> <sub>6</sub> ).....                 | 46 |
| <b>Figure S68.</b> HSQC spectrum of compound <b>14a</b> (600 MHz, DMSO- <i>d</i> <sub>6</sub> ) .....                               | 46 |
| <b>Figure S69.</b> <sup>1</sup> H- <sup>1</sup> H COSY spectrum of compound <b>14a</b> (600 MHz, DMSO- <i>d</i> <sub>6</sub> )..... | 47 |
| <b>Figure S70.</b> HMBC spectrum of compound <b>14a</b> (600 MHz, DMSO- <i>d</i> <sub>6</sub> ) .....                               | 47 |
| <b>Figure S71.</b> NOESY spectrum of compound <b>14a</b> (600 MHz, DMSO- <i>d</i> <sub>6</sub> ).....                               | 48 |
| <b>Figure S72.</b> The HPLC chromatogram of <b>14a</b> and <b>14</b> .....                                                          | 50 |
| <b>Figure S73.</b> HRESIMS spectrum of <b>15</b> .....                                                                              | 51 |
| <b>Figure S74.</b> UV spectrum of compound <b>15</b> .....                                                                          | 52 |
| <b>Figure S75.</b> Experimental ECD spectrum of <b>15</b> .....                                                                     | 52 |
| <b>Figure S76.</b> <sup>1</sup> H NMR spectrum of compound <b>15</b> (600 MHz, DMSO- <i>d</i> <sub>6</sub> ).....                   | 53 |
| <b>Figure S77.</b> <sup>13</sup> C NMR spectrum of compound <b>15</b> (150 MHz, DMSO- <i>d</i> <sub>6</sub> ).....                  | 53 |
| <b>Figure S78.</b> HSQC spectrum of compound <b>15</b> (600 MHz, DMSO- <i>d</i> <sub>6</sub> ) .....                                | 54 |

|                                                                                                                                                              |    |
|--------------------------------------------------------------------------------------------------------------------------------------------------------------|----|
| <b>Figure S79.</b> <sup>1</sup> H- <sup>1</sup> H COSY spectrum of compound <b>15</b> (600 MHz, DMSO- <i>d</i> <sub>6</sub> ).....                           | 54 |
| <b>Figure S80.</b> HMBC spectrum of compound <b>15</b> (600 MHz, DMSO- <i>d</i> <sub>6</sub> ) .....                                                         | 55 |
| <b>Figure S81.</b> NOESY spectrum of compound <b>15</b> (600 MHz, DMSO- <i>d</i> <sub>6</sub> ).....                                                         | 55 |
| <b>Figure S82.</b> HRESIMS spectrum of <b>17</b> .....                                                                                                       | 56 |
| <b>Figure S83.</b> UV spectrum of compound <b>17</b> .....                                                                                                   | 57 |
| <b>Figure S84.</b> Experimental ECD spectrum of <b>17</b> .....                                                                                              | 57 |
| <b>Figure S85.</b> Experimental and calculated ECD spectra of <b>17</b> , <b>17a</b> and <b>17b</b> .....                                                    | 58 |
| <b>Figure S86.</b> <sup>1</sup> H NMR spectrum of compound <b>17</b> (600 MHz, DMSO- <i>d</i> <sub>6</sub> ).....                                            | 58 |
| <b>Figure S87.</b> <sup>13</sup> C NMR spectrum of compound <b>17</b> (150 MHz, DMSO- <i>d</i> <sub>6</sub> ).....                                           | 59 |
| <b>Figure S88.</b> HSQC spectrum of compound <b>17</b> (600 MHz, DMSO- <i>d</i> <sub>6</sub> ) .....                                                         | 59 |
| <b>Figure S89.</b> <sup>1</sup> H- <sup>1</sup> H COSY spectrum of compound <b>17</b> (600 MHz, DMSO- <i>d</i> <sub>6</sub> ).....                           | 60 |
| <b>Figure S90.</b> HMBC spectrum of compound <b>17</b> (600 MHz, DMSO- <i>d</i> <sub>6</sub> ) .....                                                         | 60 |
| <b>Figure S91.</b> NOESY spectrum of compound <b>17</b> (600 MHz, DMSO- <i>d</i> <sub>6</sub> ).....                                                         | 61 |
| <b>Table S1.</b> X-ray crystallographic data for <b>1</b> .....                                                                                              | 62 |
| <b>Table S2.</b> X-ray crystallographic data for <b>6</b> .....                                                                                              | 63 |
| <b>Table S3.</b> X-ray crystallographic data for <b>13</b> .....                                                                                             | 64 |
| <b>Table S4.</b> <sup>1</sup> H NMR and <sup>13</sup> C NMR data of compounds <b>14a</b> and <b>14</b> (600 MHz, DMSO- <i>d</i> <sub>6</sub> ).....          | 65 |
| <b>Table S5.</b> <sup>1</sup> H NMR and <sup>13</sup> C NMR data of compounds <b>14a</b> and <b>14</b> (310 K CDCl <sub>3</sub> /CD <sub>3</sub> OD 4:1).... | 66 |
| <b>Table S6.</b> Original data on antiproliferative effects on THP-1 and K562 cells of <b>1-32</b> .....                                                     | 67 |
| <b>Figure S92.</b> Inhibitory curve on K562 cells and THP-1 cells of <b>1-32</b> .....                                                                       | 69 |

## General experimental procedures

The HRESIMS data were performed on the Bruker micro-TOFQ-Q mass spectrometer. The NMR spectra data were measured on a Bruker NMR spectrometer (600 MHz). ECD spectra were measured on a Bio-Logic Science MOS-450 spectropolarimeter. Optical rotations were measured with an Anton Paar MCP 200 polarimeter. UV spectra were recorded on a Shimadzu spectrophotometer with a model UV-1700. Silica gel (200–300 mesh, Qingdao Haiyang Chemical Co., Ltd., Qingdao, PR China), ODS (50  $\mu\text{m}$ , YMC Co. Ltd., Kyoto, Japan), Sephadex LH-20 (GE Healthcare, Uppsala, Sweden). TLC analyses were carried out on silica gel plates (GF254, Qingdao Haiyang Chemical Co., Ltd., Qingdao, PR China). X-ray crystallographic analysis was performed on a Bruker PHOTON-II detector (Bruker Biospo Rheinstetten, Germany). Semi-preparative HPLC was performed on YMC ODS-A column (250  $\times$  10 mm I. D., 5  $\mu\text{m}$ ) equipped with Shimadzu SPD-20A UV-Vis detector and LC-6AD pump.

## Plant material

The twigs and leaves of *C. fortunei* were purchased from Zhenyuantang Pharmaceutical Co., Ltd., Bozhou City, Anhui Province, PR China, in August 2017. The seeds of *C. fortunei* were purchased from Futaba Seed Company, Wuxi City, Jiangsu Province, PR China, in August 2017. The plant species were identified by Assoc. Prof. Jiuzhi Yuan, School of Traditional Chinese Medicine, Shenyang Pharmaceutical University, PR China. The plant specimens (voucher no. SJS-201708-3 and SJS-201708-4) were deposited at Key Laboratory of Structure-Based Drug Design & Discovery, Ministry of Education, Shenyang Pharmaceutical University, PR China.

## Extraction and isolation

The dried twigs and leaves of *C. fortunei* (45.8 kg) were extracted with 75% EtOH (400 L) three times for two hours each time. After removal of the solvent, the crude extract (6.45 kg) was dissolved in 3% HCl (12 L) solution to pH 2–3 and filtered to obtain a precipitate and an acidic filtrate, respectively. The acidic aqueous solution was partitioned with  $\text{CH}_2\text{Cl}_2$  (30 L) to afford part C (20 g). Then the acid

aqueous solution was basified with solid  $\text{Na}_2\text{CO}_3$  to pH 9–10 and extracted again with  $\text{CH}_2\text{Cl}_2$  to afford part A (30 g). The above-mentioned precipitate was suspended in water and adjusted to the neutral pH with anhydrous sodium carbonate, which was extracted with  $\text{CH}_2\text{Cl}_2$  to obtain part B (105 g).

Part A was subjected to an ODS open column chromatography with MeOH- $\text{H}_2\text{O}$  (10:100–100:0, v/v) to give six fractions (AI-AV). Fraction AI (5.0 g) was separated by column chromatography (CC) over silica gel, and eluted with  $\text{CH}_2\text{Cl}_2$ -MeOH (100:0–0:100, v/v) to give subfractions AI-1–AI-6. Fraction AI-1 (3.0 g) was isolated by silica gel CC eluted with  $\text{CH}_2\text{Cl}_2$ -MeOH (100:0–0:100, v/v) to give subfractions AI-1-1–AI-1-8. **30** (500.0 mg) was precipitated as crystals from fraction AI-1-1 (1 g) and the remaining mother liquid was isolated by semi-preparative HPLC with MeOH- $\text{H}_2\text{O}$  (39:61, containing 0.005% diethylamine (DEA)) to yield **8** (9.0 mg,  $t_R$  55.0 min). Fraction AI-1-2 (1.0 g) was isolated by silica gel CC eluted with  $\text{CH}_2\text{Cl}_2$ -MeOH (100:0–0:100, v/v) to give subfractions AI-1-2-1–AI-1-2-6. **9** (18.0 mg) was precipitated as crystals from fraction AI-1-2-1 (100 mg). Fraction AI-1-4 (300 mg) was isolated by semi-preparative HPLC with MeOH- $\text{H}_2\text{O}$  (35:65, containing 0.005% DEA) to obtain **14** (100.0 mg,  $t_R$  16.0 min), and **1** (20.0 mg,  $t_R$  26.0 min). **14a** (3.0 mg) was precipitated as crystals from fraction AI-1-6 (100 mg) and **13** (5.5 mg) was obtained as crystals from fraction AI-1-7 (100 mg). Fraction AII (1.0 g) was isolated by silica gel CC eluted with petroleum ether-ethyl acetate (100:10–0:100, v/v) to give subfractions AII-1–AII-6. Fraction AII-1 (200 mg) was isolated by semi-preparative HPLC with MeOH- $\text{H}_2\text{O}$  (35:65, containing 0.005% DEA) to obtain **10** (5.0 mg,  $t_R$  38.0 min), and **22** (3.0 mg,  $t_R$  45.0 min). Fraction AII-2 (100 mg) was purified on a Sephadex LH-20 column (eluted with MeOH) to obtain **21** (5 mg). Fraction AII-3 (1.0 g) was separated by silica gel CC eluted with  $\text{CH}_2\text{Cl}_2$ -acetone (100:0–0:100, v/v) to give subfractions AII-3-1–AII-3-5. Fraction AII-3-1 (100 mg) was purified on a Sephadex LH-20 column (eluted with MeOH) to obtain **20** (10 mg). **5** (100.0 mg) was crystallized from fraction AIII (1.2 g). Fraction AIV (1.5 g) precipitated crystals (MeOH) to obtain **24** (150 mg).

Part B was separated by CC over silica gel eluted with CH<sub>2</sub>Cl<sub>2</sub>-MeOH (100:0–0:100, v/v) to give subfractions BI–BV. Fraction BV (4.5 g) was separated by silica gel CC and eluted with CH<sub>2</sub>Cl<sub>2</sub>-MeOH (100:0–0:100, v/v) to give subfractions BV-1–BV-6. **7** (20.0 mg) was crystallized from fraction BV-1 (800 mg) and the remaining part was isolated by semi-preparative HPLC with MeOH-H<sub>2</sub>O (33:67, containing 0.005% DEA) to obtain **6** (56.0 mg, *t<sub>R</sub>* 70.5 min). Fraction BV-2 (600 mg) was subjected to an ODS CC (MeOH-H<sub>2</sub>O, 10% to 100%, v/v) to give five fractions (BV-2-1–BV-2-5). Fraction BV-2-1 (200 mg) was isolated by semi-preparative HPLC with MeOH-H<sub>2</sub>O (60:40, containing 0.005% DEA) to obtain **23** (3.0 mg, *t<sub>R</sub>* 25.0 min) and **4** (2.0 mg, *t<sub>R</sub>* 29.0 min). Fraction BV-2-2 (50 mg) was isolated by semi-preparative HPLC with MeOH-H<sub>2</sub>O (40:60, containing 0.005% DEA) to obtain **3** (2.0 mg, *t<sub>R</sub>* 16.5 min). Fraction BV-3 (100 mg) was isolated by semi-preparative HPLC with MeOH-H<sub>2</sub>O (45:55, containing 0.005% DEA) to obtain **2** (5.0 mg, *t<sub>R</sub>* 45.2 min). Fraction BV-3 (300 mg) was separated by CC over silica gel eluted with CH<sub>2</sub>Cl<sub>2</sub>-MeOH (100:0–0:100, v/v) to give subfractions BV-3-1–BV-3-5. Fraction BV-3-1 (85 mg) yielded **31** (3.0 mg) by recrystallization (MeOH).

The seed kernels of *C. fortunei* (15.0 kg) were immersed and degreased with petroleum ether (90 L) at room temperature to obtain 6.3 kg of defatted seed kernels. Defatted seed kernels were extracted with 85% EtOH and concentrated by refluxing to obtain 1146 g of EtOH extract. The extract was suspended in water and extracted with petroleum ether to obtain part D (247 g). The aqueous layer was adjusted to pH 2–3 by adding 2–3% HCl (3 L) and filtered to obtain acid aqueous solution and precipitate. The aqueous acid solution was extracted with CH<sub>2</sub>Cl<sub>2</sub> (40 L) to obtain part E (43 g), and then was adjusted to pH 9–10 with solid Na<sub>2</sub>CO<sub>3</sub> and extracted with CH<sub>2</sub>Cl<sub>2</sub> (80 L) again to obtain part F (152 g).

Part F was subjected to a silica gel CC eluted with CH<sub>2</sub>Cl<sub>2</sub>-MeOH (100:0–0:100, v/v) to give six fractions (FI–FVI). Fraction FII (5.0 g) was separated by CC over silica gel, and eluted with petroleum ether-ethyl acetate (100:0–0:100, v/v) to give subfractions FII-1–FII-7. Fraction FII-3 was separated on an ODS column with MeOH-H<sub>2</sub>O (10:100–100:0, v/v) to give six fractions (FII-3-1–FII-3-6). Fraction FII-

3-1 was isolated by semi-preparative HPLC with MeOH-H<sub>2</sub>O (18:82, containing 0.005% DEA) to obtain **18** (0.8 mg, *t<sub>R</sub>* 71.0 min). **26** (3.8 mg) was precipitated as crystals from fraction FIII and the remaining mother liquid was separated on an ODS column (MeOH-H<sub>2</sub>O, 10% to 100%, v/v) to obtain five fractions FIII-3-1–FIII-3-5. Fractions FIII-3-1 was separated by silica gel CC and eluted with CH<sub>2</sub>Cl<sub>2</sub>-MeOH (100:0–0:100, v/v) to give subfractions FIII-3-1-1–FIII-3-1-2. **19** was precipitated as crystals from fractions FIII-3-1-1. **29** was precipitated as crystals from fraction FIII-3-2. Fraction FIII-3-2 was purified on a Sephadex LH-20 column (eluted with MeOH) to obtain six fractions (FII-3-2-1–FII-3-2-6). Fraction FII-3-2-6 was isolated by semi-preparative HPLC with MeOH-H<sub>2</sub>O (48:52, containing 0.005% DEA) to obtain **25** (8.3 mg, *t<sub>R</sub>* 20.0 min) and **12** (1.8 mg, *t<sub>R</sub>* 26.0 min). Fraction FIV was separated on an ODS column (MeOH-H<sub>2</sub>O, 10% to 100%, v/v) to obtain five fractions FIV-1–FIV-6. Fraction FIV-2 was isolated by semi-preparative HPLC with MeOH-H<sub>2</sub>O (40:60, containing 0.005% DEA) to obtain **27** (5.4 mg, *t<sub>R</sub>* 34.0 min). FIV-4 was isolated by semi-preparative HPLC with MeOH-H<sub>2</sub>O (40:60, containing 0.005% DEA) to obtain **17** (2.6 mg, *t<sub>R</sub>* 39.0 min), **15** (2.5 mg, *t<sub>R</sub>* 42.0 min) and **28** (5.1 mg, *t<sub>R</sub>* 63.0 min). FIV-5 was isolated by semi-preparative HPLC with MeOH-H<sub>2</sub>O (41:59, containing 0.005% DEA) to obtain **11** (12.0 mg, *t<sub>R</sub>* 27.0 min) and **16** (11.0 mg, *t<sub>R</sub>* 50.0 min). FIV-6 was isolated by semi-preparative HPLC with MeOH-H<sub>2</sub>O (50:50, containing 0.005% DEA) to obtain **32** (4.5 mg, *t<sub>R</sub>* 50.0 min).

### Spectroscopic data of compounds

Cephalofortunine A  $\beta$ -*N*-oxide (**1**): colorless needle crystal;  $[\alpha]_D^{20} + 45.0$  (*c* 0.3, CH<sub>3</sub>OH); UV (CH<sub>3</sub>OH)  $\lambda_{\max}$  (log $\epsilon$ ) 209 (5.08), 238 (3.12), 280 (1.63) nm; ECD (CH<sub>3</sub>OH)  $\lambda_{\max}$  ( $\Delta\epsilon$ ) 209 (+10.08), 228 (-15.02), 249 (+20.06), 282 (-13.9) nm; <sup>1</sup>H and <sup>13</sup>C NMR (DMSO-*d*<sub>6</sub>) see [Table 1](#); HRESIMS *m/z* 378.1927 ([M+H]<sup>+</sup>, calcd. 378.1911, C<sub>20</sub>H<sub>27</sub>NO<sub>6</sub>).

Cephalofortunine A (**2**): colorless solid;  $[\alpha]_D^{20} + 51.6$  (*c* 0.3, CH<sub>3</sub>OH); UV (CH<sub>3</sub>OH)  $\lambda_{\max}$  (log $\epsilon$ ) 208 (5.66) nm, 233 (3.60), 280 (1.88) nm; ECD (CH<sub>3</sub>OH)  $\lambda_{\max}$  ( $\Delta\epsilon$ ) 218 (-9.82), 242 (-29.80), 279 (-10.80) nm; <sup>1</sup>H and <sup>13</sup>C NMR (DMSO-*d*<sub>6</sub>) see [Table 1](#); HRESIMS *m/z* 362.1970 ([M+H]<sup>+</sup>, calcd. 362.1962, C<sub>20</sub>H<sub>27</sub>NO<sub>5</sub>).



Cephalofortinine B (**3**): colorless solid;  $[\alpha]_{\text{D}}^{20} + 15.0$  ( $c$  0.05, CH<sub>3</sub>OH); UV (CH<sub>3</sub>OH)  $\lambda_{\text{max}}$  (log $\epsilon$ ) 206 (5.08), 233 (3.07), 283 (1.62) nm; ECD (CH<sub>3</sub>OH)  $\lambda_{\text{max}}$  ( $\Delta\epsilon$ ) 212 (+22.08), 227 (-7.20), 243 (+7.92) nm; <sup>1</sup>H and <sup>13</sup>C NMR (DMSO-*d*<sub>6</sub>) see [Table 1](#); HRESIMS  $m/z$  348.1794 ([M+H]<sup>+</sup>, calcd. 348.1805, C<sub>19</sub>H<sub>25</sub>NO<sub>5</sub>).

Fortuneicyclidin C (**11**): colorless solid;  $[\alpha]_{\text{D}}^{20} - 31.0$  ( $c$  0.23, CH<sub>3</sub>OH); UV (CH<sub>3</sub>OH)  $\lambda_{\text{max}}$  (log $\epsilon$ ) 294 (0.20), 241 (0.18), 205 (1.63) nm; ECD (CH<sub>3</sub>OH)  $\lambda_{\text{max}}$  ( $\Delta\epsilon$ ) 219 (-11.5), 241 (+2.02), 282 (-2.50) nm; <sup>1</sup>H and <sup>13</sup>C NMR (DMSO-*d*<sub>6</sub>) see [Table 2](#); HRESIMS  $m/z$  318.1340 ([M+H]<sup>+</sup>, calcd. 318.1336, C<sub>17</sub>H<sub>20</sub>NO<sub>5</sub>).

Cephalocyclidin B (**13**): colorless needle crystal;  $[\alpha]_{\text{D}}^{20} - 62.6$  ( $c$  0.3, CH<sub>3</sub>OH); UV (CH<sub>3</sub>OH)  $\lambda_{\text{max}}$  (log $\epsilon$ ) 210 (4.62), 248 (1.98), 294 (1.02) nm; ECD (CH<sub>3</sub>OH)  $\lambda_{\text{max}}$  ( $\Delta\epsilon$ ) 230 (-6.36), 252 (+29.80), 292 (-19.02) nm; <sup>1</sup>H and <sup>13</sup>C NMR (DMSO-*d*<sub>6</sub>) see [Table 2](#); HRESIMS  $m/z$  366.1115 ([M]<sup>+</sup>, calcd. 366.1104, C<sub>18</sub>H<sub>21</sub>ClNO<sub>5</sub>).

11-Deoxycephalofortine B (**15**): colorless needle crystal;  $[\alpha]_{\text{D}}^{20} + 26.0$  ( $c$  0.2, CH<sub>3</sub>OH); UV (CH<sub>3</sub>OH)  $\lambda_{\text{max}}$  (log $\epsilon$ ) 205 (4.83), 239 (1.52), 291 (1.86) nm; ECD (CH<sub>3</sub>OH)  $\lambda_{\text{max}}$  ( $\Delta\epsilon$ ) 215 (+7.50), 235 (+5.05), 270 (-5.05), 298 (+2.50) nm; <sup>1</sup>H and <sup>13</sup>C NMR (DMSO-*d*<sub>6</sub>) see [Table 3](#); HRESIMS  $m/z$  304.1569 ([M+H]<sup>+</sup>, calcd. 304.1543, C<sub>17</sub>H<sub>22</sub>NO<sub>4</sub>).

Cephalotine A 3-*O*- $\beta$ -glucopyranoside (**17**): colorless needle crystal;  $[\alpha]_{\text{D}}^{20} - 27.6$  ( $c$  0.25, CH<sub>3</sub>OH); UV (CH<sub>3</sub>OH)  $\lambda_{\text{max}}$  (log $\epsilon$ ) 291 (0.51) nm; ECD (CH<sub>3</sub>OH)  $\lambda_{\text{max}}$  ( $\Delta\epsilon$ ) 215 (+4.95), 292 (-6.80) nm; <sup>1</sup>H and <sup>13</sup>C NMR (DMSO-*d*<sub>6</sub>) see [Table 3](#); HRESIMS  $m/z$  480.1872 ([M+H]<sup>+</sup>, calcd. 480.1864, C<sub>23</sub>H<sub>30</sub>NO<sub>10</sub>).

### Single-crystal X-ray crystallographic analysis

The X-ray crystallographic data of compounds **1**, **6** and **13** were acquired on a Bruker APEX-II CCD diffractometer and deposited at the Cambridge Crystallographic Data Center (CCDC, 2179041, 2179042 and 2179045). Detailed parameters are also available in Supporting Information.

### Computational methods

The Spartan 14.0 (Wavefunction Inc., Irvine, CA, USA) search using molecular mechanics MMFF was performed for (3*R*, 5*R*, 6*S*, 7*S*)-**2**. The low-energy conformers of them were further optimized in the gas phase by semi-empirical method in

Gaussian 09 program package,<sup>1, 2</sup> which were reoptimized and analysed by using the density functional theory (DFT) at the B3LYP/6-31 G (d, p) level, resulted in no imaginary frequencies. The ECD was calculated using TD-DFT-B3LYP/6-31 G (d, p) level with the CPCM model in methanol solution. The overall calculated ECD curves of all compounds were generated by Boltzmann weighting of their selected low-energy conformers using SpecDis 1.51.<sup>3</sup> The ECD spectra of **2**, **3**, **11**, **15** and **17** were calculated in the same method.

### **Antitumor activity assay**

Two human leukemia cell lines (THP-1 and K562) were obtained from the American Type Culture Collection, ATCC (Lockville, MD, USA). The test cells were cultured in RPMI 1640 media (Gibco, New York, USA) supplemented with 10% fetal bovine serum (ExCell Bio), 100 U/mL penicillin, and 100 µg/mL streptomycin. All cells were cultured at 37 °C in a 5% CO<sub>2</sub> incubator. Antitumor activity was evaluated by the method as described previously.<sup>4</sup>

### **References**

- 1 H. Goto and E. Osawa. An efficient algorithm for searching low-energy conformers of cyclic and acyclic molecules. *J. Chem. Soc. Perkin Trans.* 2008, 2, 187–198.
- 2 H. Goto and E. Osawa. Corner flapping: a simple and fast algorithm for exhaustive generation of ring conformations. *J. Am. Chem. Soc.* 1989, 111, 8950–8951.
- 3 T. Bruhn, A. Schaumlöffel, Y. Hemberger and G. Bringmann. SpecDis: quantifying the comparison of calculated and experimental electronic circular dichroism spectra. *Chirality* 2013, 25, 243–249.
- 4 Y. Z. Li, Z. L. Li, S. L. Yin, G. Shi, M. S. Liu, Y. K. Jing and H. M. Hua, Triterpenoids from *Calophyllum inophyllum* and their growth inhibitory effects on human leukemia HL-60 cells. *Fitoterapia* 2010, 81, 586–589.

## Qualitative Analysis Report

|                               |                        |                      |                      |
|-------------------------------|------------------------|----------------------|----------------------|
| <b>Data Filename</b>          | SJS-ZJ-25-POS.d        | <b>Sample Name</b>   | Sample28             |
| <b>Sample Type</b>            | Sample                 | <b>Position</b>      | P1-D1                |
| <b>Instrument Name</b>        | Instrument 1           | <b>User Name</b>     |                      |
| <b>Acq Method</b>             | default-20191128-pos.m | <b>Acquired Time</b> | 1/10/2020 2:48:26 PM |
| <b>IRM Calibration Status</b> | Some Ions Missed       | <b>DA Method</b>     | default.m            |
| <b>Comment</b>                |                        |                      |                      |
| <b>Sample Group</b>           | Info.                  |                      |                      |

### User Spectra

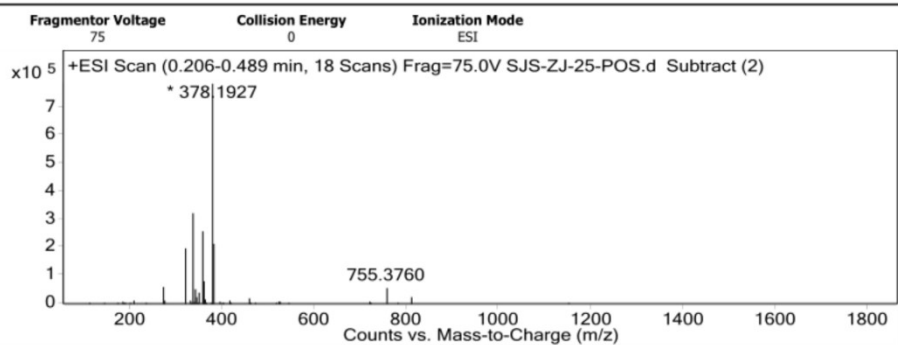

Figure S1. HRESIMS spectrum of **1**

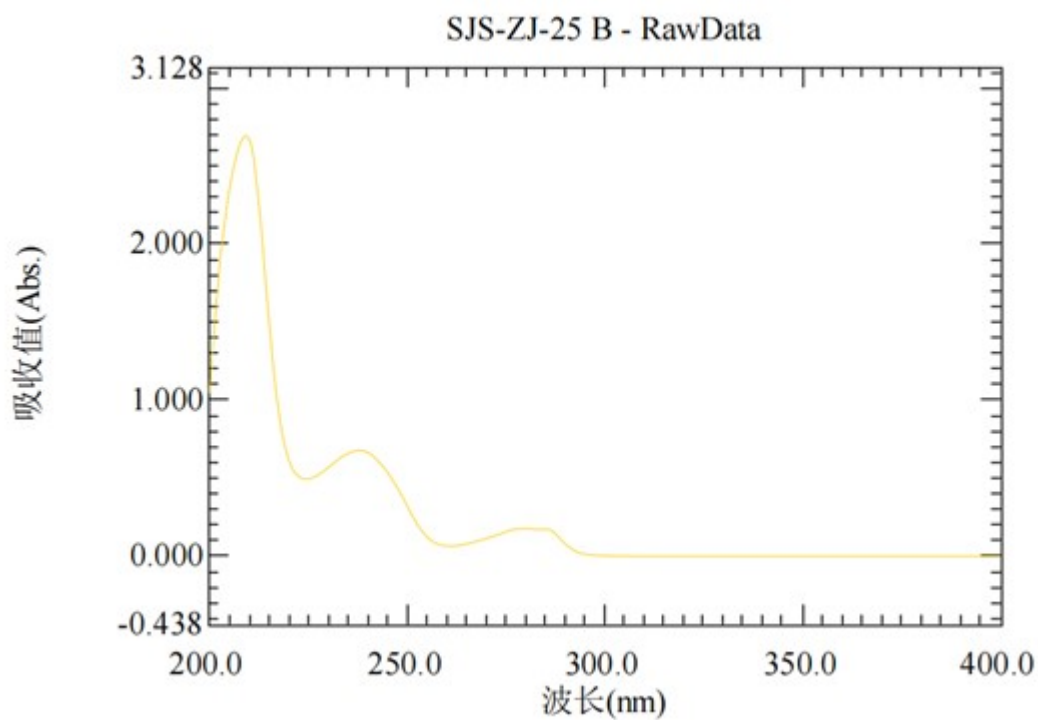

Figure S2. UV spectrum of **1**

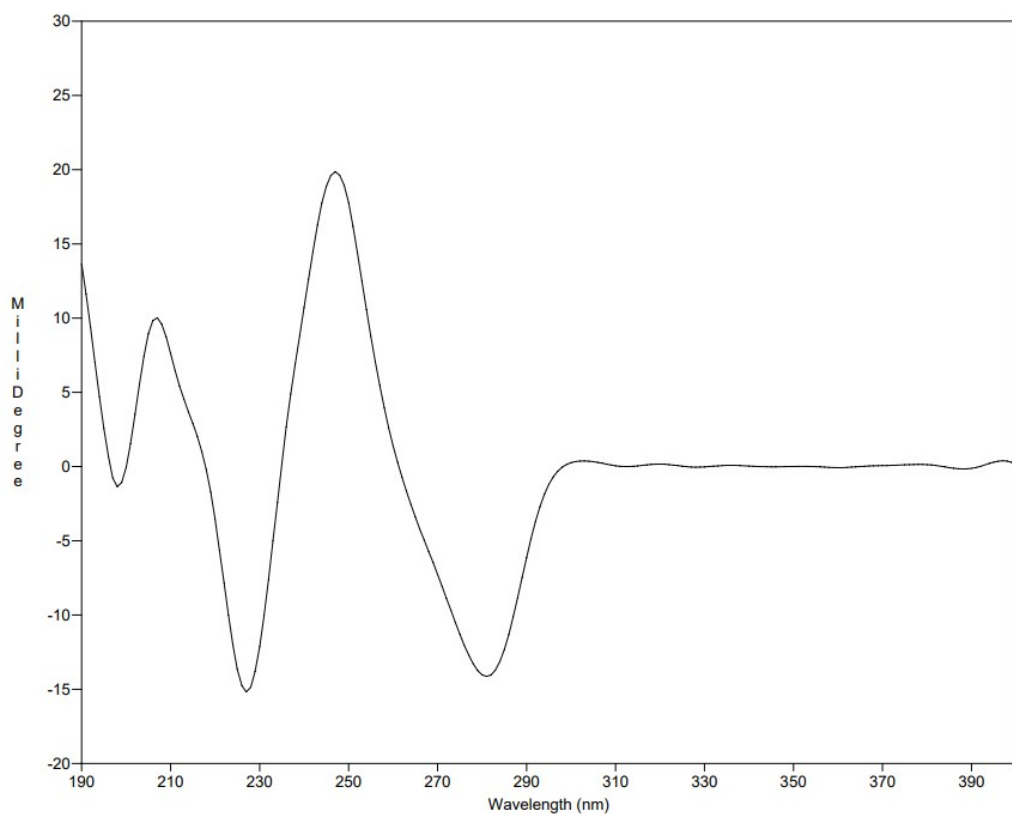

Figure S3. Experimental ECD spectrum of **1**

Z

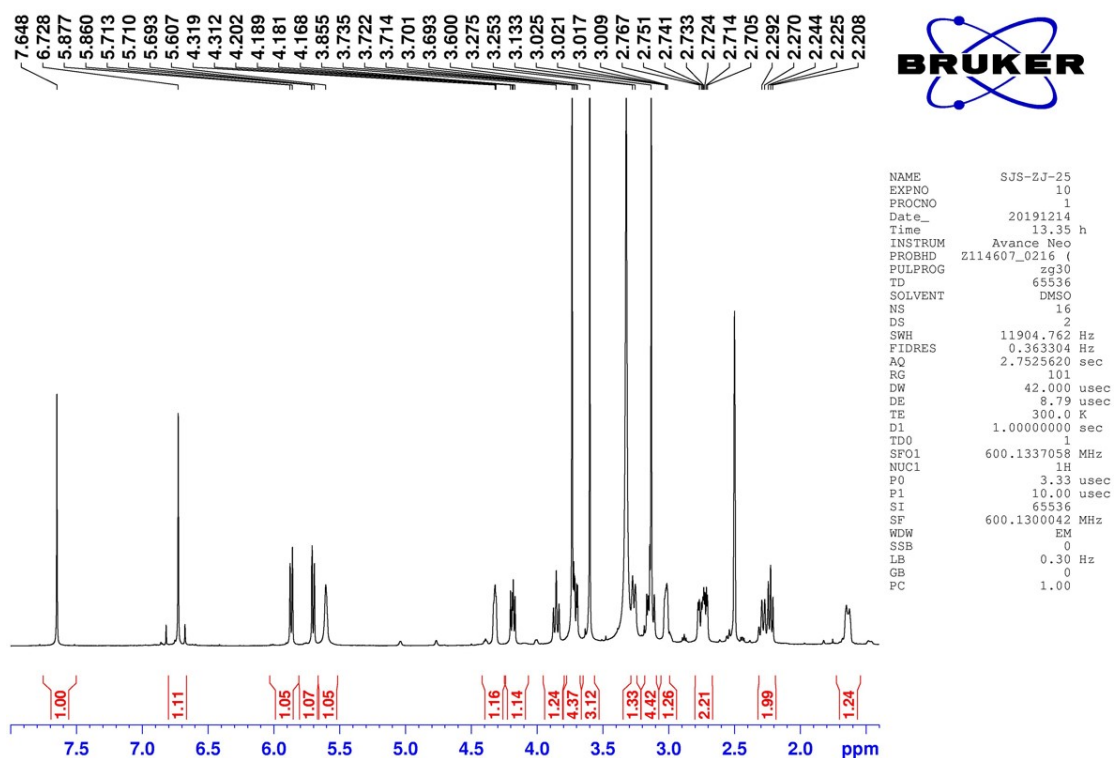

Figure S4.  $^1\text{H}$  NMR spectrum of compound **1** (600 MHz,  $\text{DMSO-}d_6$ )

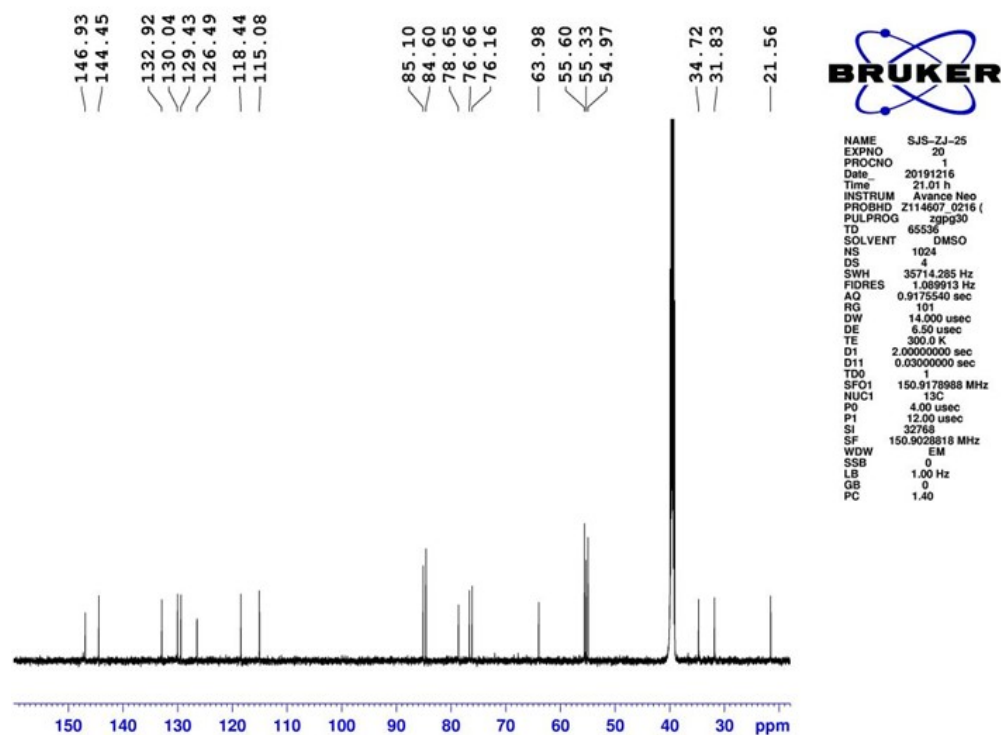

Figure S5.  $^{13}\text{C}$  NMR spectrum of compound **1** (150 MHz,  $\text{DMSO-}d_6$ )

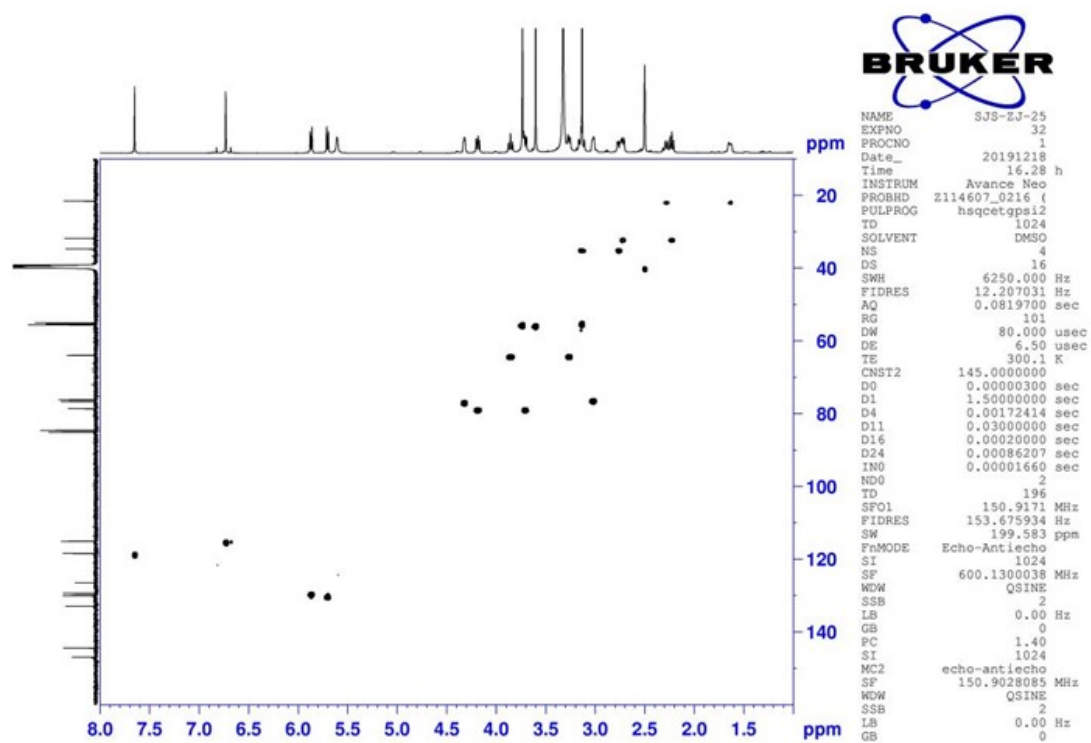

Figure S6. HSQC spectrum of compound **1** (600 MHz,  $\text{DMSO-}d_6$ )

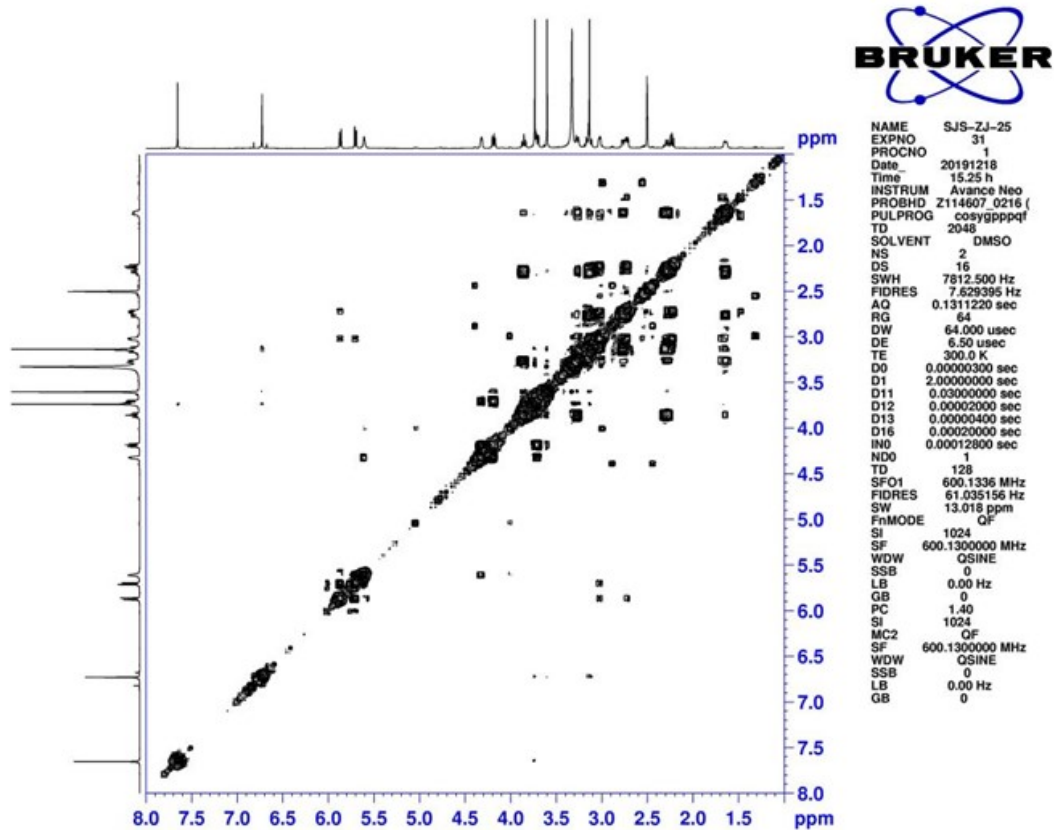

Figure S7.  $^1\text{H}$ - $^1\text{H}$  COSY spectrum of compound **1** (600 MHz,  $\text{DMSO-}d_6$ )

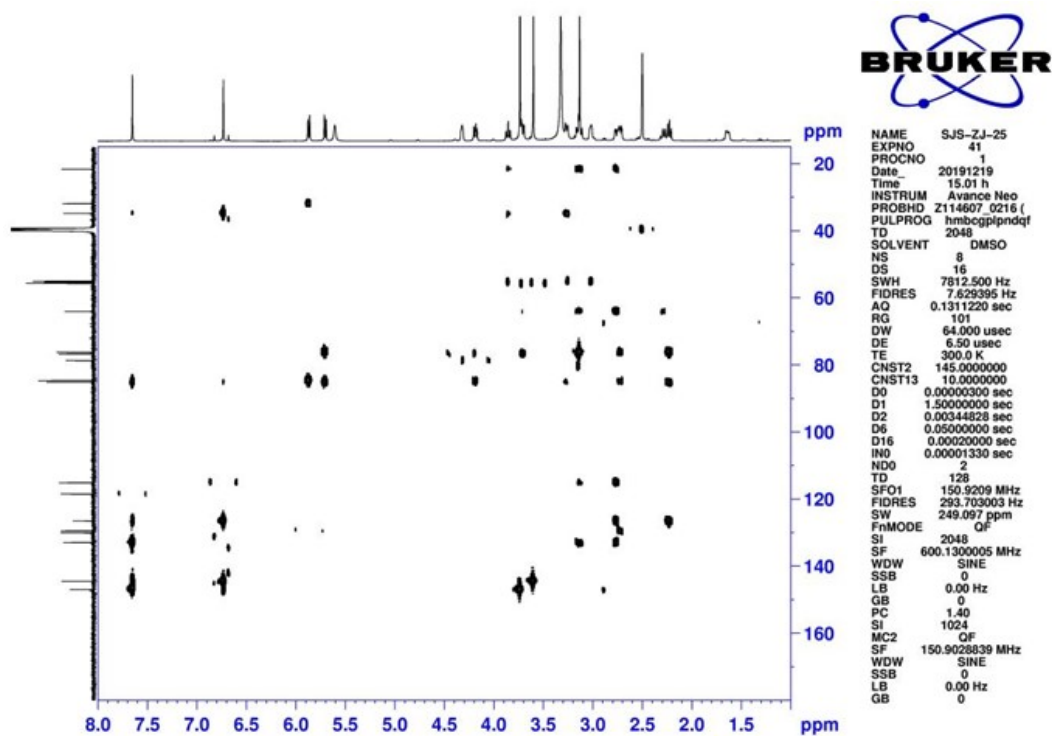

Figure S8. HMBC spectrum of compound **1** (600 MHz,  $\text{DMSO-}d_6$ )

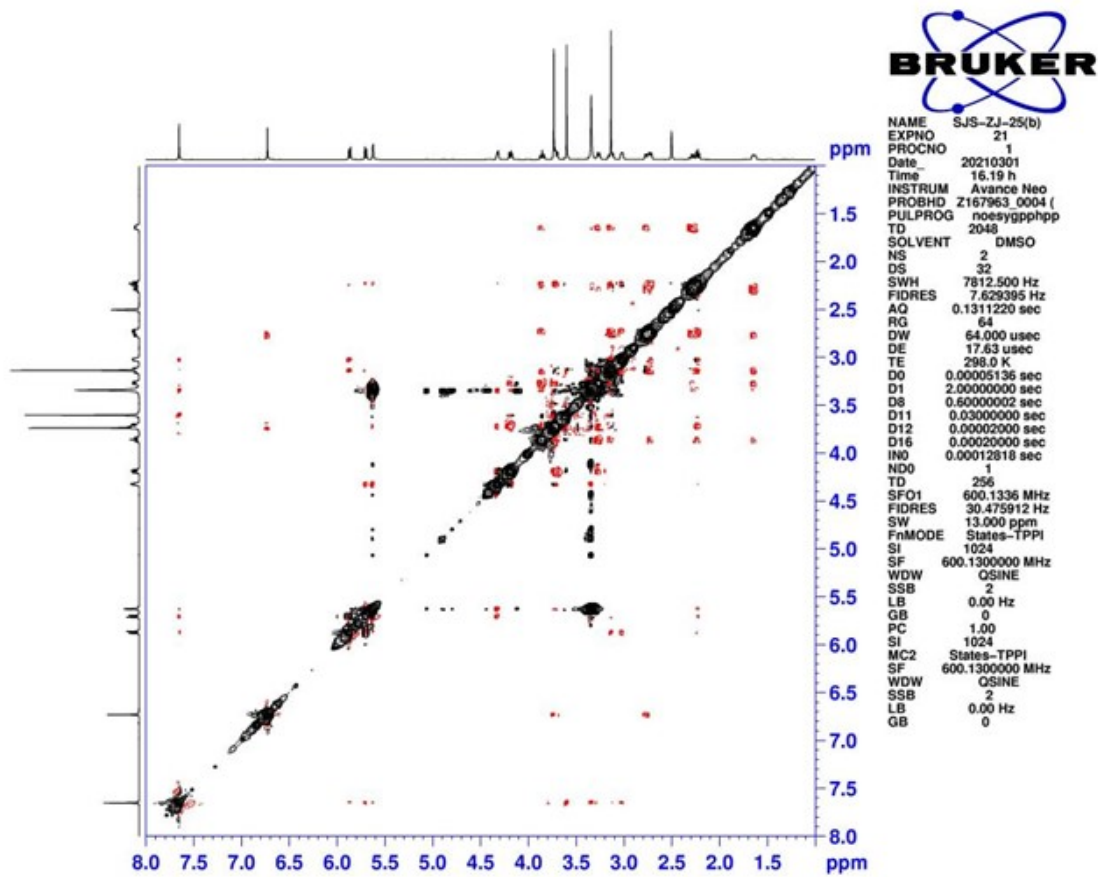

Figure S9. NOESY spectrum of compound 1 (600 MHz, DMSO- $d_6$ )

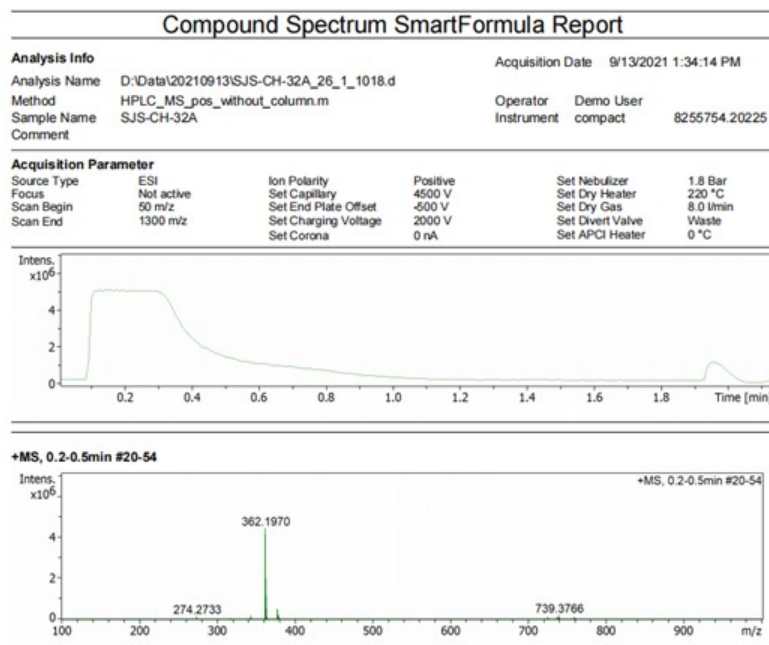

Figure S10. HRESIMS spectrum of 2

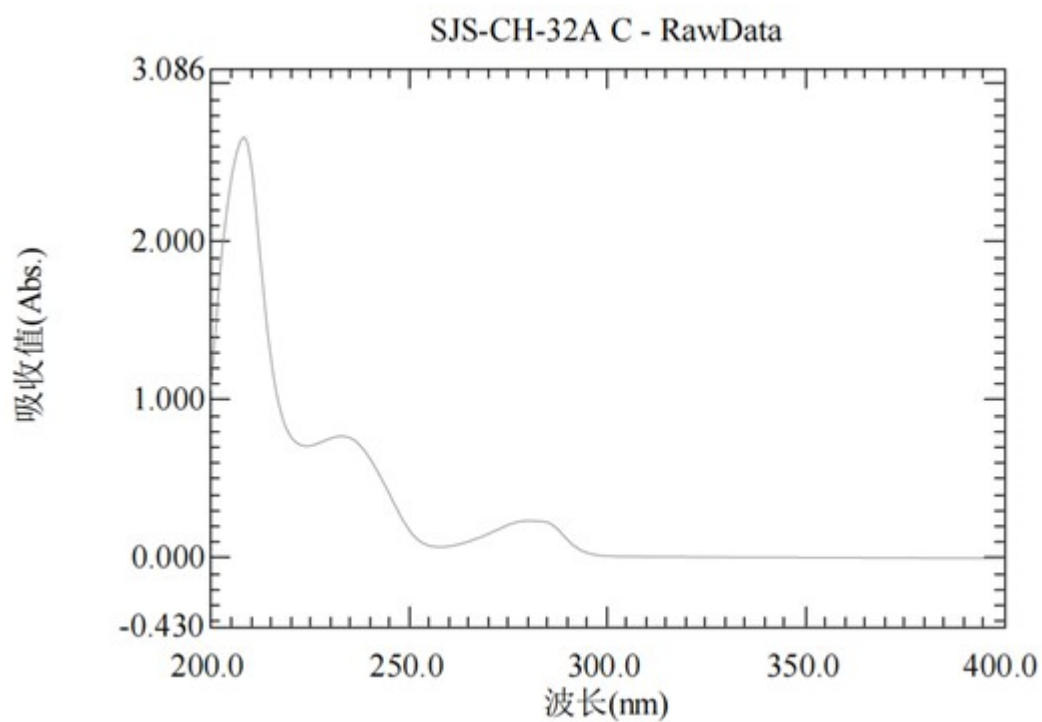

**Figure S11.** UV spectrum of **2**

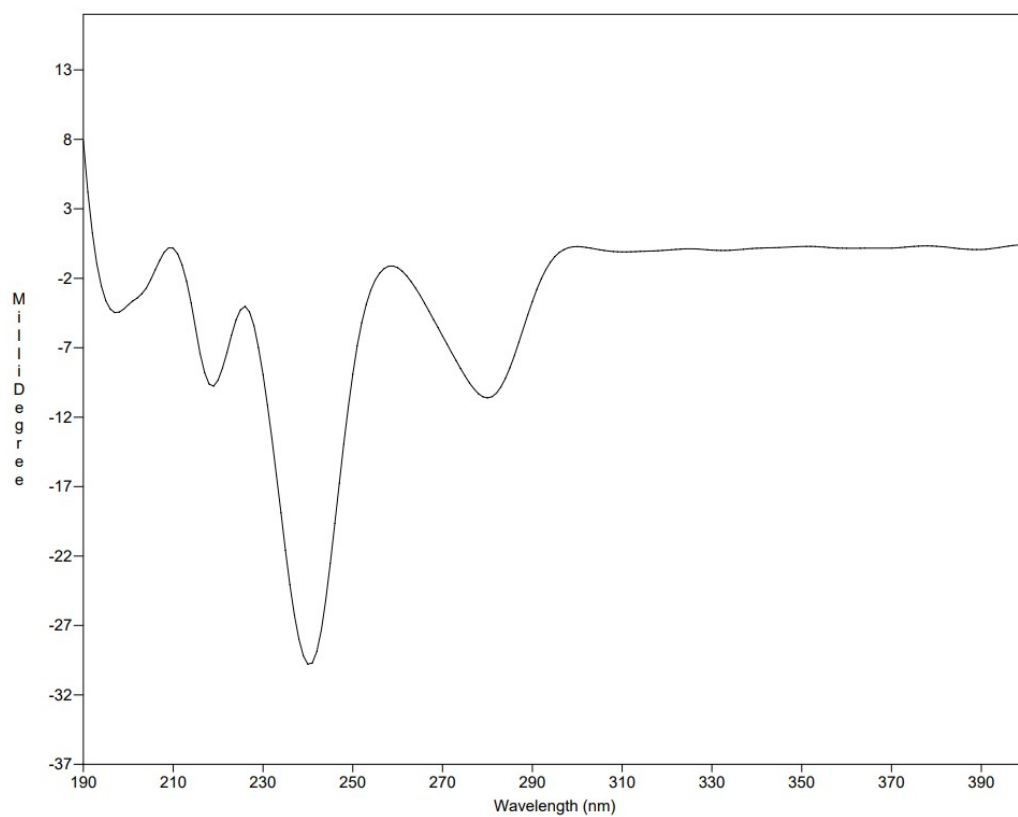

**Figure S12.** Experimental ECD spectrum of **2**



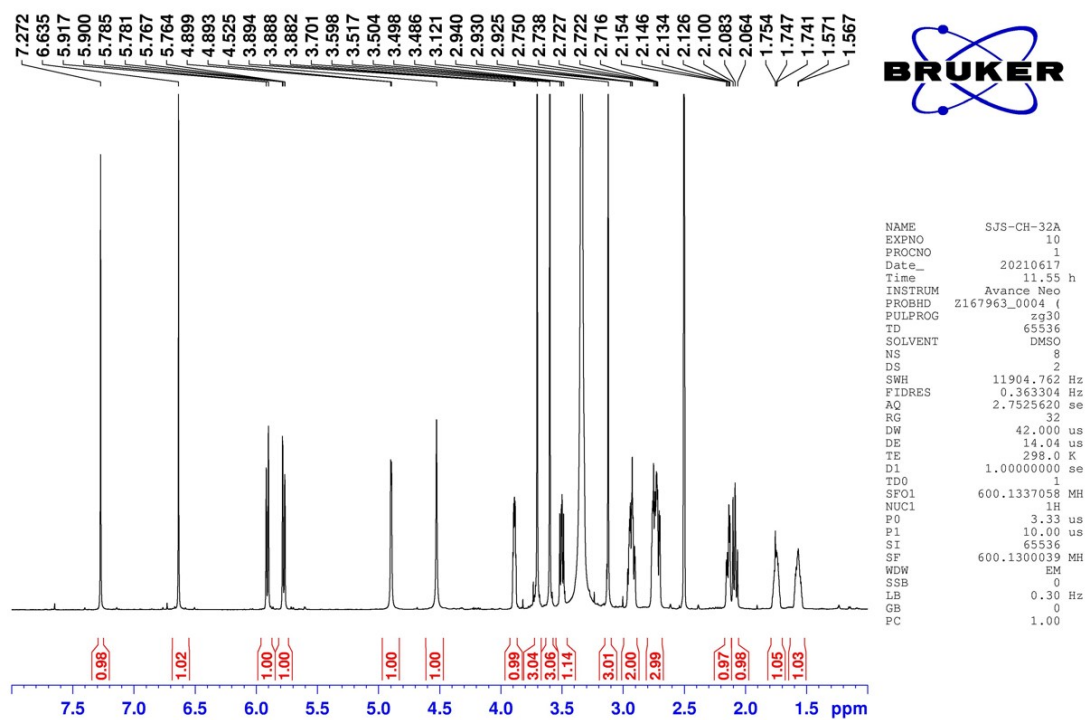

Figure S13. <sup>1</sup>H NMR spectrum of compound 2 (600 MHz, DMSO-*d*<sub>6</sub>)

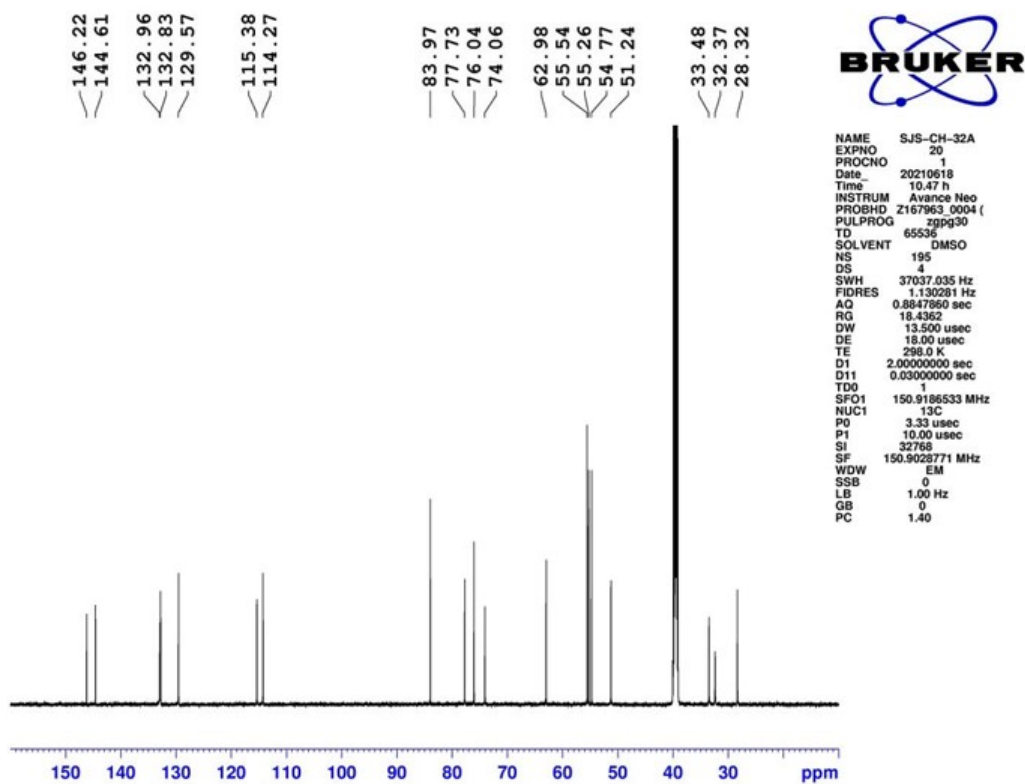

Figure S14. <sup>13</sup>C NMR spectrum of compound 2 (150 MHz, DMSO-*d*<sub>6</sub>)

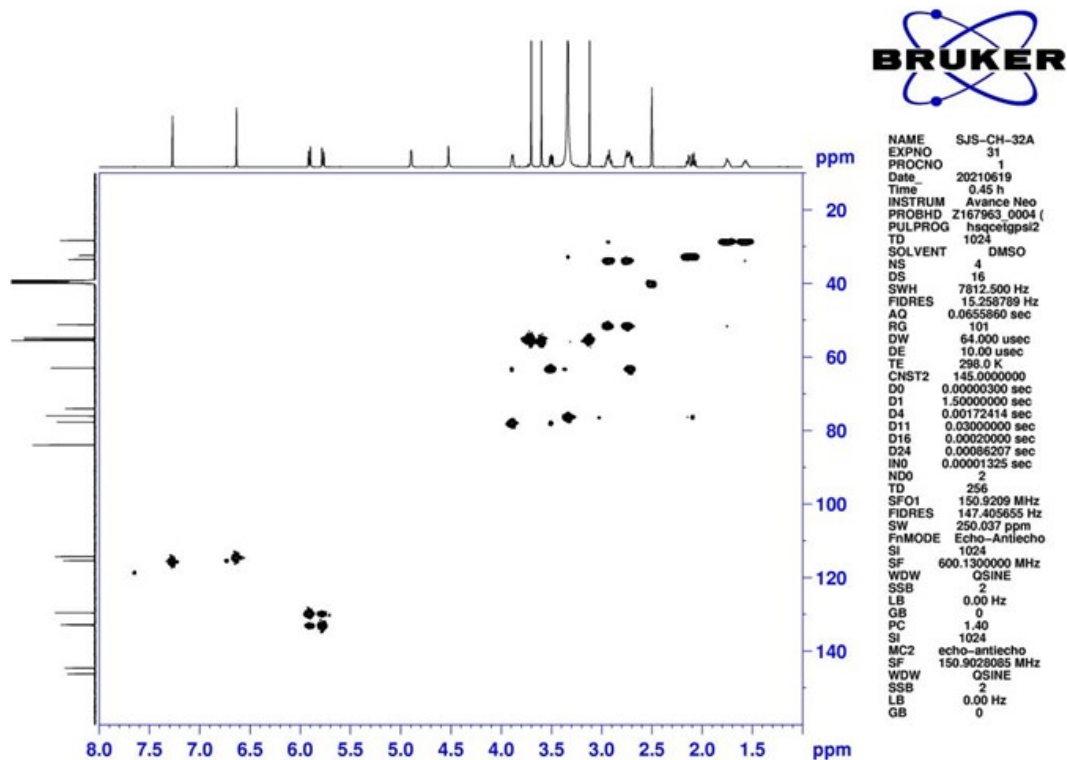

Figure S15. HSQC spectrum of compound 2 (600 MHz, DMSO- $d_6$ )

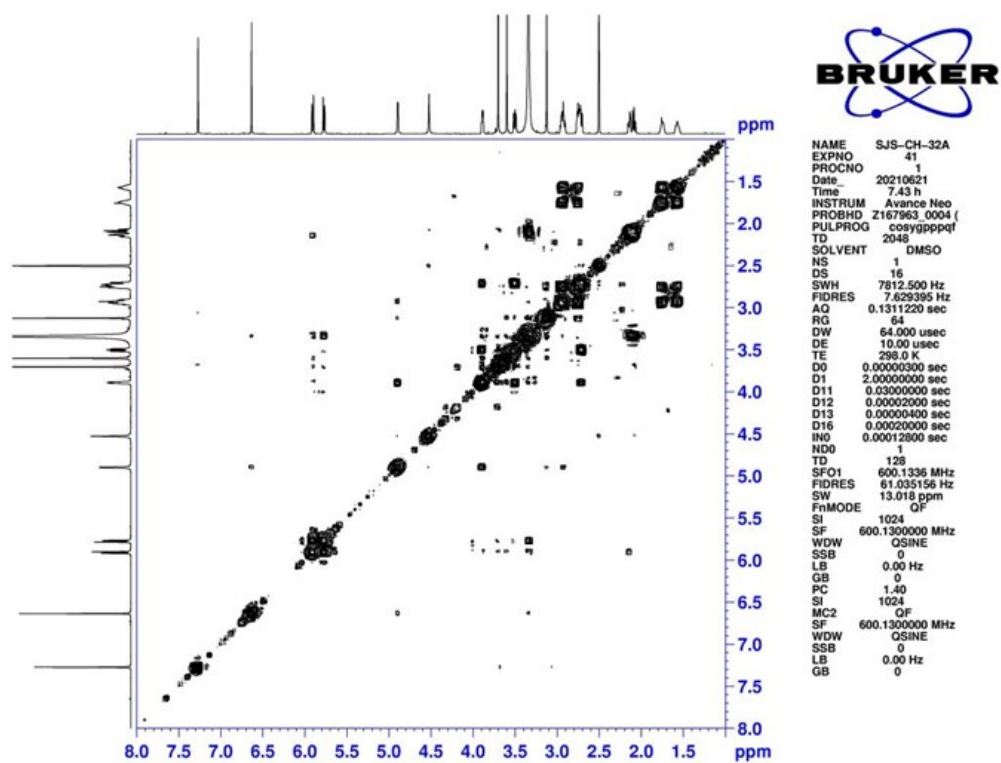

Figure S16.  $^1\text{H}$ - $^1\text{H}$  COSY spectrum of compound 2 (600 MHz, DMSO- $d_6$ )

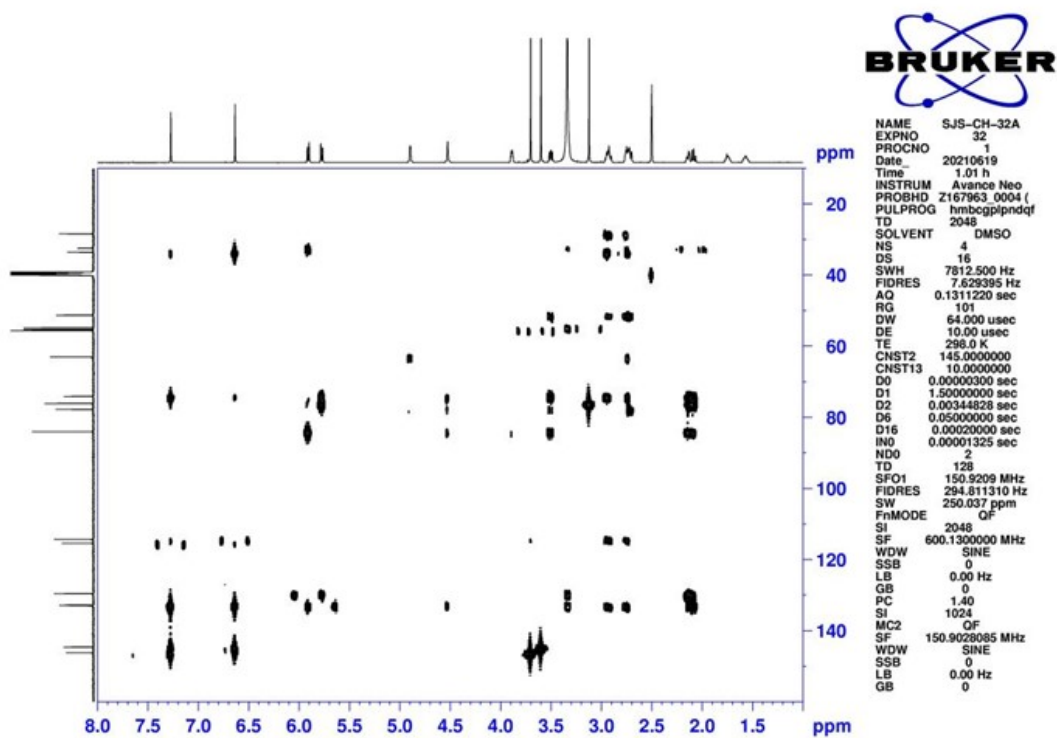

Figure S17. HMBC spectrum of compound 2 (600 MHz, DMSO- $d_6$ )

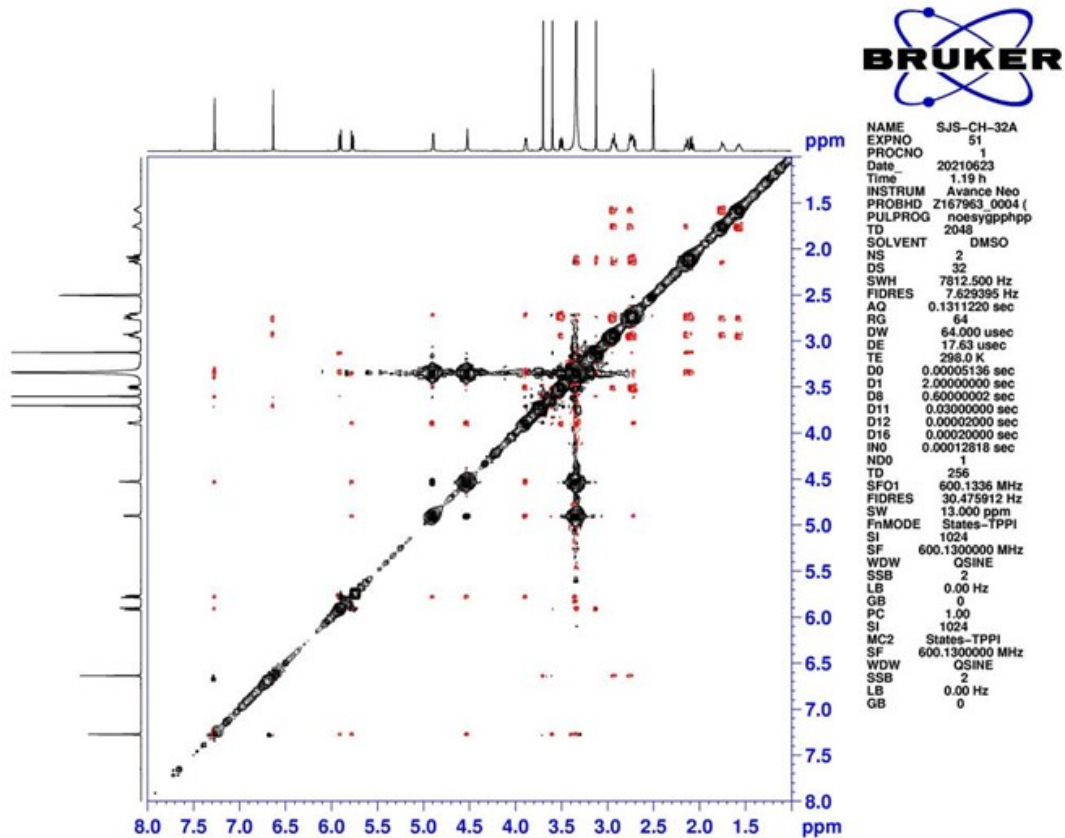

Figure S18. NOESY spectrum of compound 2 (600 MHz, DMSO- $d_6$ )

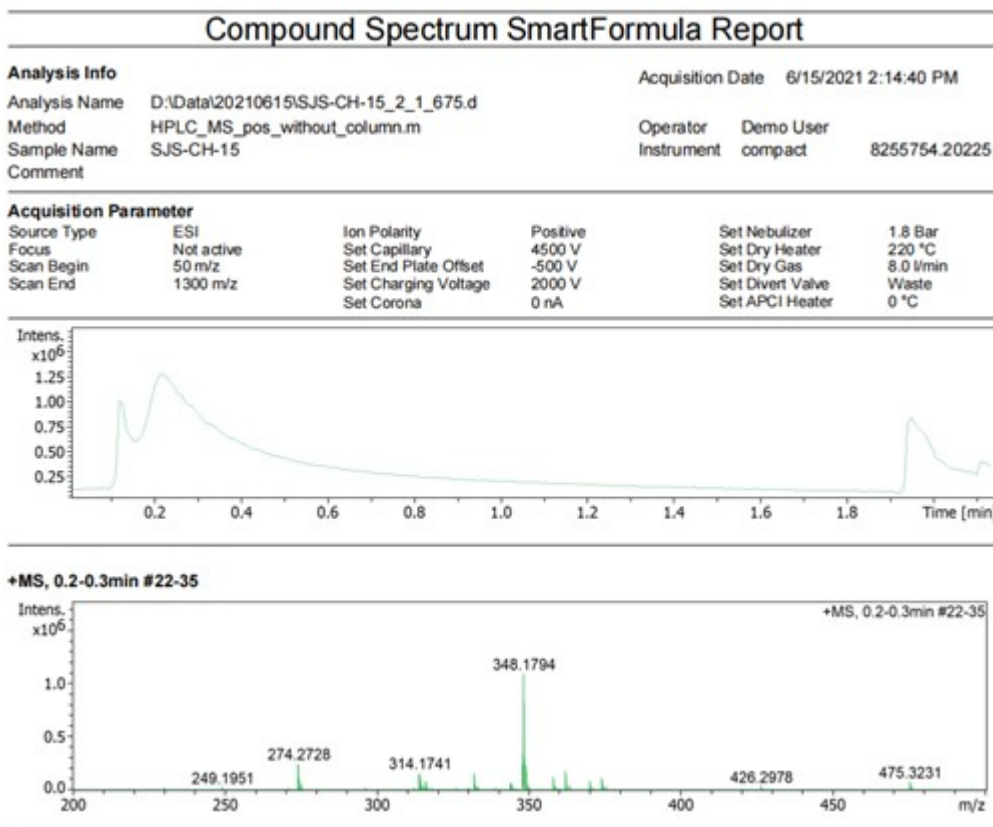

**Figure S19.** HRESIMS spectrum of **3**

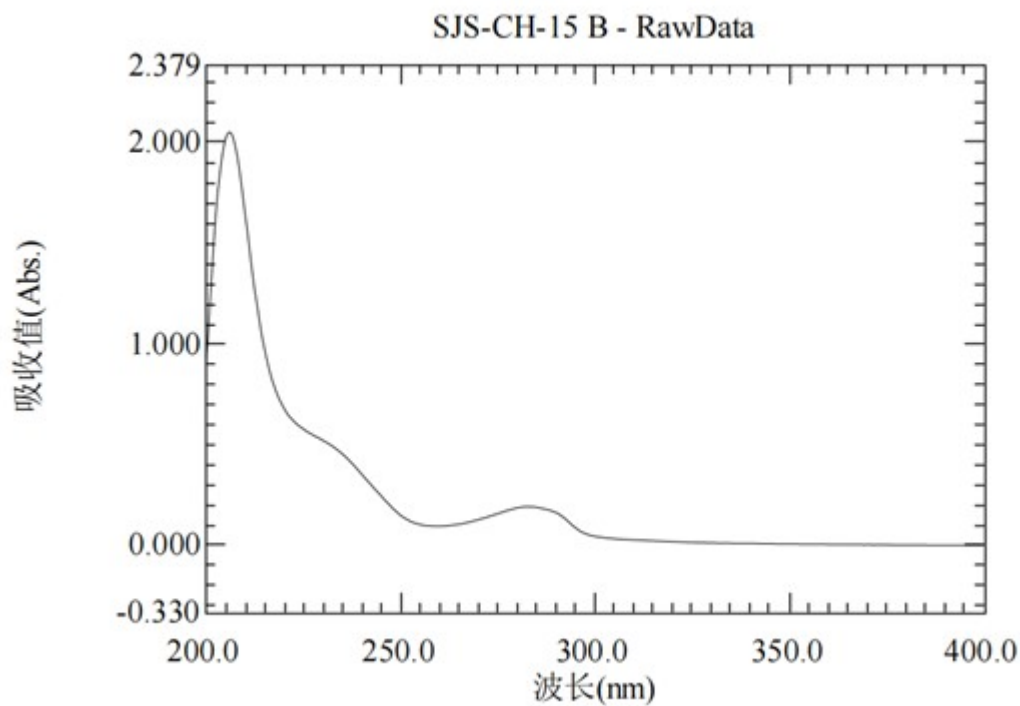

**Figure S20.** UV spectrum of **3**

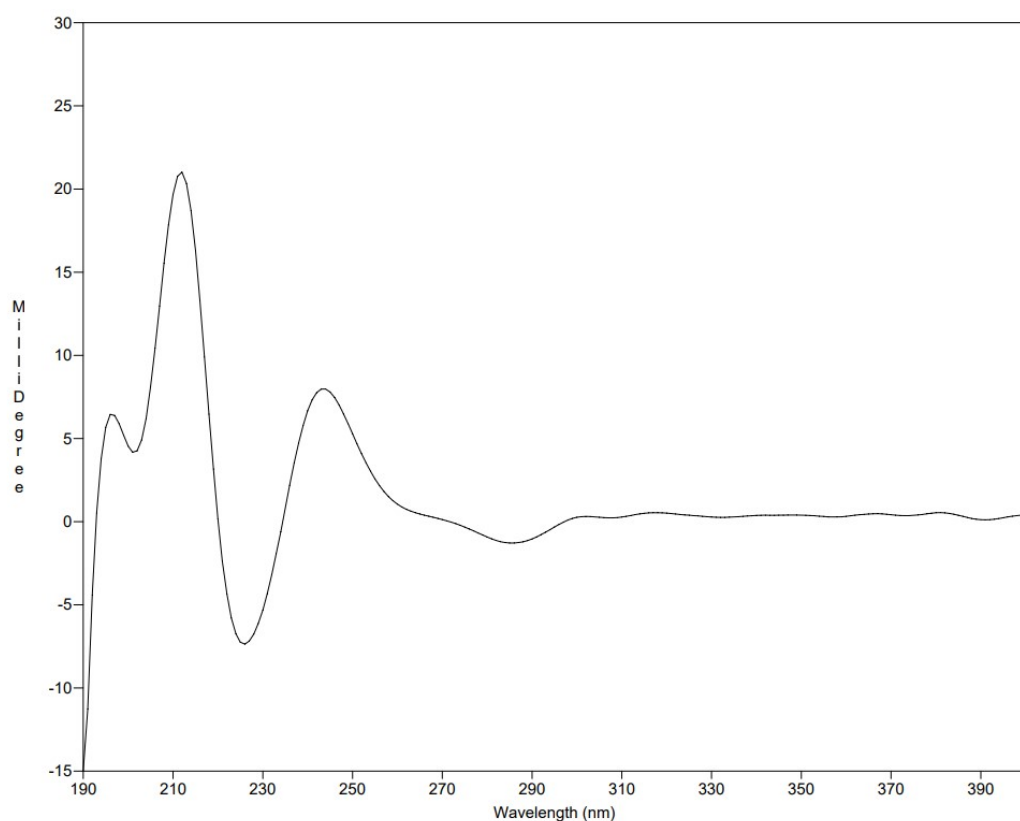

Figure S21. Experimental ECD spectrum of **3**

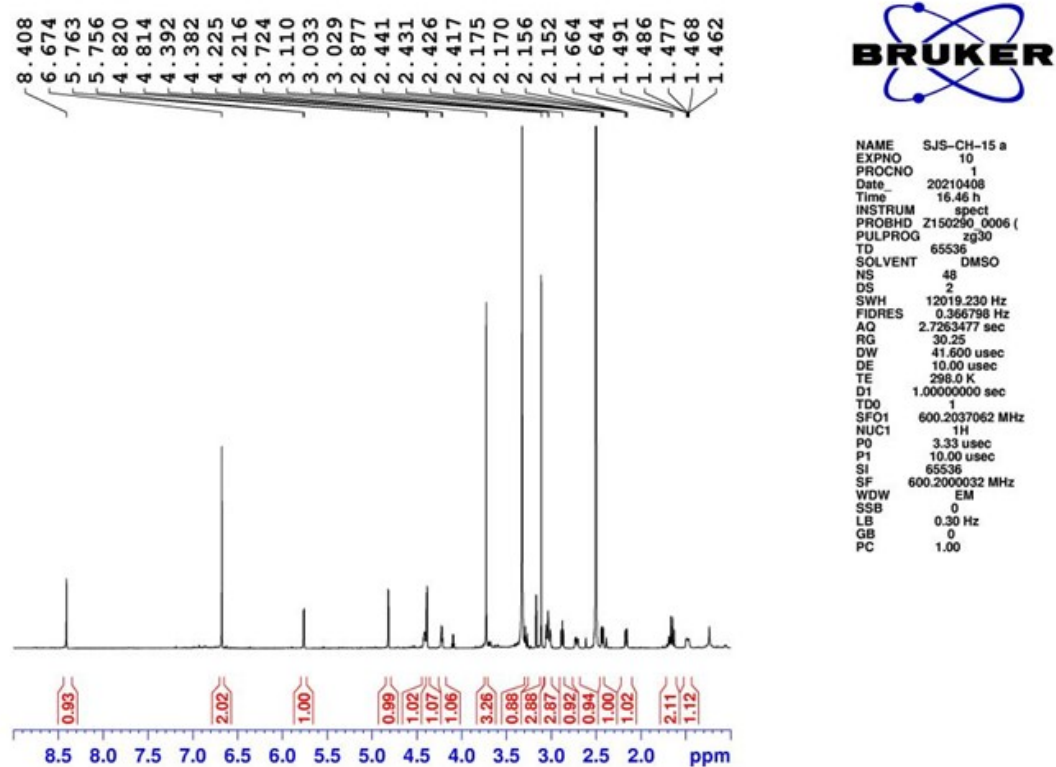

Figure S22.  $^1\text{H}$  NMR spectrum of compound **3** (600 MHz,  $\text{DMSO-}d_6$ )

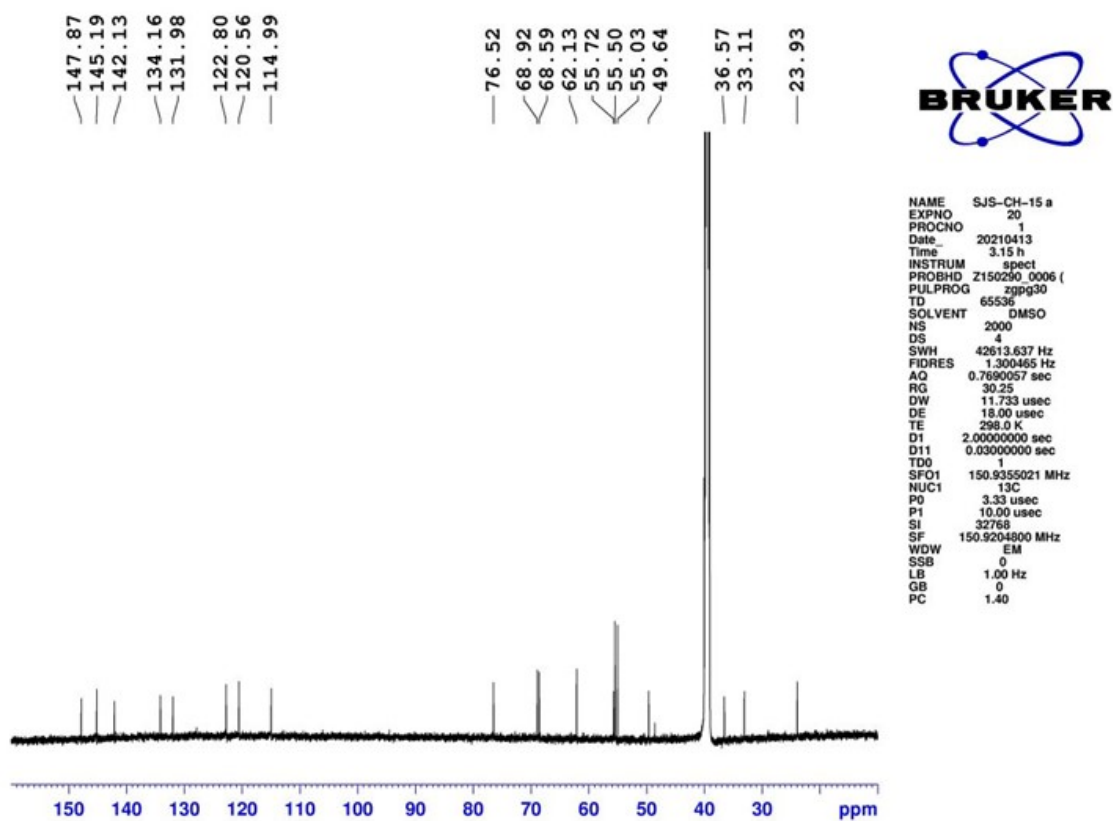

Figure S23.  $^{13}\text{C}$  NMR spectrum of compound **3** (150 MHz,  $\text{DMSO-}d_6$ )

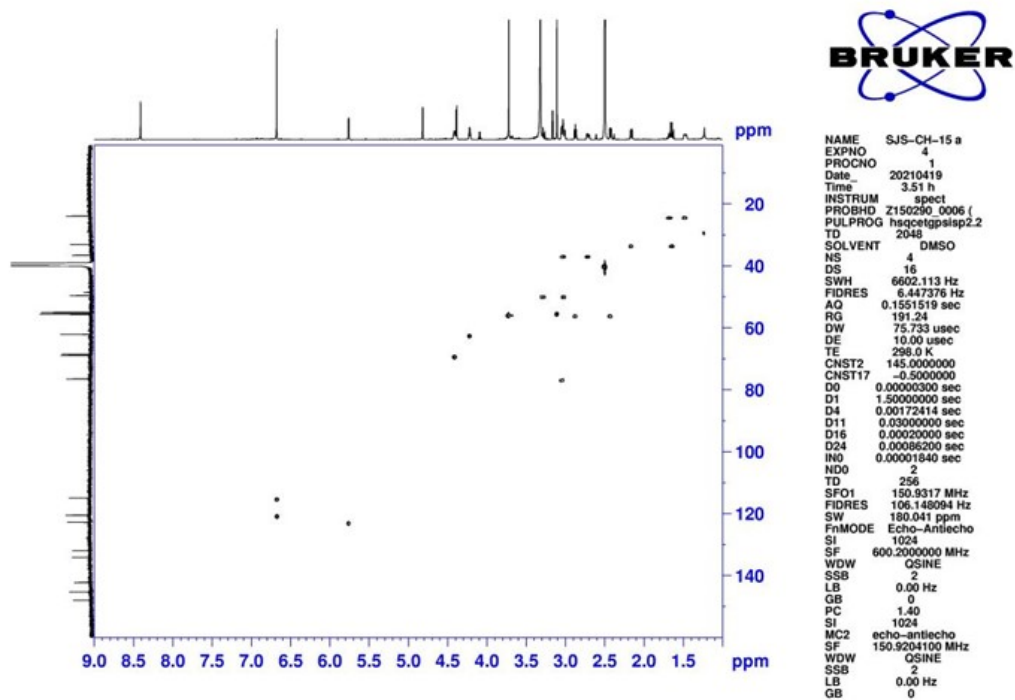

Figure S24. HSQC spectrum of compound **3** (600 MHz,  $\text{DMSO-}d_6$ )

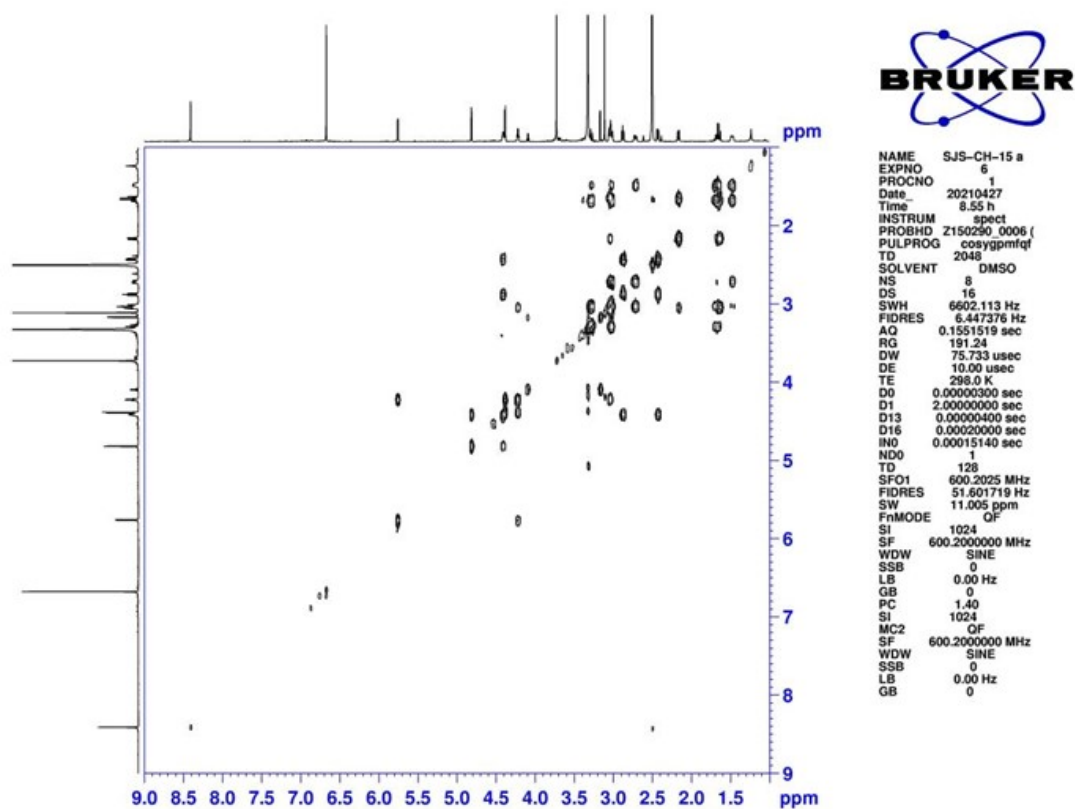

Figure S25.  $^1\text{H}$ - $^1\text{H}$  COSY spectrum of compound 3 (600 MHz,  $\text{DMSO-}d_6$ )

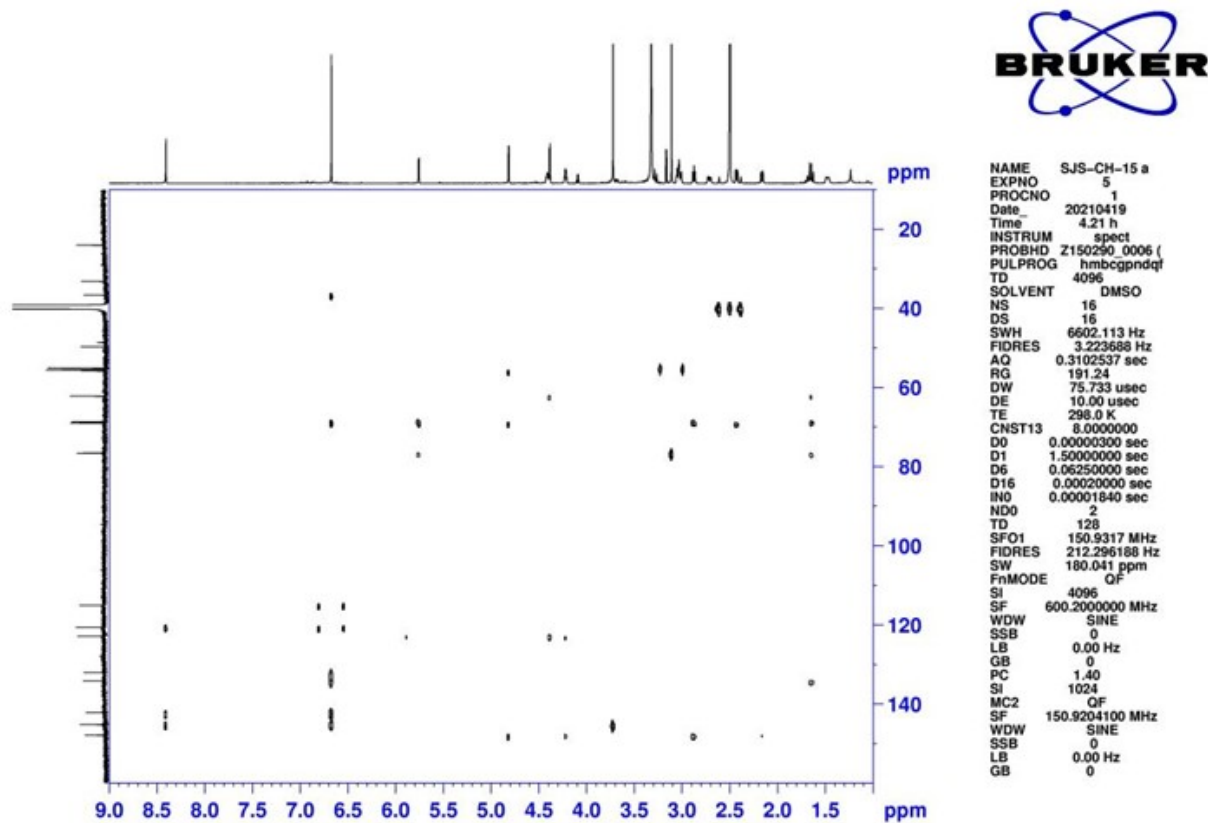

Figure S26. HMBC spectrum of compound 3 (600 MHz,  $\text{DMSO-}d_6$ )

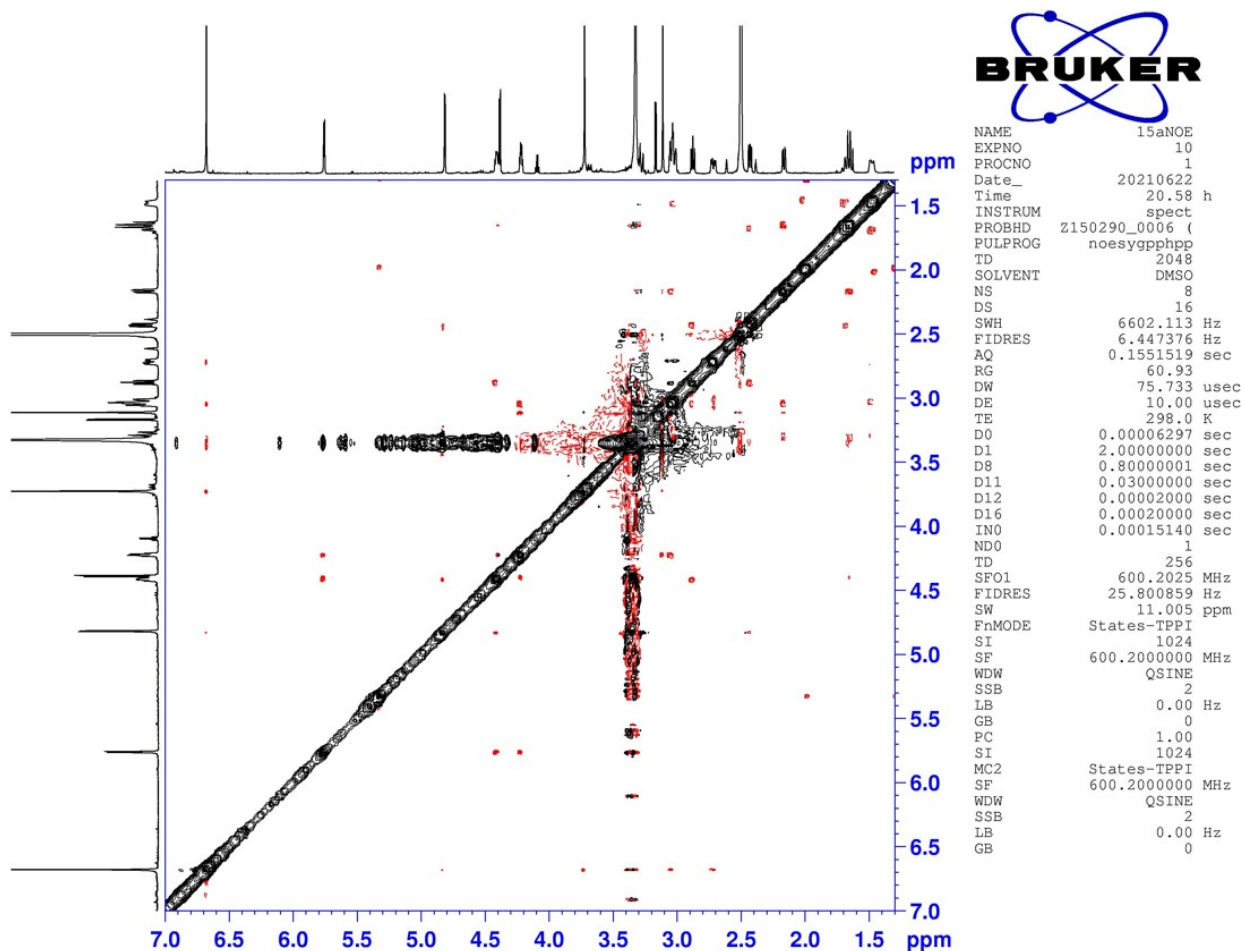

**Figure S27.** NOESY spectrum of compound **3** (600 MHz, DMSO-*d*<sub>6</sub>)



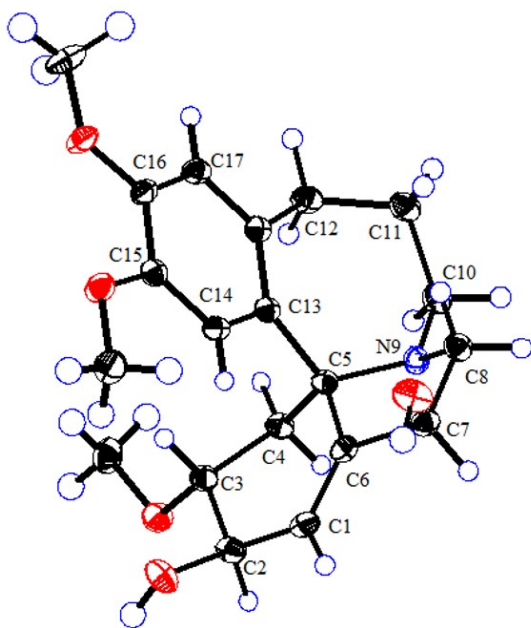

Figure S28. ORTEP drawing of compound 6

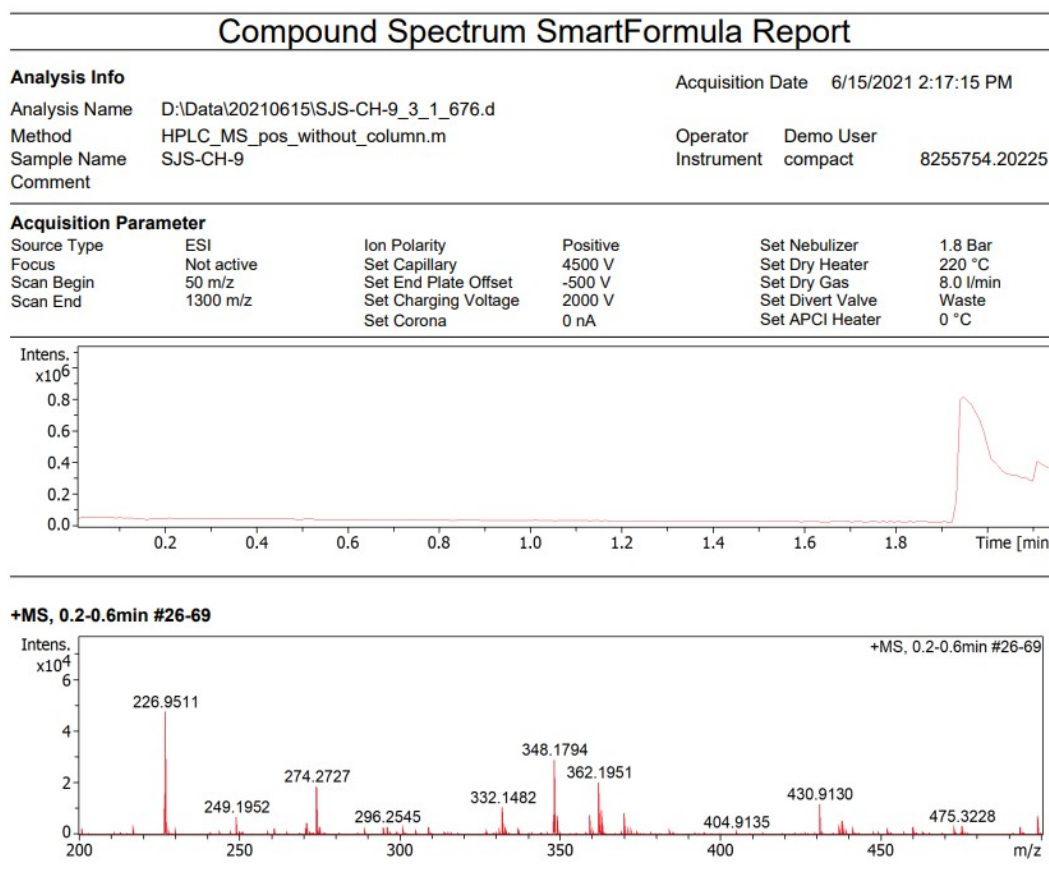

Figure S29. HRESIMS spectrum of 6

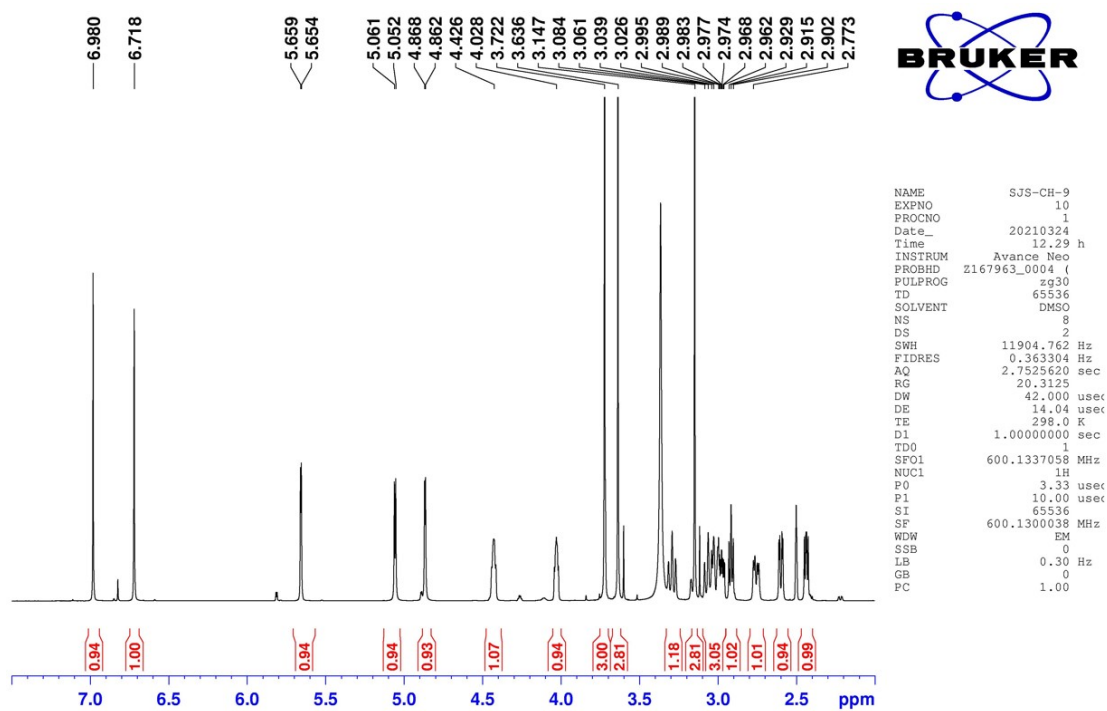

Figure S30. <sup>1</sup>H NMR spectrum of compound **6** (600 MHz, DMSO-*d*<sub>6</sub>)

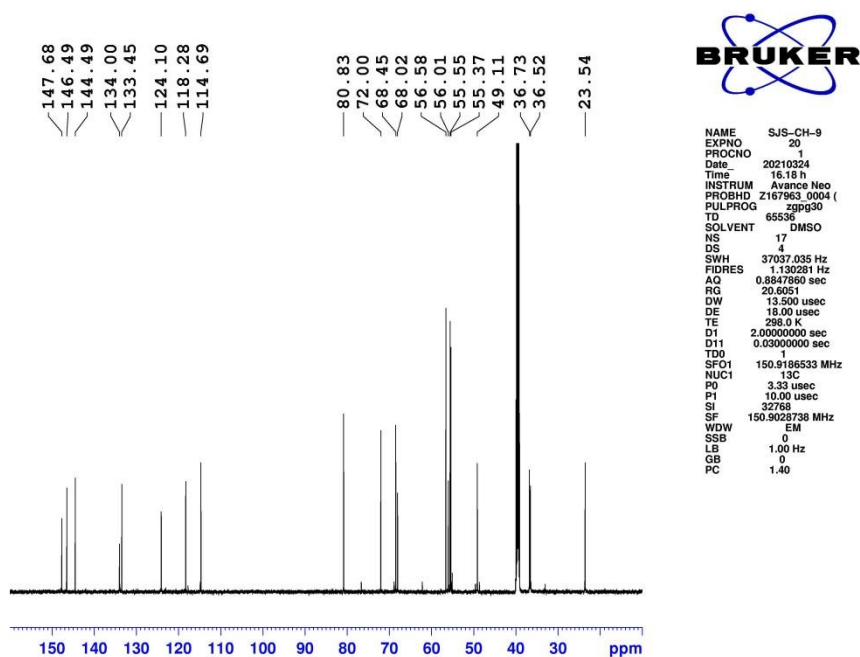

Figure S31. <sup>13</sup>C NMR spectrum of compound **6** (600 MHz, DMSO-*d*<sub>6</sub>)

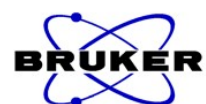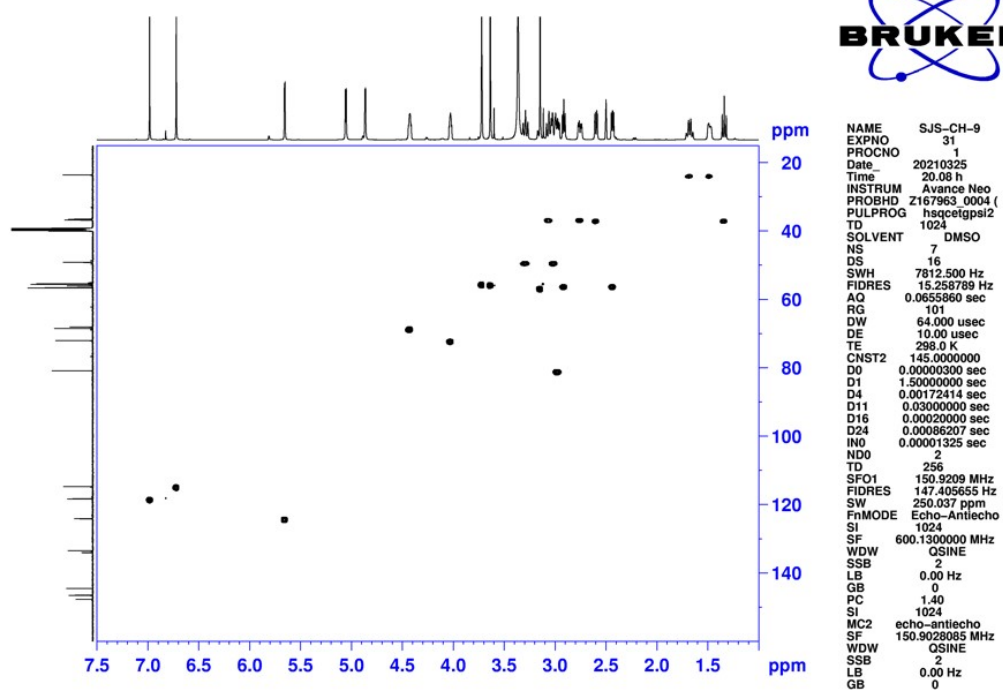

Figure S32. HSQC spectrum of compound 6

Elemental Composition Report

Single Mass Analysis

Tolerance = 5.0 mDa / DBE: min = -1.5, max = 50.0

Element prediction: Off

Number of isotope peaks used for i-FIT = 3

Monoisotopic Mass, Even Electron Ions

136 formula(e) evaluated with 1 results within limits (up to 50 best isotopic matches for each mass)

Elements Used:

C: 17-17 H: 0-880 N: 0-7 O: 0-200

SZJ-D-12 86 (0.492)

1: TOF MS ES+

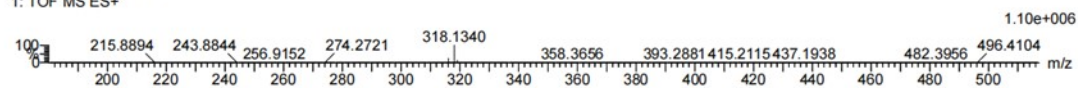

Minimum: -1.5  
Maximum: 50.0

| Mass     | Calc. Mass | mDa  | PPM  | DBE | i-FIT | Norm | Conf (%) | Formula      |
|----------|------------|------|------|-----|-------|------|----------|--------------|
| 318.1340 | 318.1341   | -0.1 | -0.3 | 8.5 | 658.2 | n/a  | n/a      | C17 H20 N 05 |

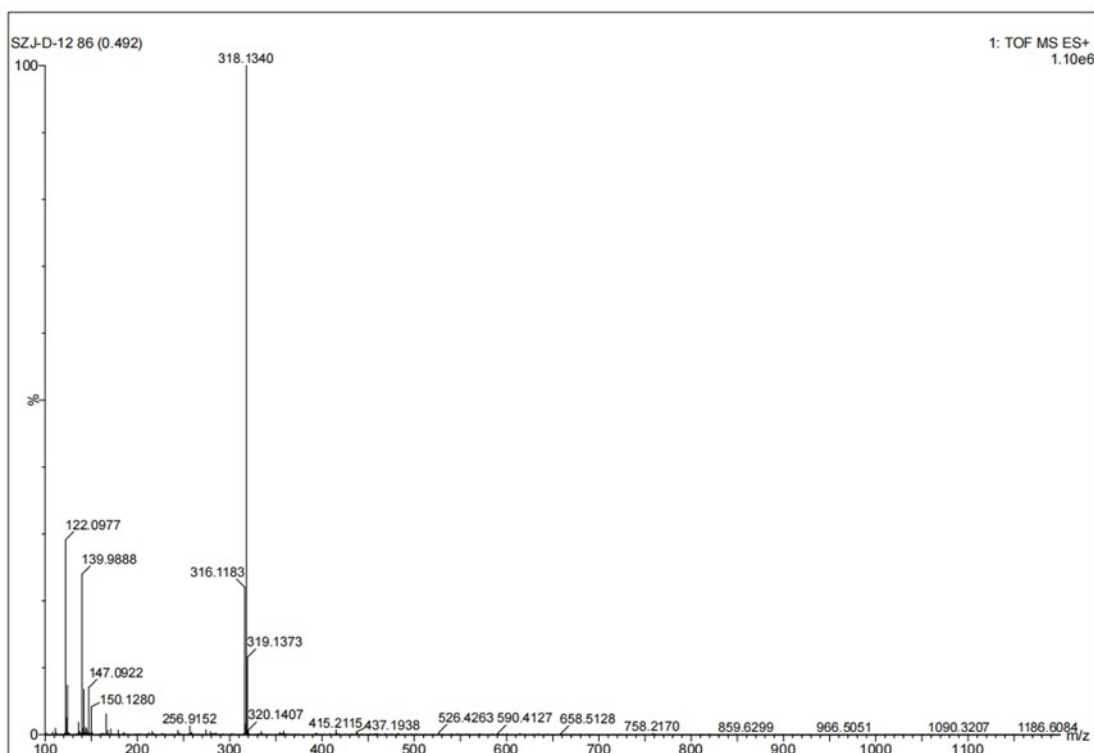

Figure S33. HRESIMS spectrum of 11

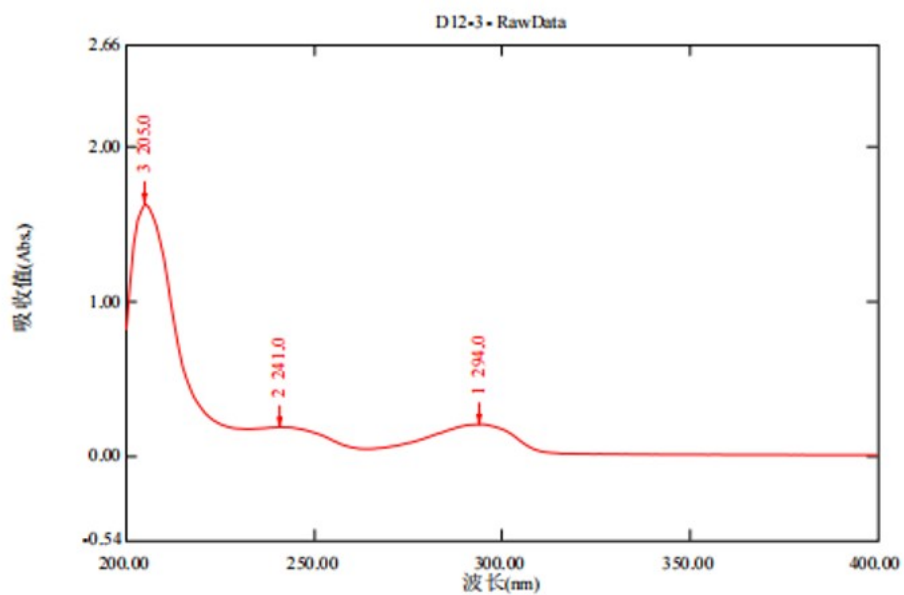

Figure S34. UV spectrum of 11

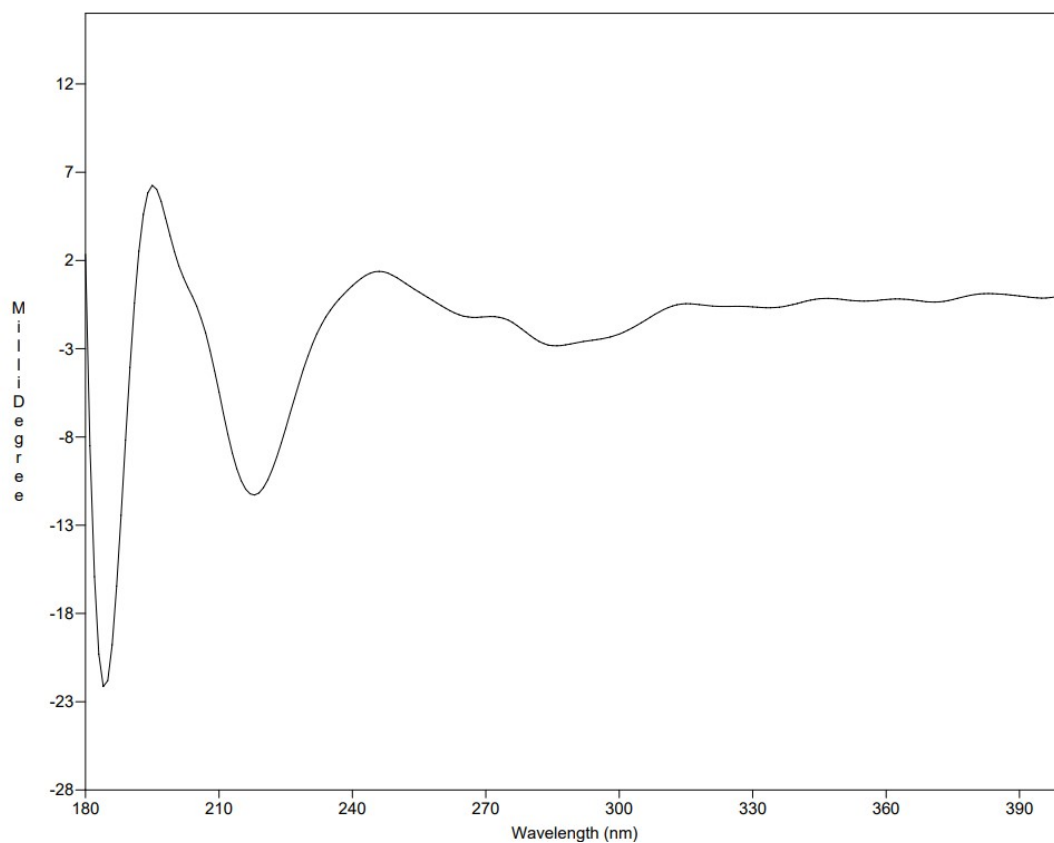

Figure S35. Experimental ECD spectrum of 11

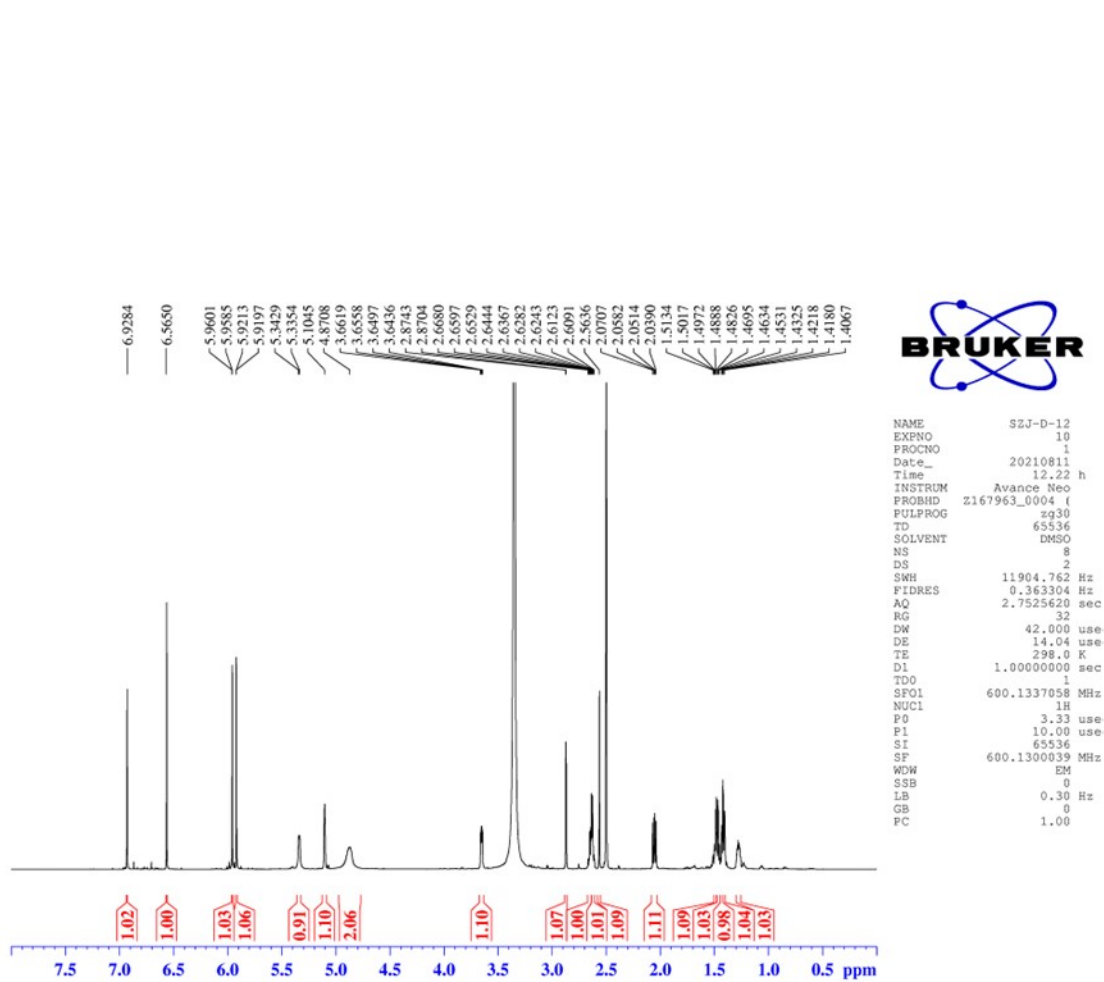

Figure S36. <sup>1</sup>H NMR spectrum of compound **11** (600 MHz, DMSO-*d*<sub>6</sub>)

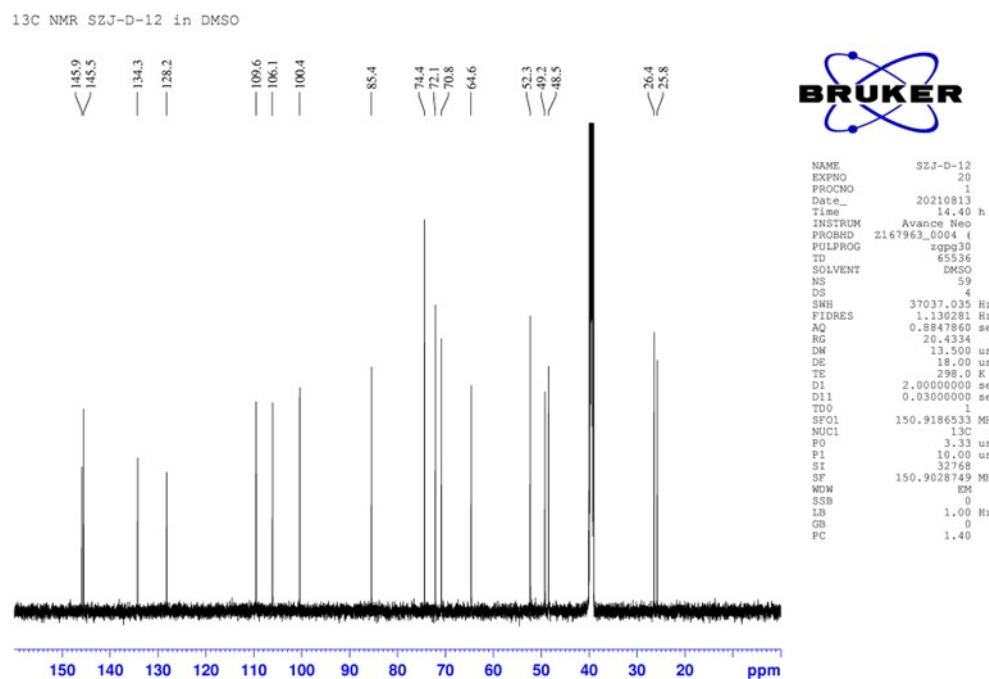

Figure S37. <sup>13</sup>C NMR spectrum of compound **11** (150 MHz, DMSO-*d*<sub>6</sub>)

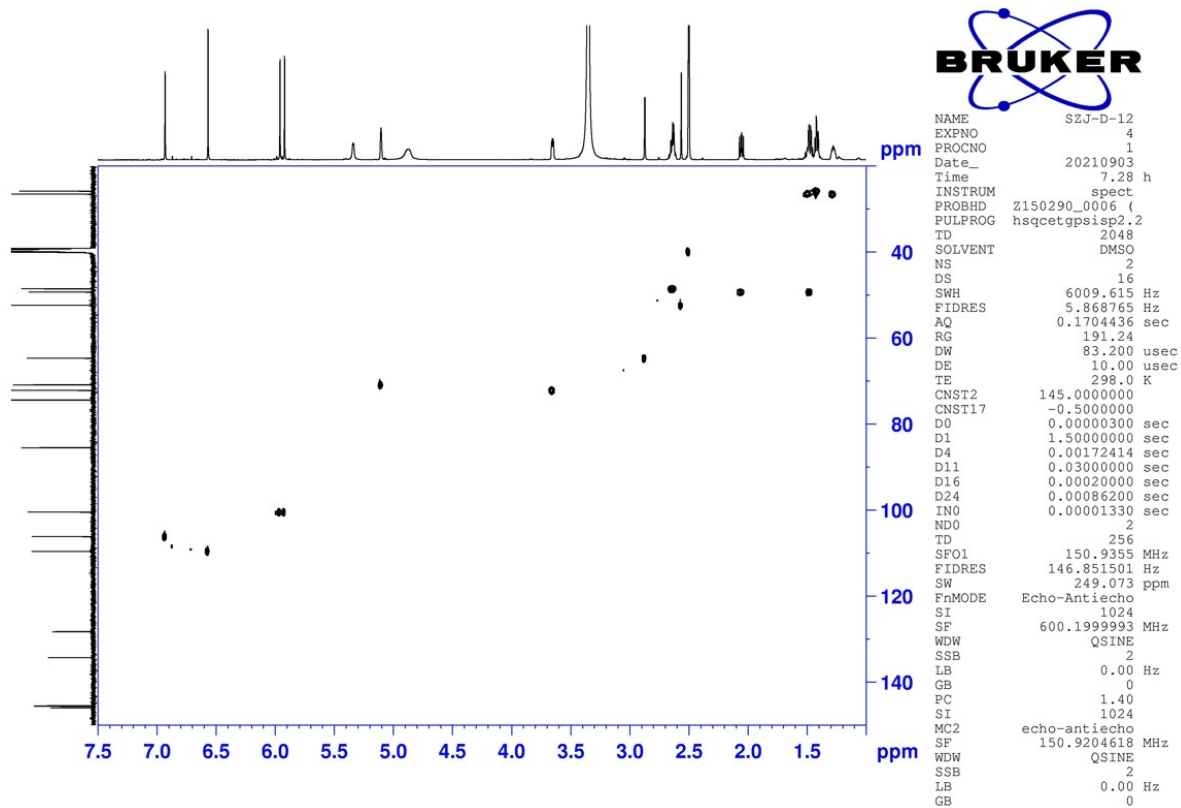

Figure S38. HSQC spectrum of compound 11 (600 MHz, DMSO- $d_6$ )

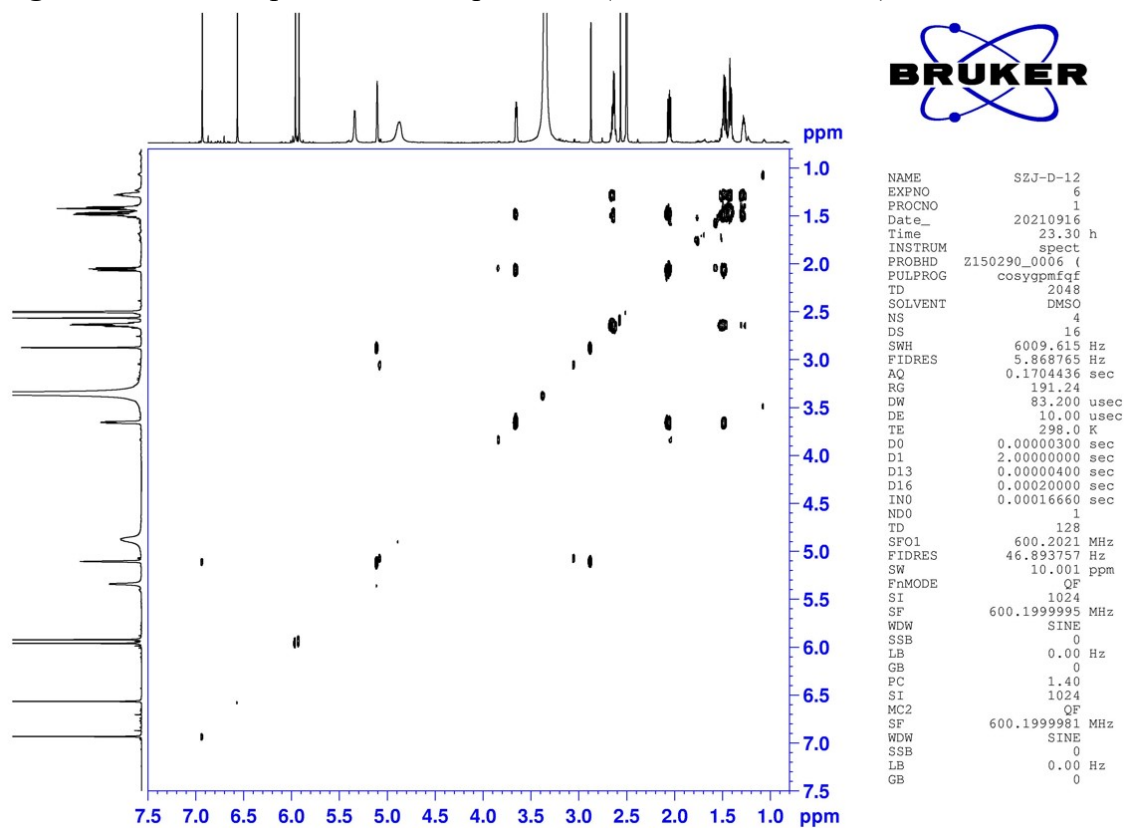

Figure S39.  $^1\text{H}$ - $^1\text{H}$  COSY spectrum of compound 11 (600 MHz, DMSO- $d_6$ )

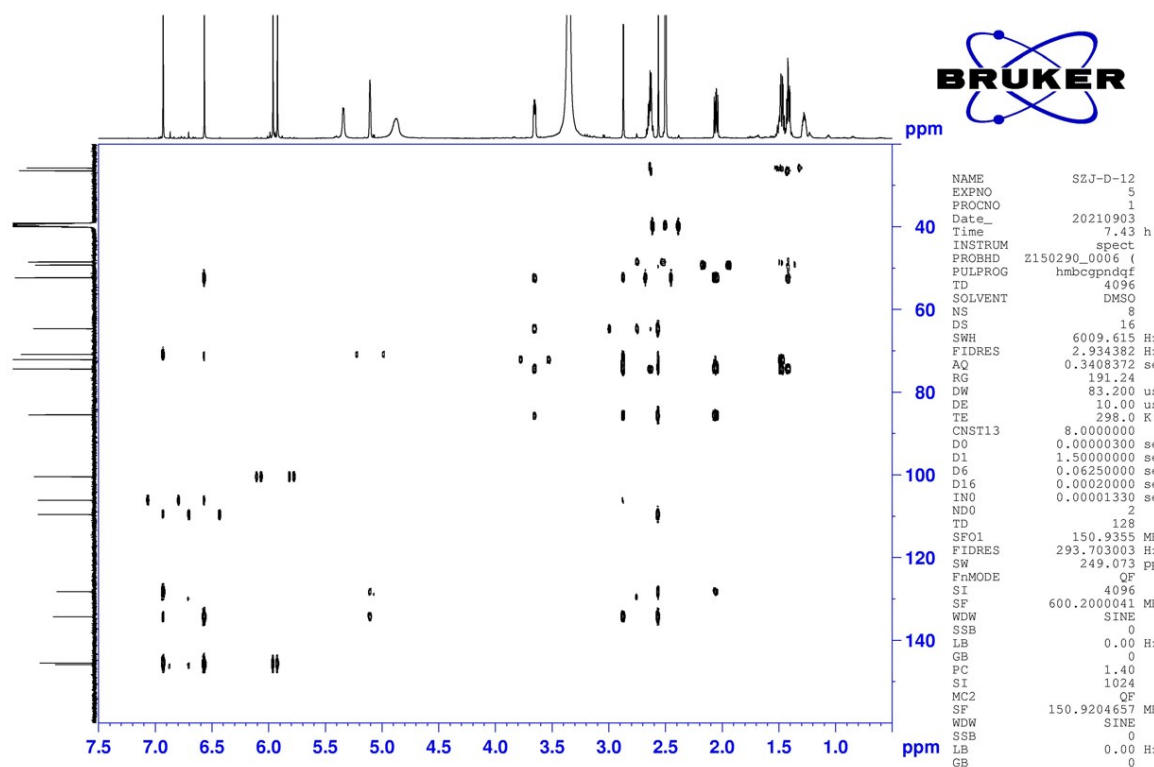

Figure S40. HMBC spectrum of compound **11** (600 MHz, DMSO-*d*<sub>6</sub>)

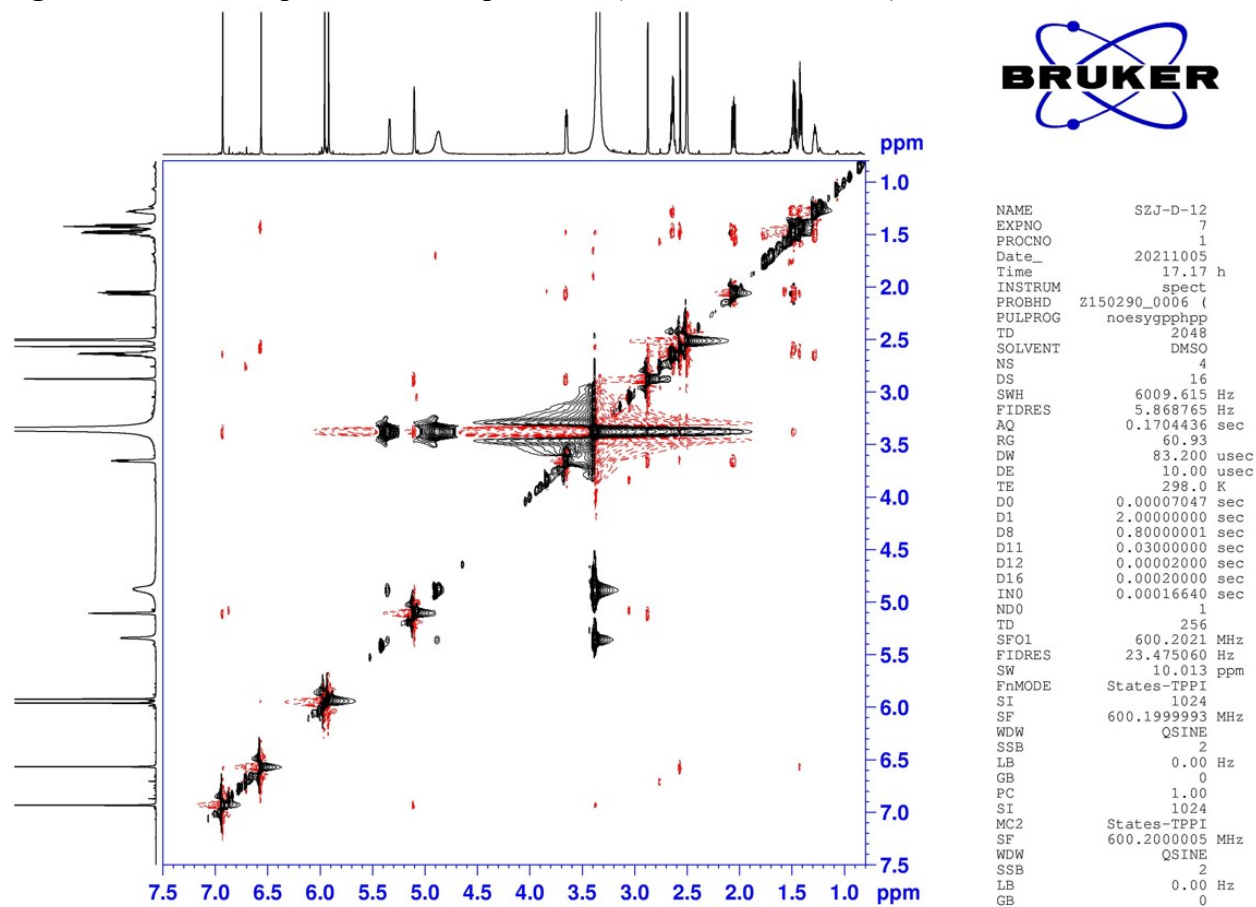

Figure S41. NOESY spectrum of compound **11** (600 MHz, DMSO-*d*<sub>6</sub>)



## Qualitative Analysis Report

|                        |                        |               |                      |
|------------------------|------------------------|---------------|----------------------|
| Data Filename          | SJS-ZJ-5-POS.d         | Sample Name   | Sample29             |
| Sample Type            | Sample                 | Position      | P1-D2                |
| Instrument Name        | Instrument 1           | User Name     |                      |
| Acq Method             | default-20191128-pos.m | Acquired Time | 1/10/2020 2:50:17 PM |
| IRM Calibration Status | All Ions Missed        | DA Method     | default.m            |
| Comment                |                        |               |                      |
| Sample Group           | Info.                  |               |                      |

### User Spectra

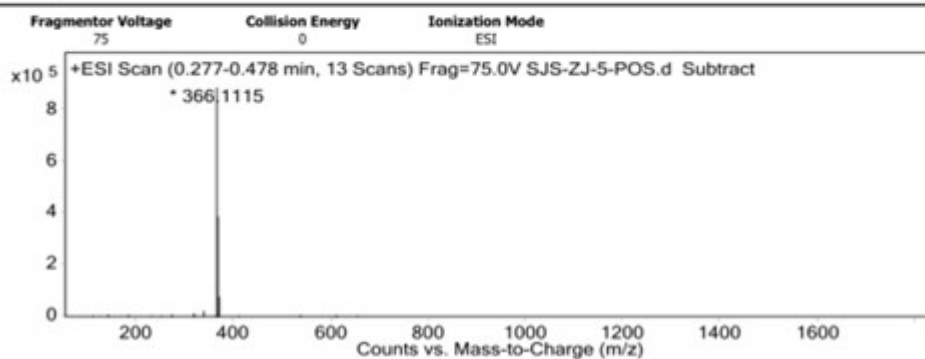

Figure S42. HRESIMS spectrum of 13

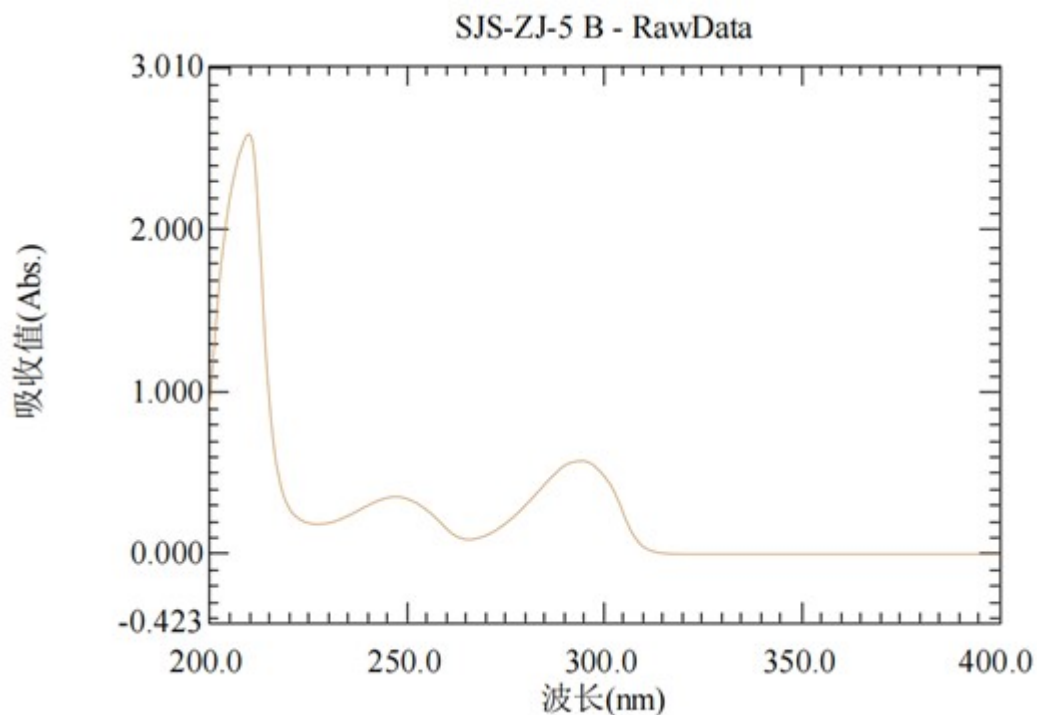

Figure S43. UV spectrum of compound 13

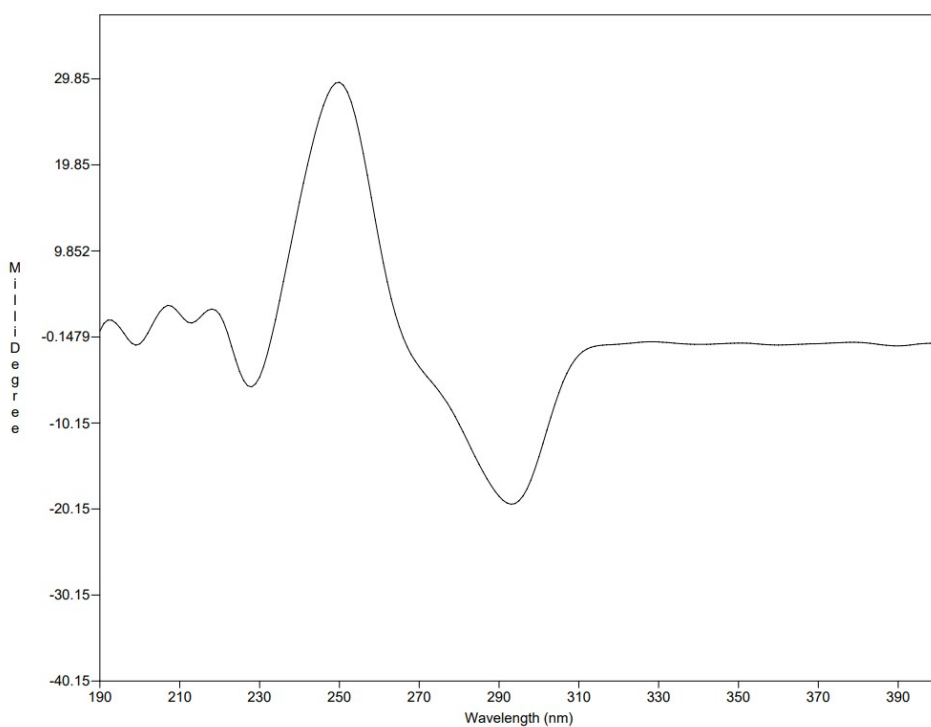

Figure S44. Experimental ECD spectrum of 13

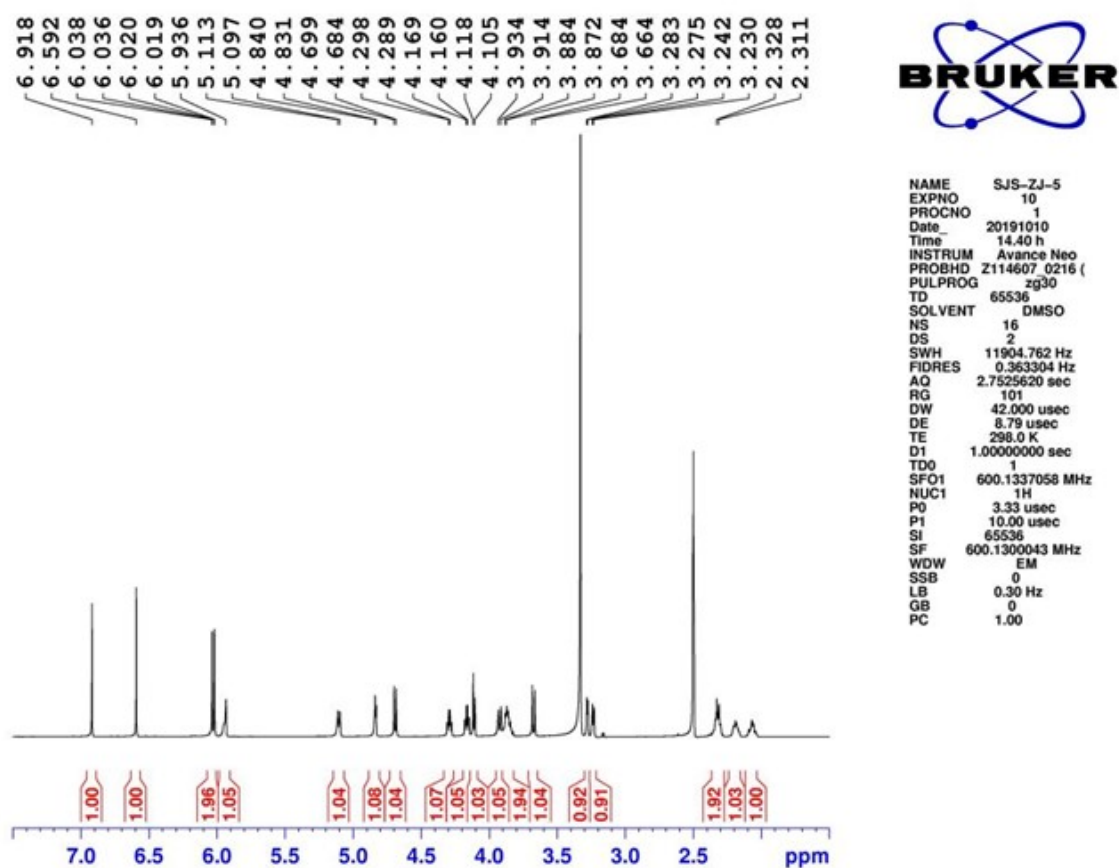

Figure S45.  $^1\text{H}$  NMR spectrum of compound 13 (600 MHz,  $\text{DMSO}-d_6$ )

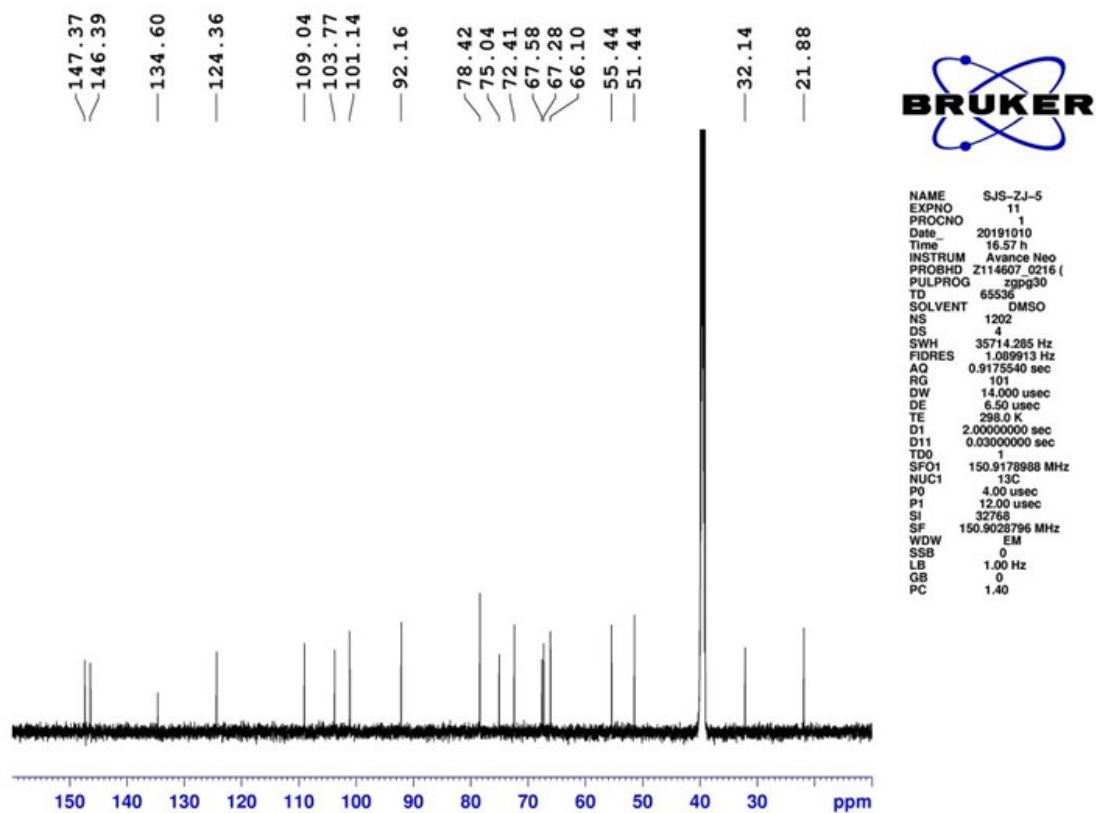

Figure S46.  $^{13}\text{C}$  NMR spectrum of compound **13** (150 MHz,  $\text{DMSO-}d_6$ )

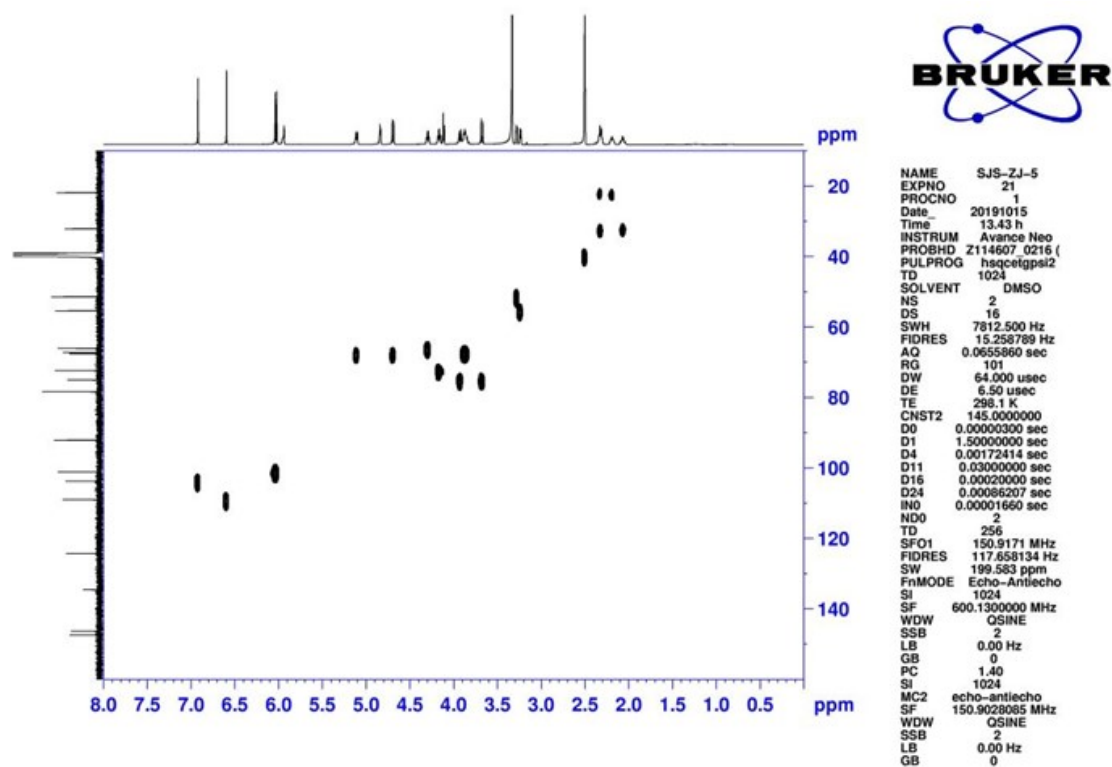

Figure S47. HSQC spectrum of compound **13** (600 MHz,  $\text{DMSO-}d_6$ )

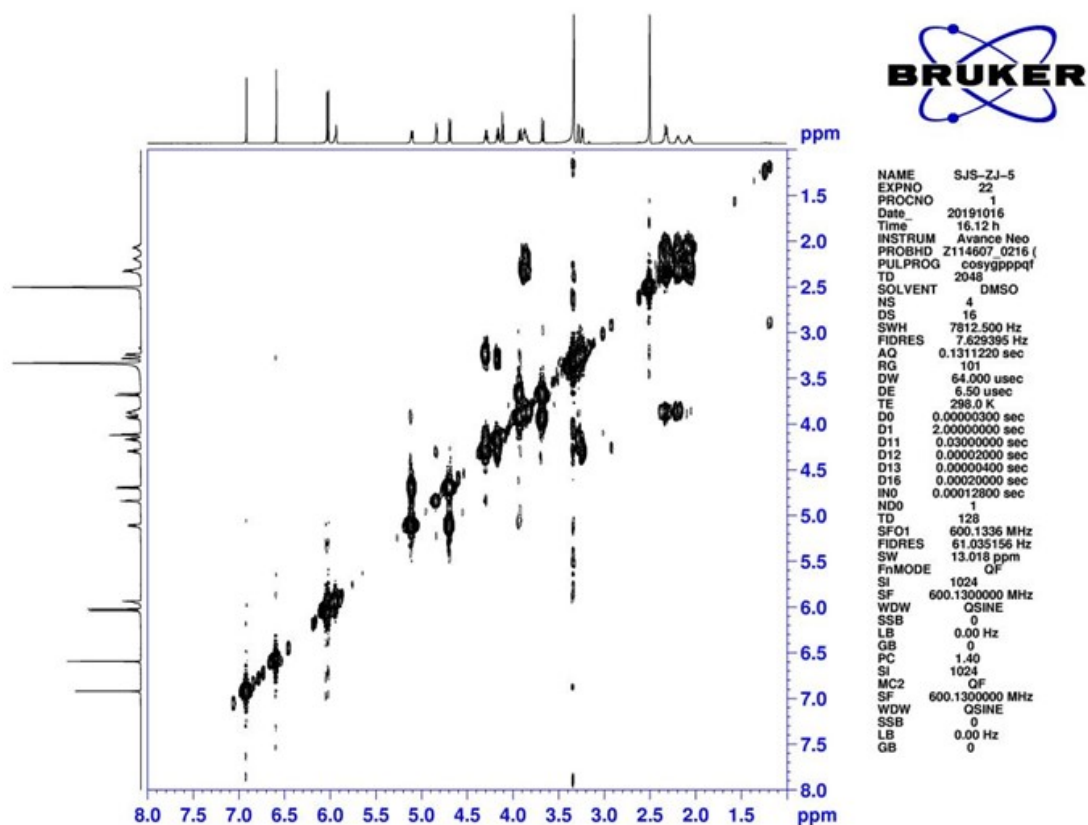

Figure S48.  $^1\text{H}$ - $^1\text{H}$  COSY spectrum of compound **13** (600 MHz,  $\text{DMSO-}d_6$ )

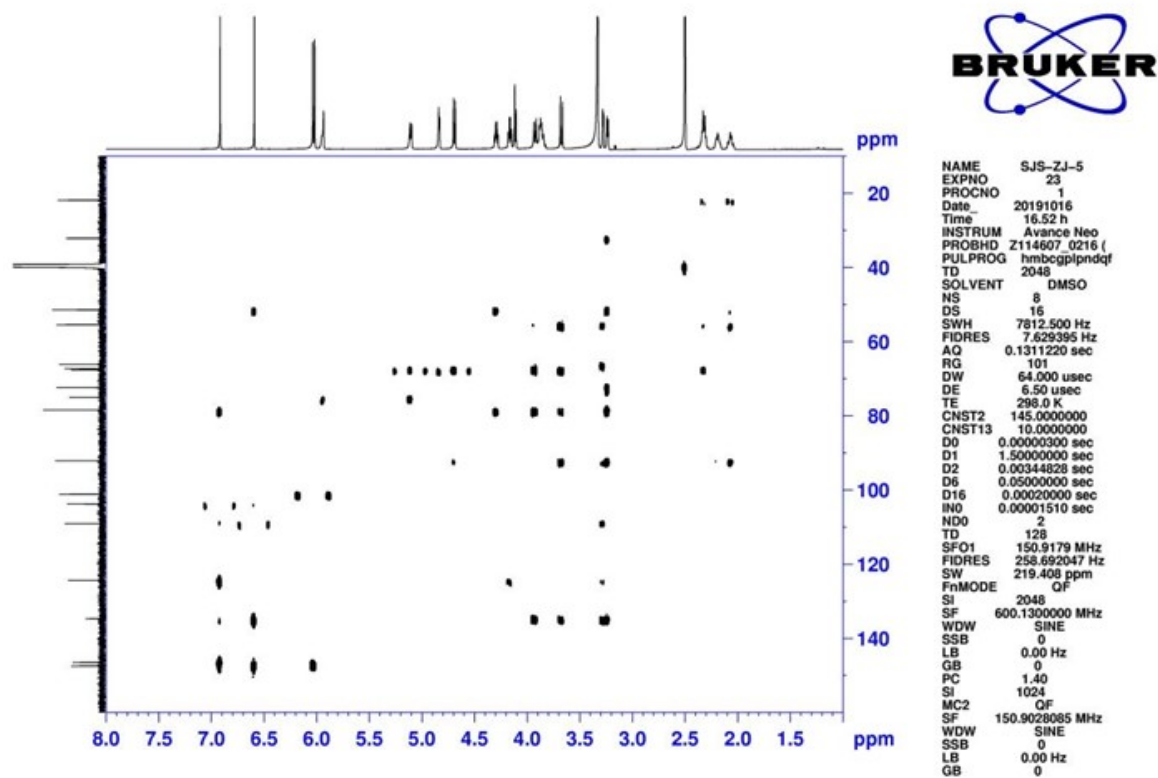

Figure S49. HMBC spectrum of compound **13** (600 MHz,  $\text{DMSO-}d_6$ )

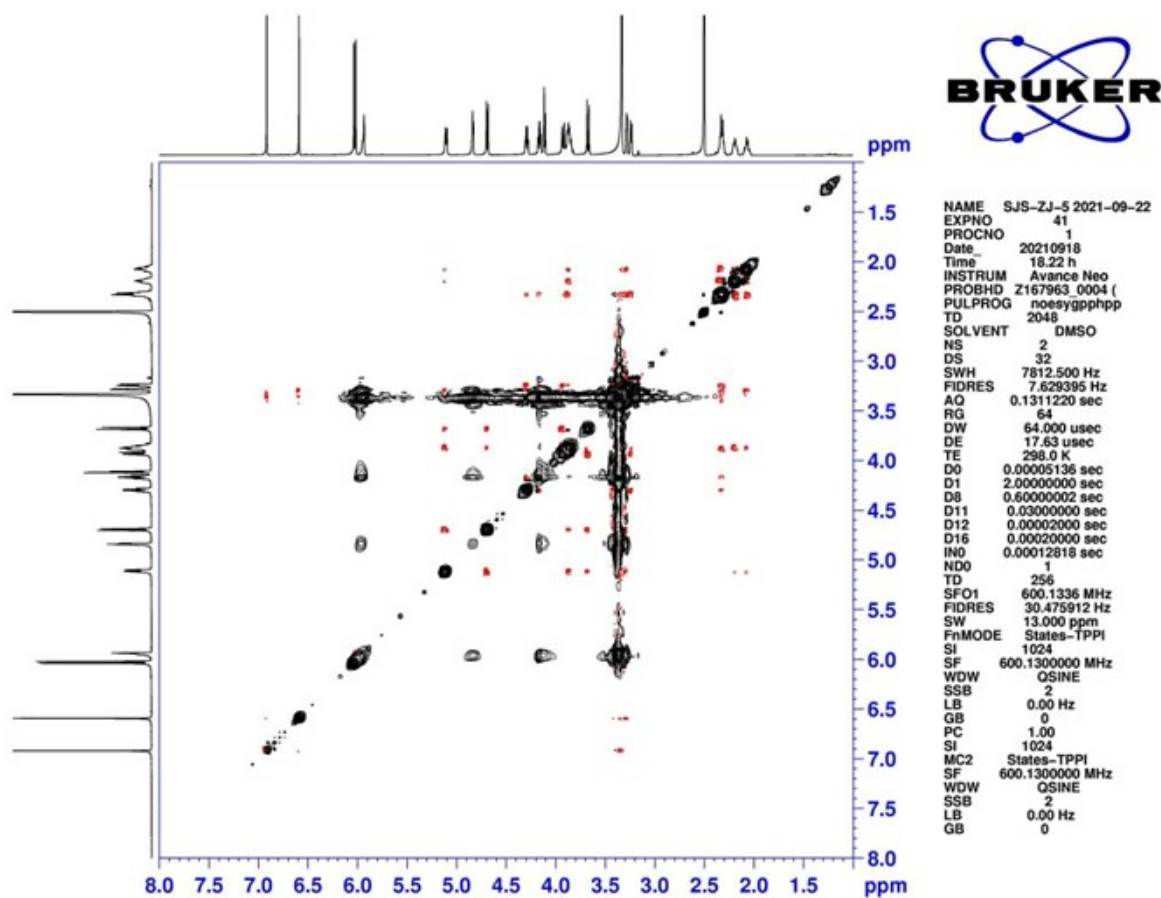

Figure S50. NOESY spectrum of compound 13 (600 MHz, DMSO- $d_6$ )

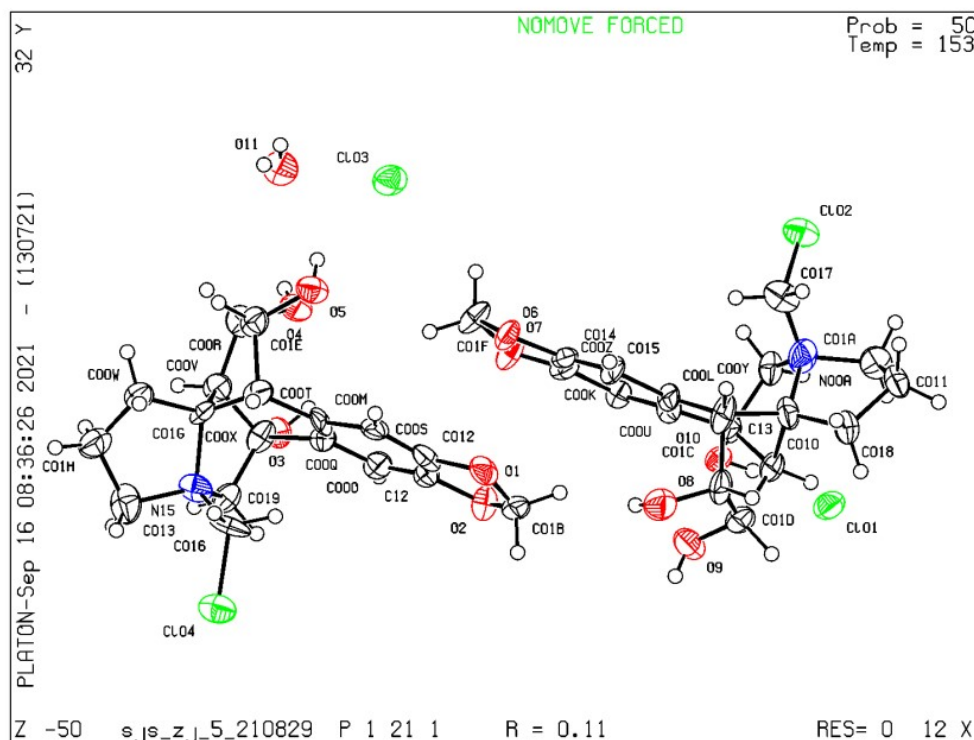

Figure S51. ORTEP drawing of compound 13

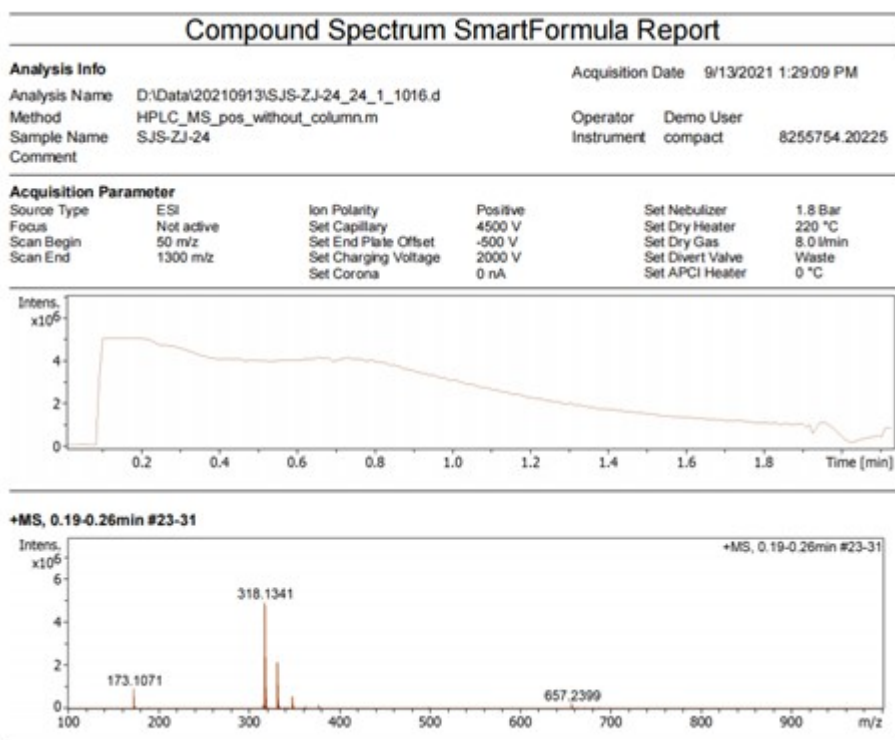

**Figure S52.** HRESIMS date of 14

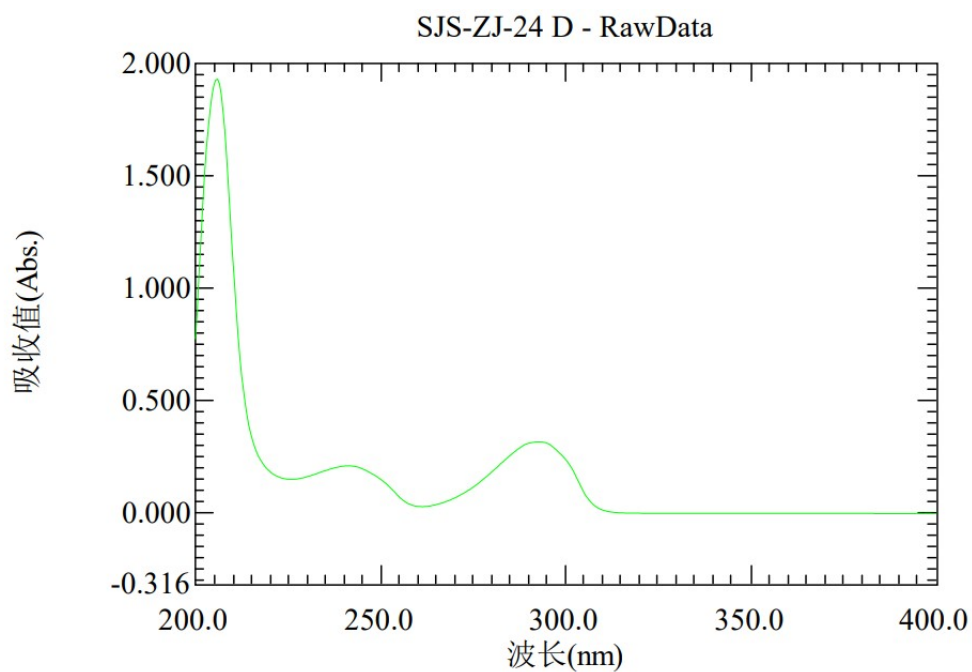

**Figure S53.** UV spectrum of 14

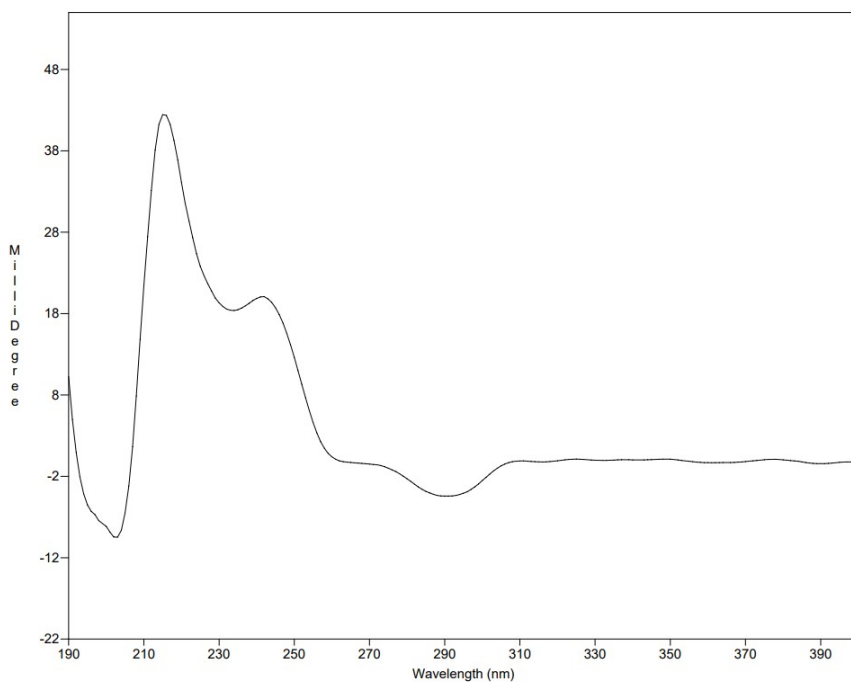

Figure S54. Experimental ECD spectrum of 14

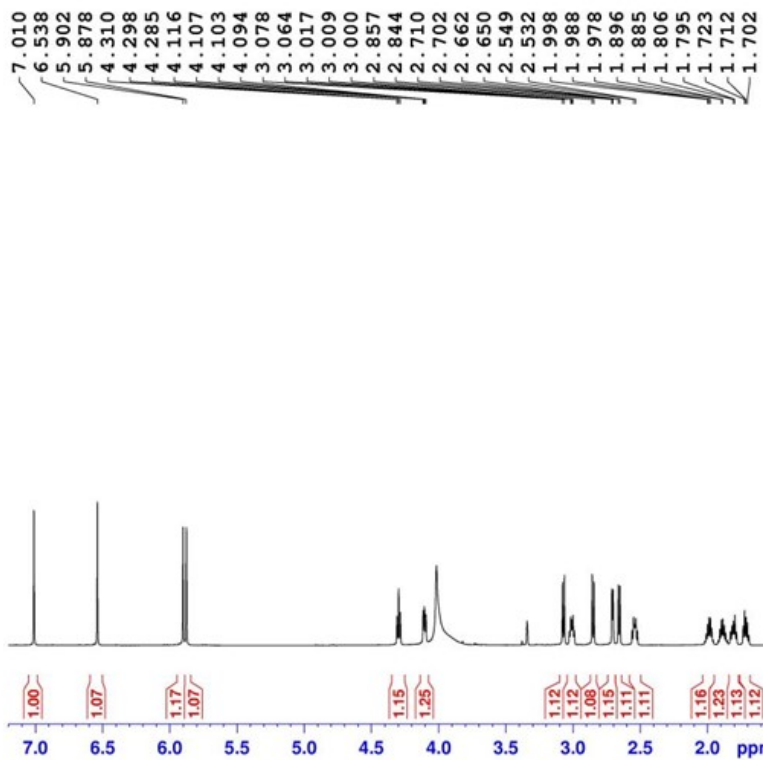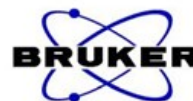

```

NAME SJS-ZJ-24C
EXPNO 10
PROCNO 1
Date_ 20211117
Time 13.09 h
INSTRUM Avance Neo
PROBHD Z167963_0004 (
PULPROG zg30
TD 65536
SOLVENT MeOD
NS 8
DS 2
SWH 11904.762 Hz
FIDRES 0.363304 Hz
AQ 2.7525620 sec
RG 32
DW 42.000 usec
DE 14.04 usec
TE 298.0 K
D1 1.00000000 sec
TD0 1
SFO1 600.1337058 MHz
NUC1 1H
PQ 3.33 usec
P1 10.00 usec
SI 65536
SF 600.1299933 MHz
WDW EM
SSB 0
LB 0.30 Hz
GB 0
PC 1.00

```

Figure S55. <sup>1</sup>H NMR spectrum of compound 14 (CDCl<sub>3</sub>/CD<sub>3</sub>OD (4:1) at 310 K)

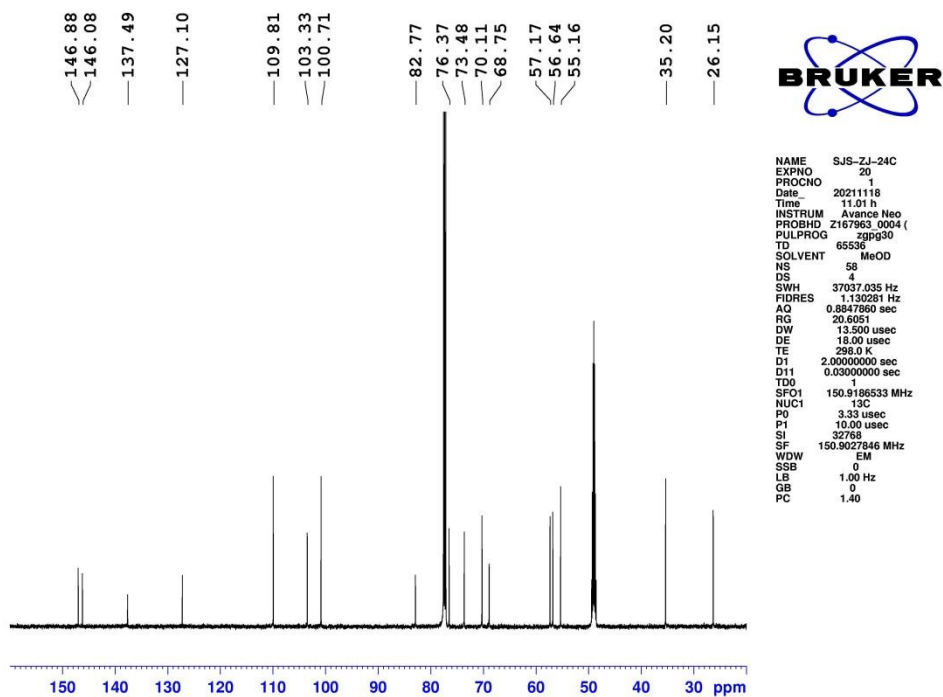

Figure S56.  $^{13}\text{C}$  NMR spectrum of compound **14** ( $\text{CDCl}_3/\text{CD}_3\text{OD}$  (4:1) at 310 K)

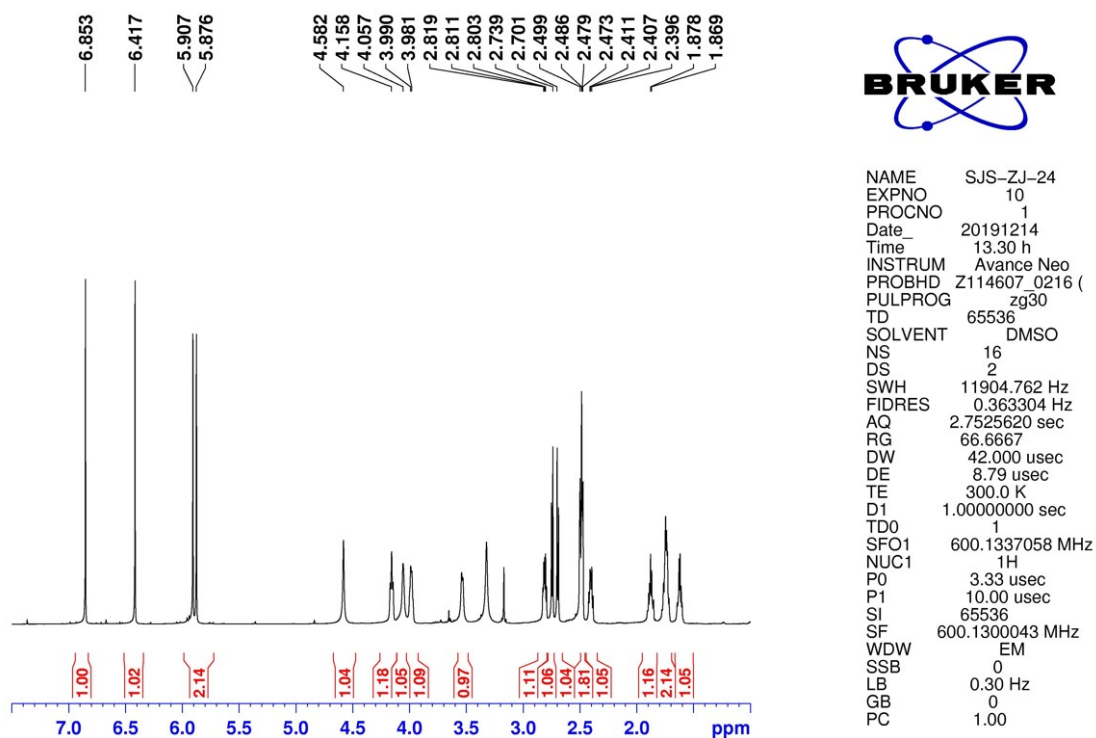

Figure S57.  $^1\text{H}$  NMR spectrum of compound **14** (600 MHz,  $\text{DMSO}-d_6$ )



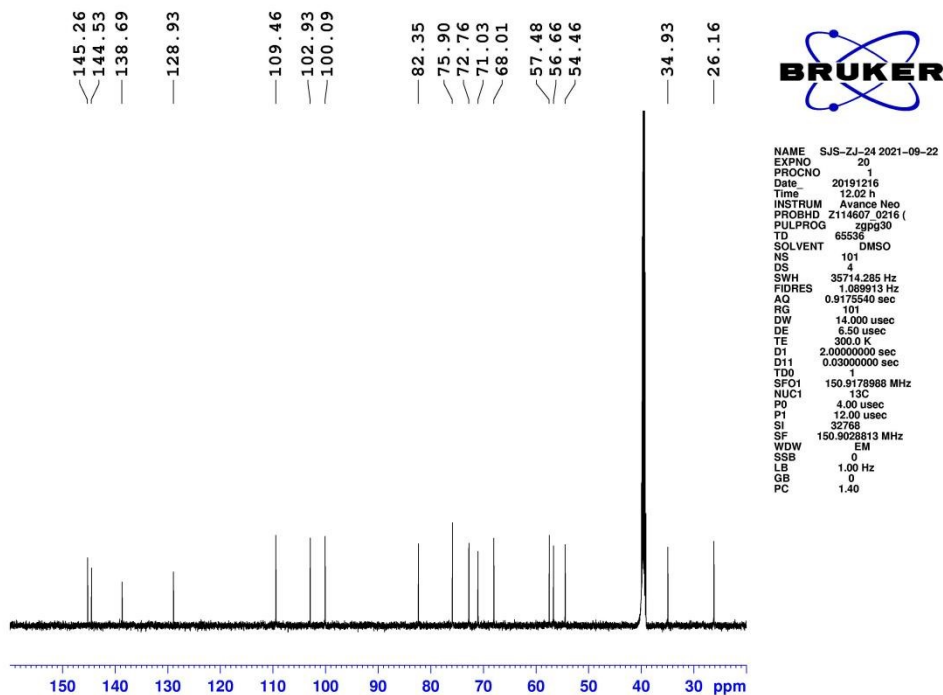

Figure S58.  $^{13}\text{C}$  NMR spectrum of compound **14** (150 MHz,  $\text{DMSO-}d_6$ )

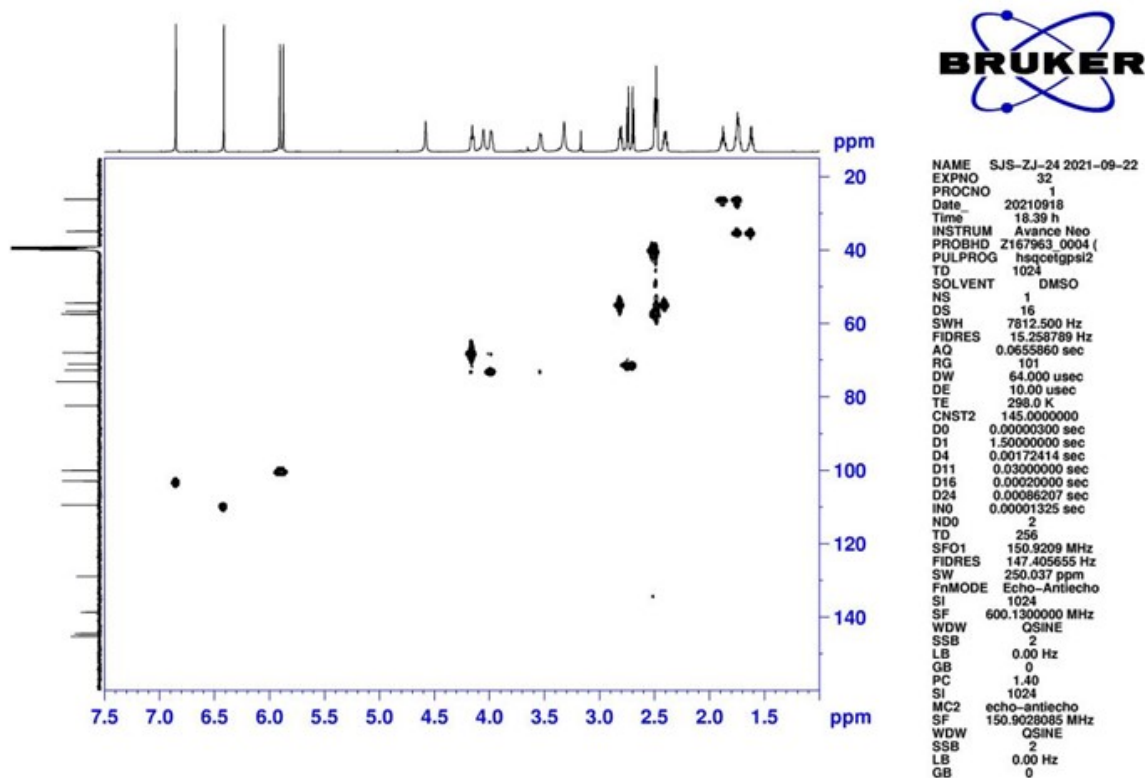

Figure S59. HSQC spectrum of compound **14** (600 MHz,  $\text{DMSO-}d_6$ )

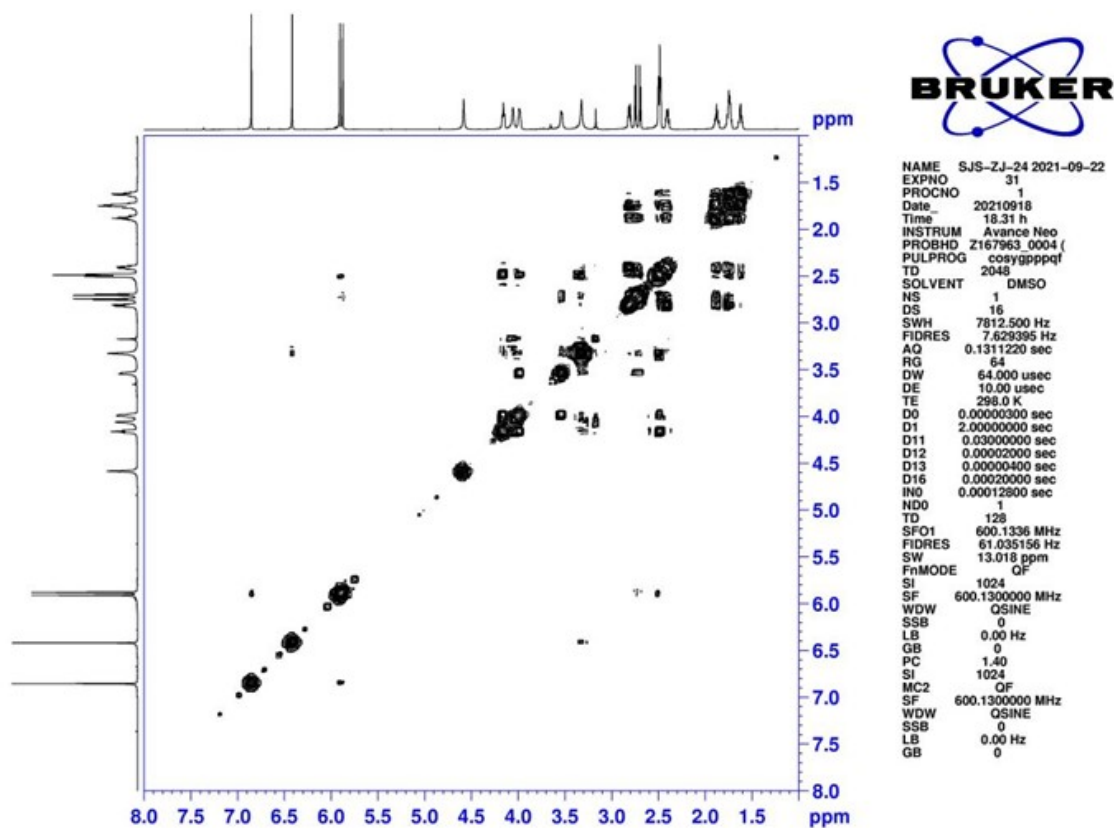

Figure S60.  $^1\text{H}$ - $^1\text{H}$  COSY spectrum of compound **14** (600 MHz,  $\text{DMSO-}d_6$ )

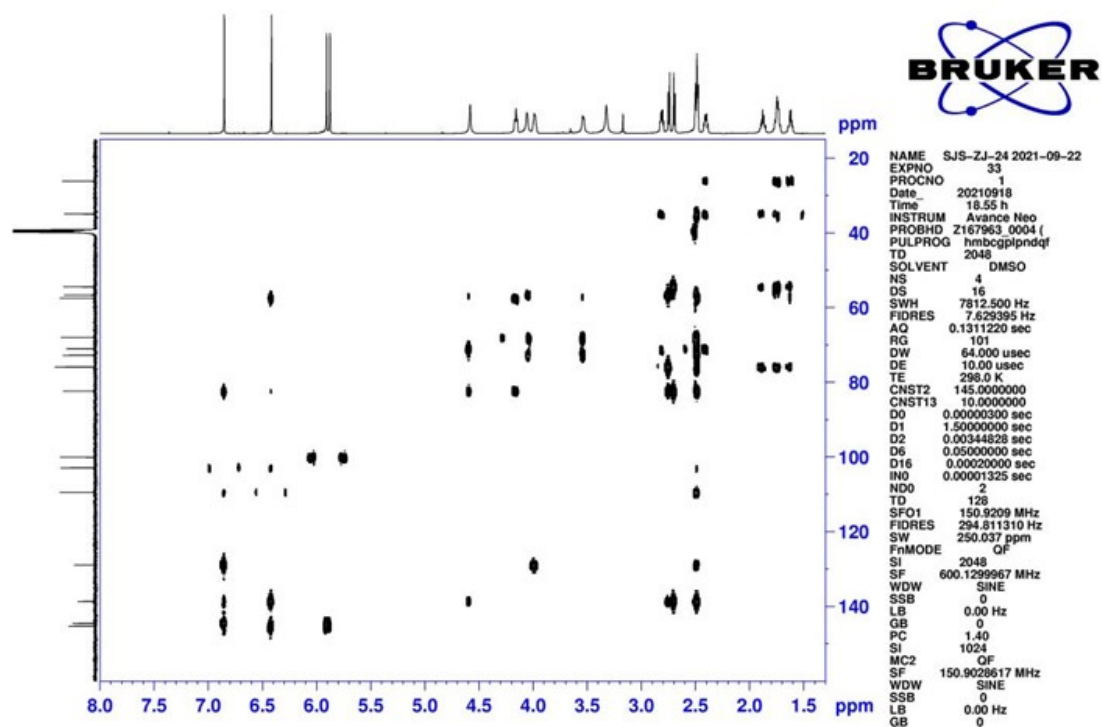

Figure S61. HMBC spectrum of compound **14** (600 MHz,  $\text{DMSO-}d_6$ )

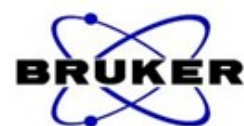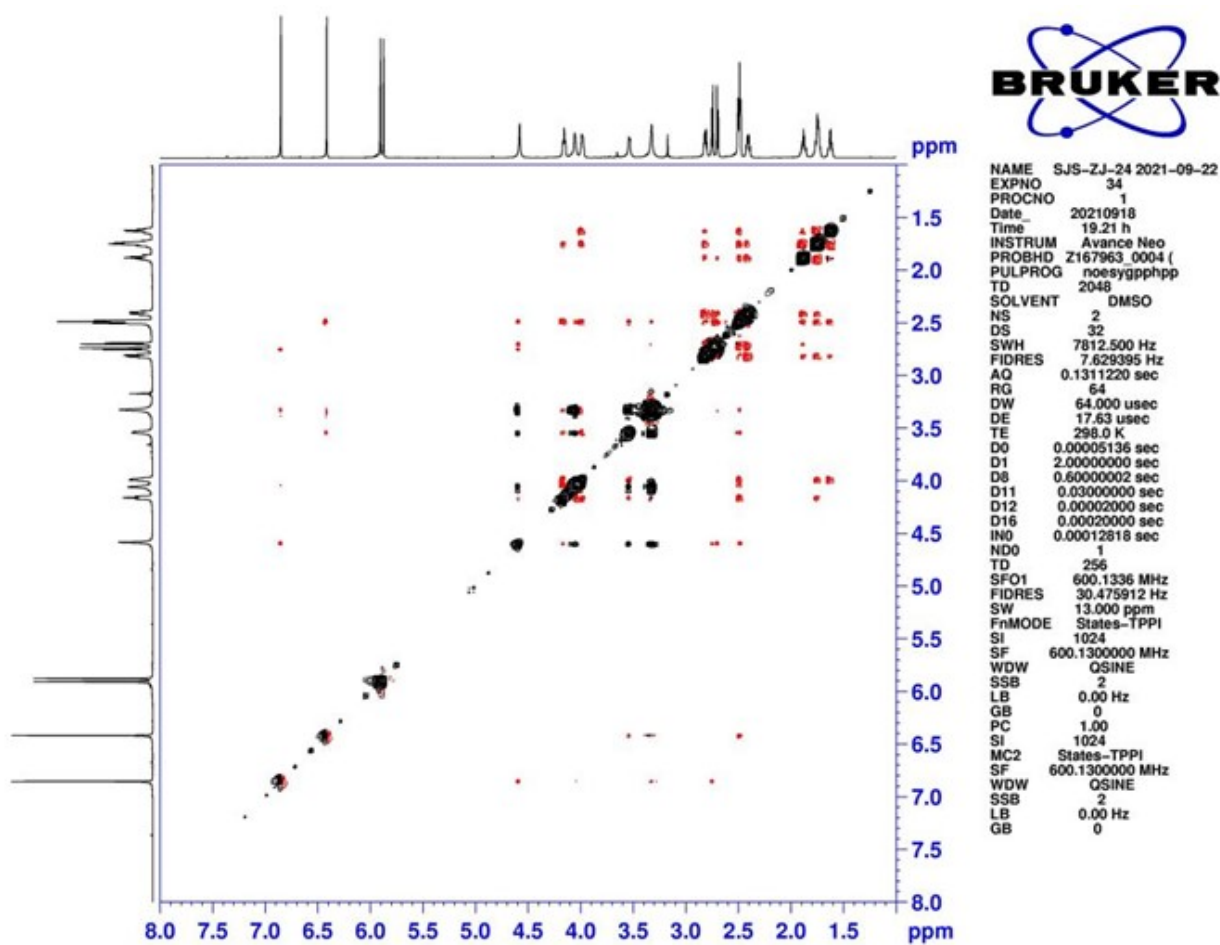

Figure S62. NOESY spectrum of compound 14 (600 MHz, DMSO- $d_6$ )

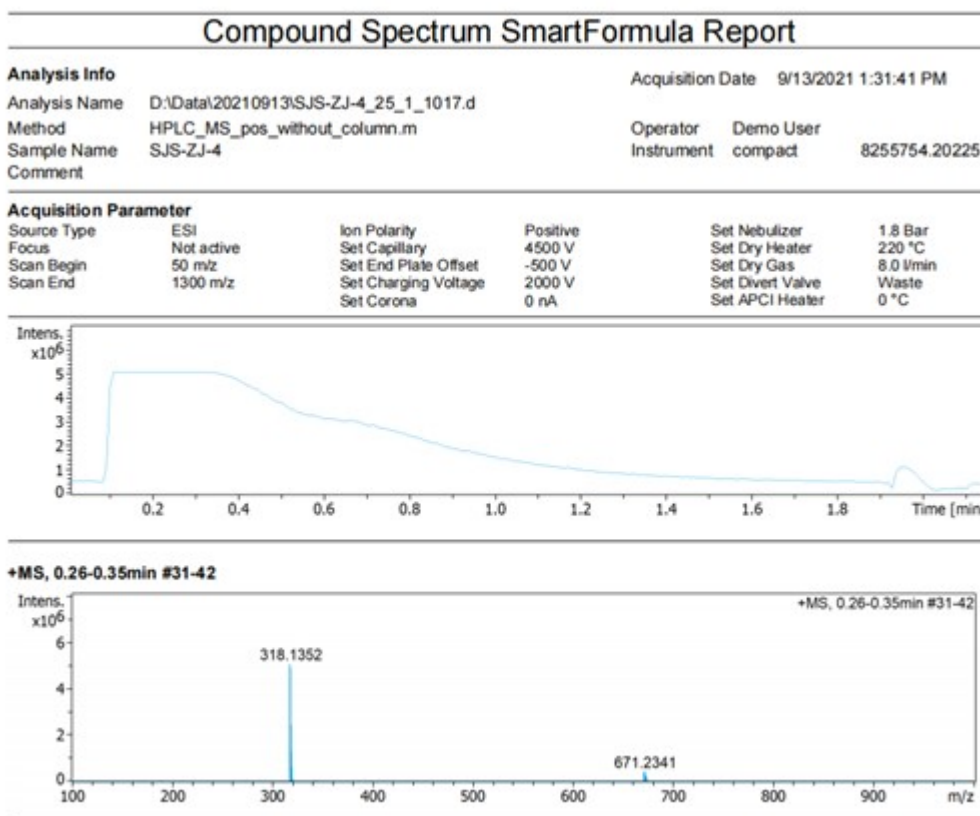

**Figure S63.** HRESIMS spectrum of **14a**

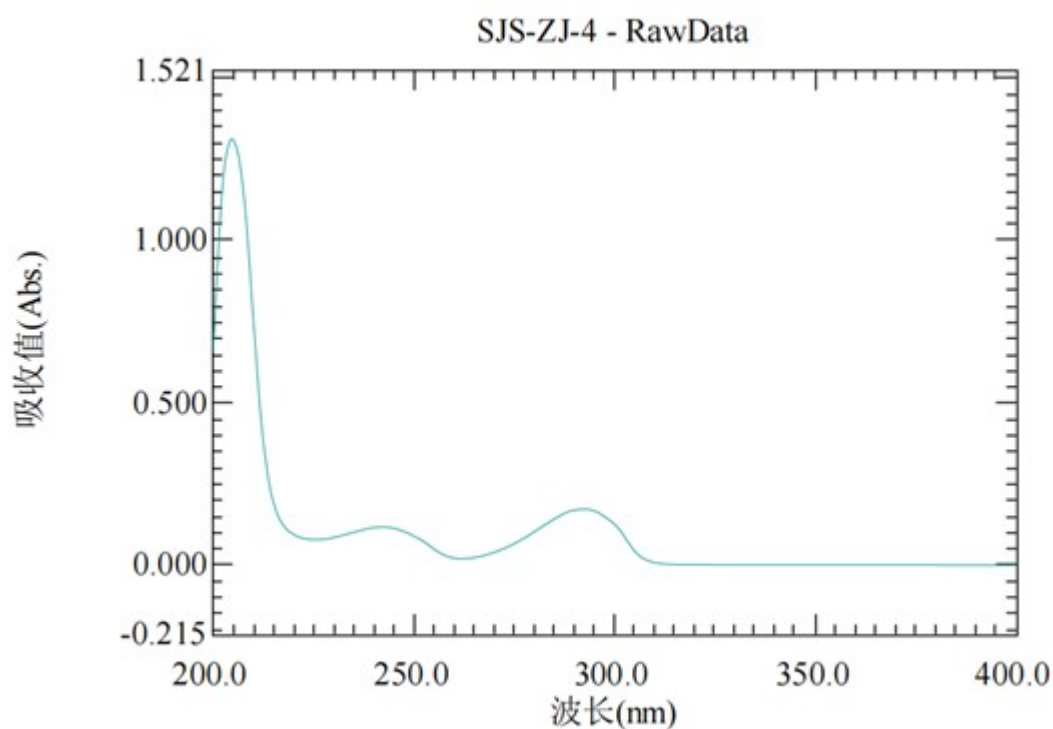

**Figure S64.** UV spectrum of **14a**

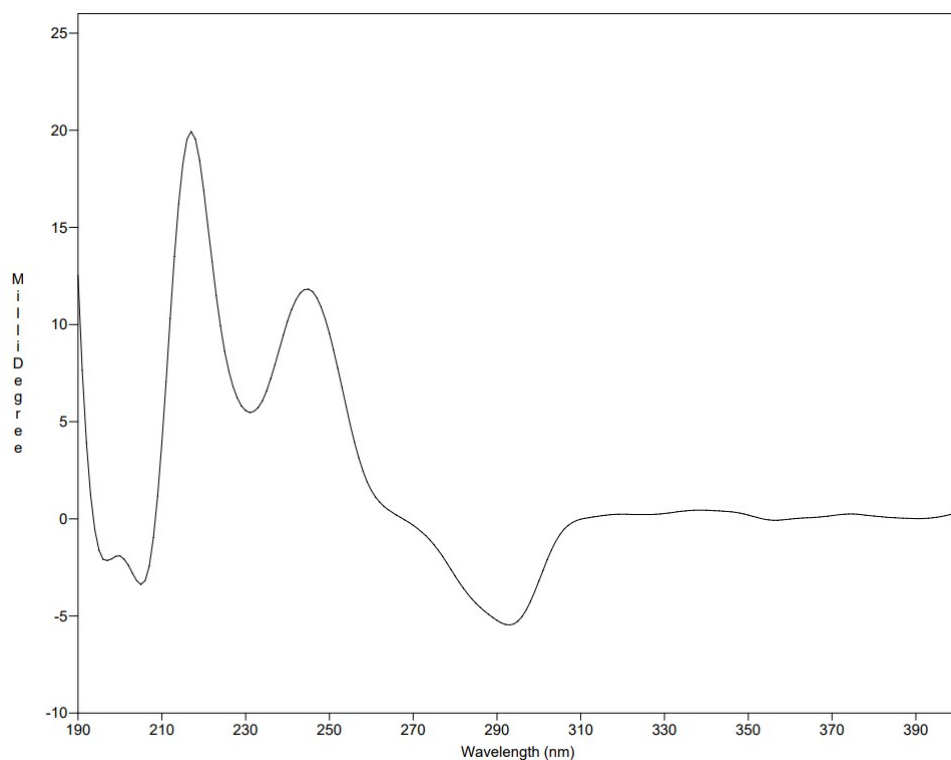

Figure S65. Experimental ECD spectrum of 14a

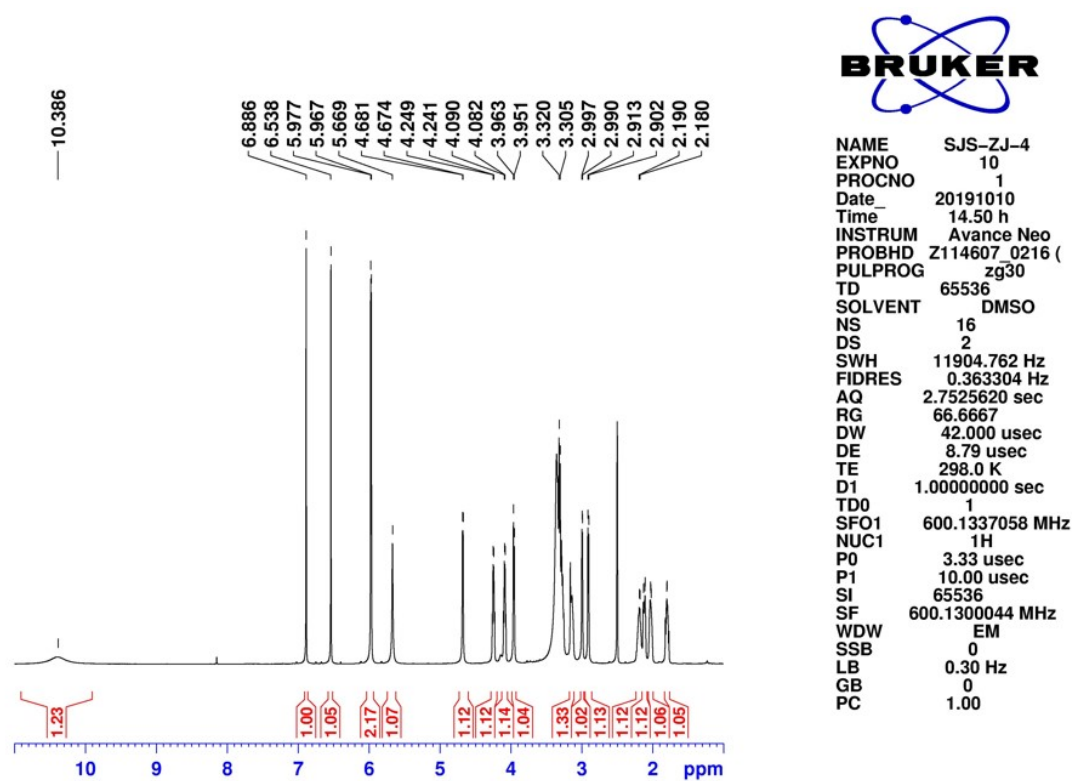

Figure S66.  $^1\text{H}$  NMR spectrum of compound 14a (600 MHz,  $\text{DMSO}-d_6$ )

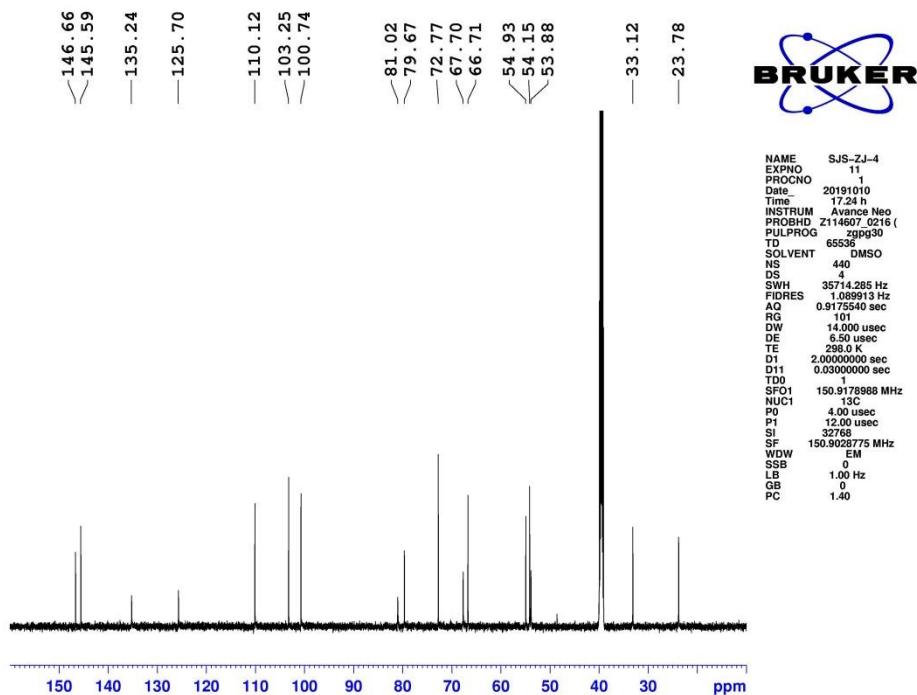

Figure S67.  $^{13}\text{C}$  NMR spectrum of compound **14a** (150 MHz,  $\text{DMSO-}d_6$ )

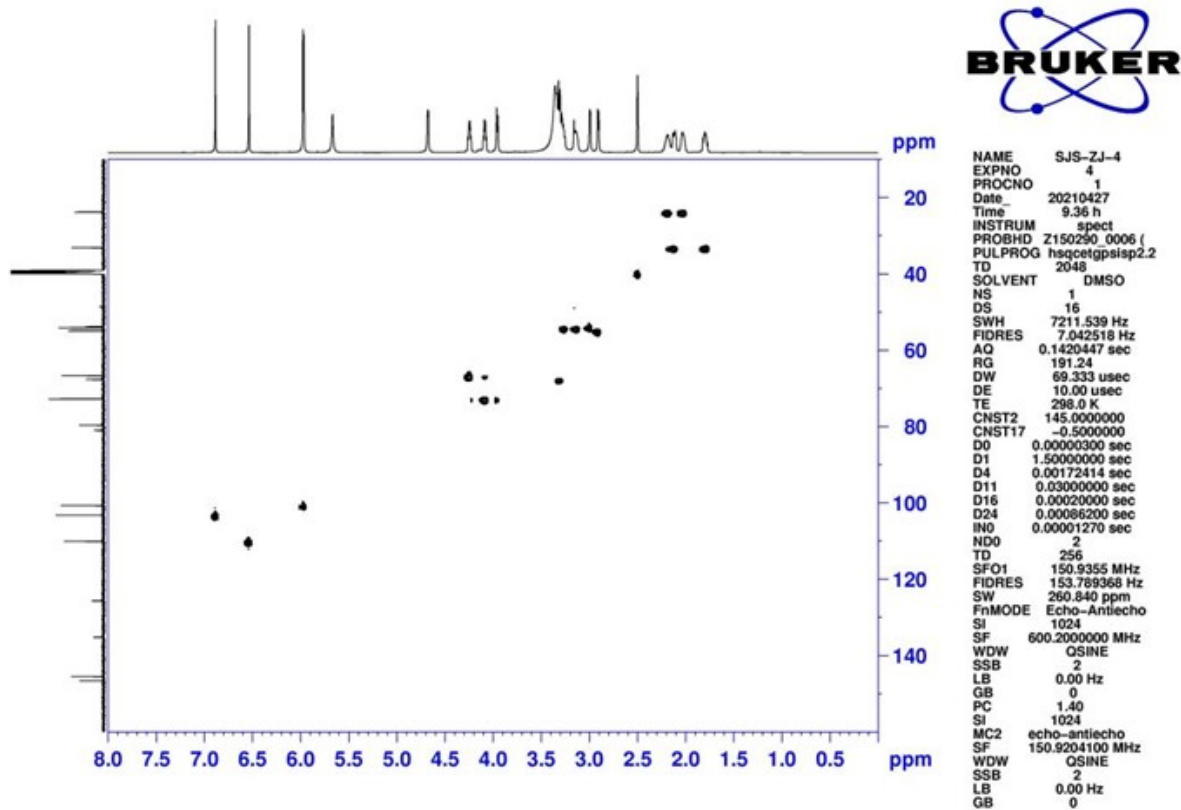

Figure S68. HSQC spectrum of compound **14a** (600 MHz,  $\text{DMSO-}d_6$ )

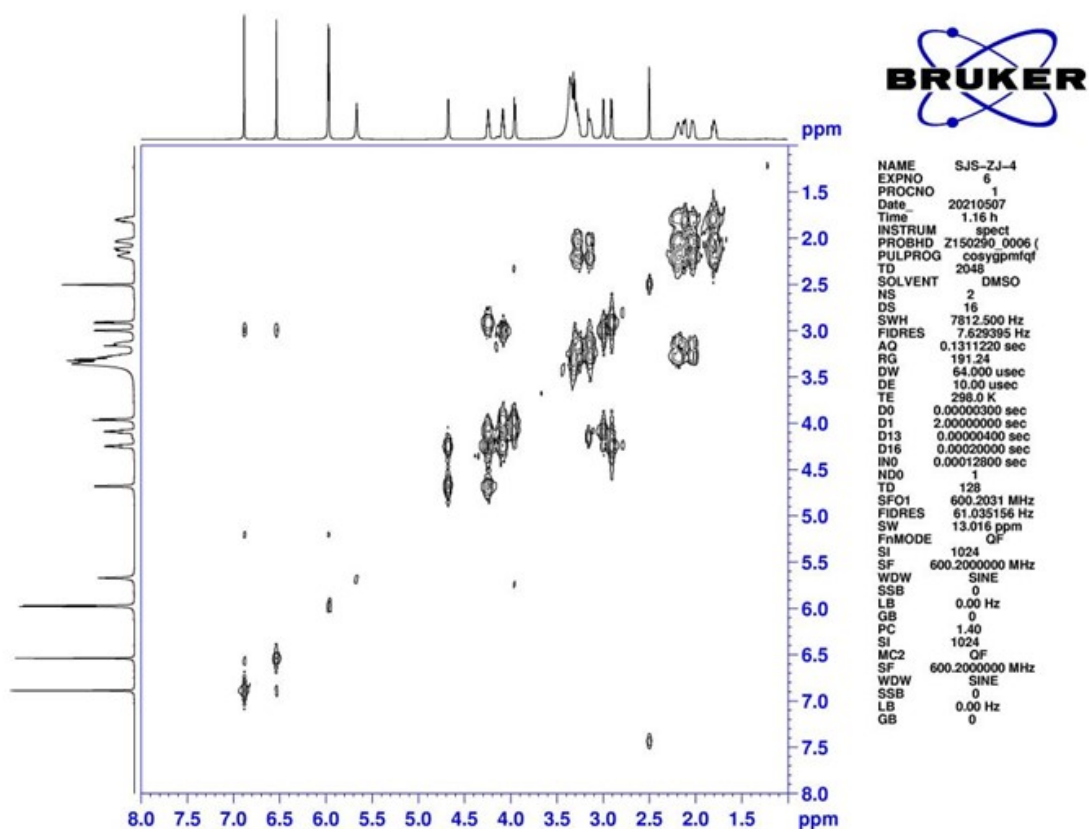

Figure S69.  $^1\text{H}$ - $^1\text{H}$  COSY spectrum of compound **14a** (600 MHz,  $\text{DMSO-}d_6$ )

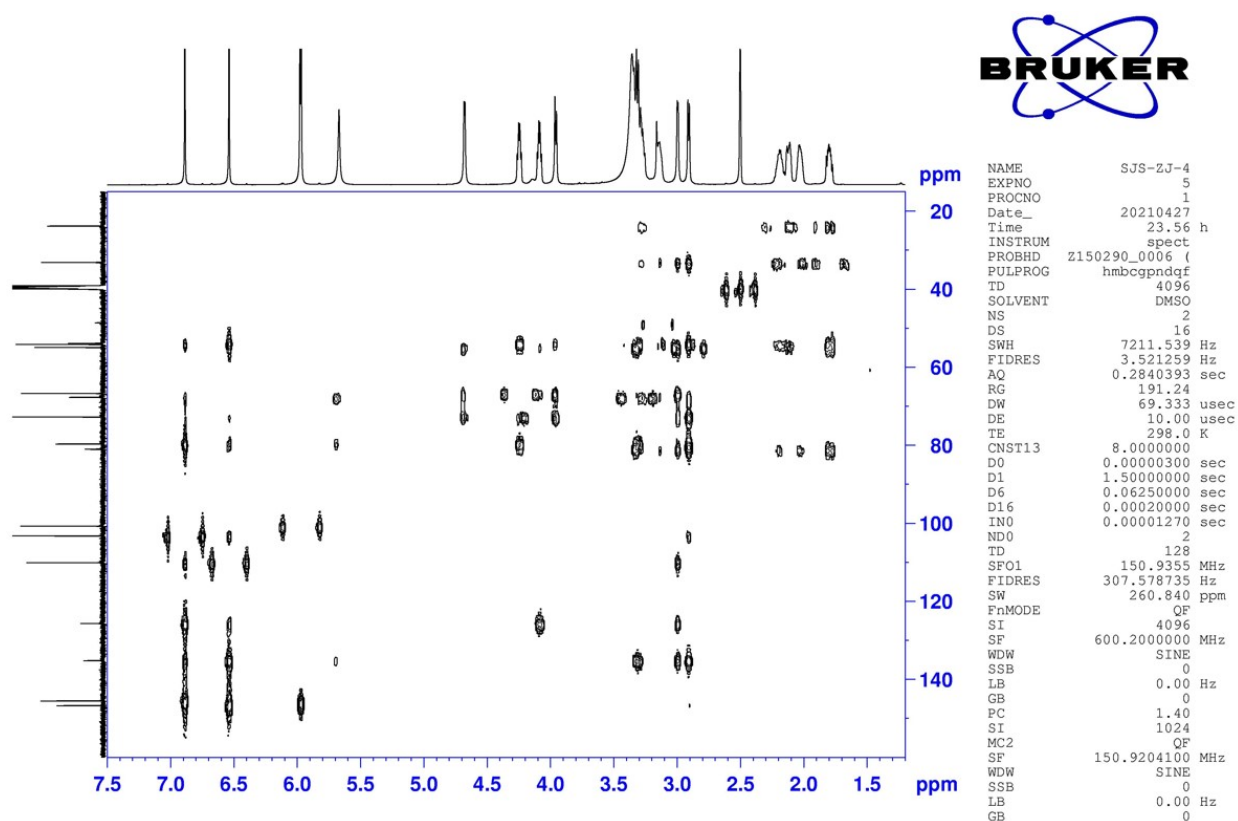

Figure S70. HMBC spectrum of compound **14a** (600 MHz,  $\text{DMSO-}d_6$ )

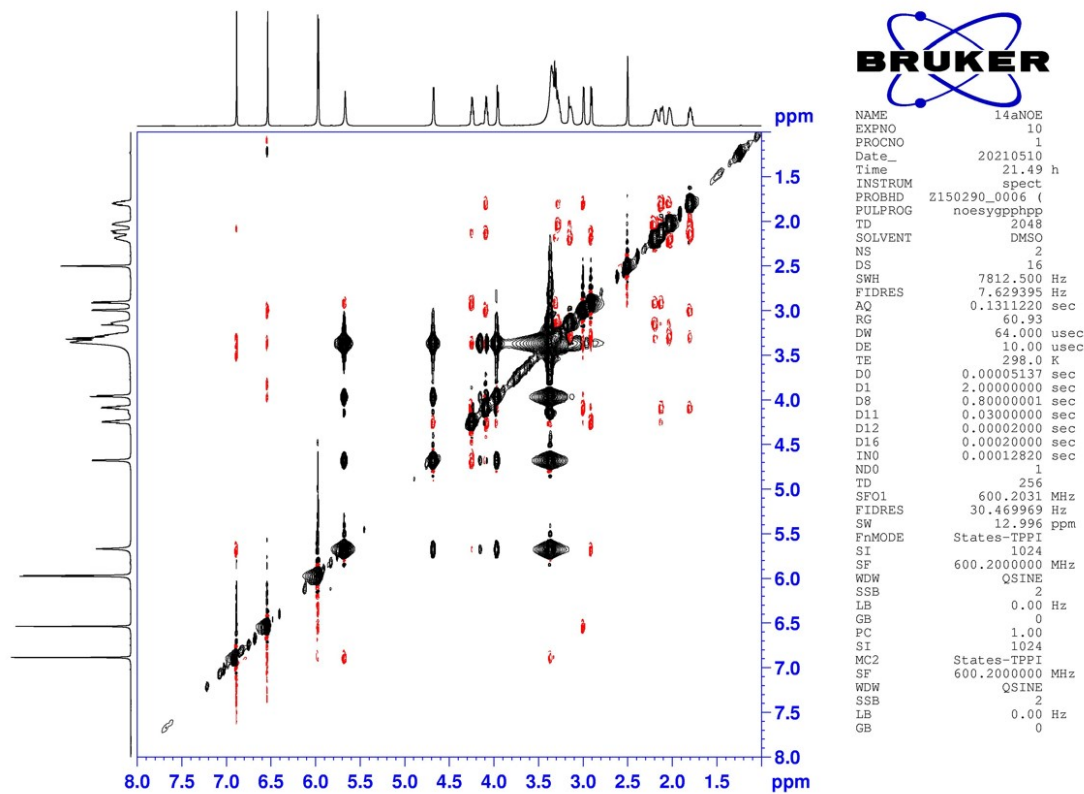

**Figure S71.** NOESY spectrum of compound **14a** (600 MHz, DMSO- $d_6$ )



14a

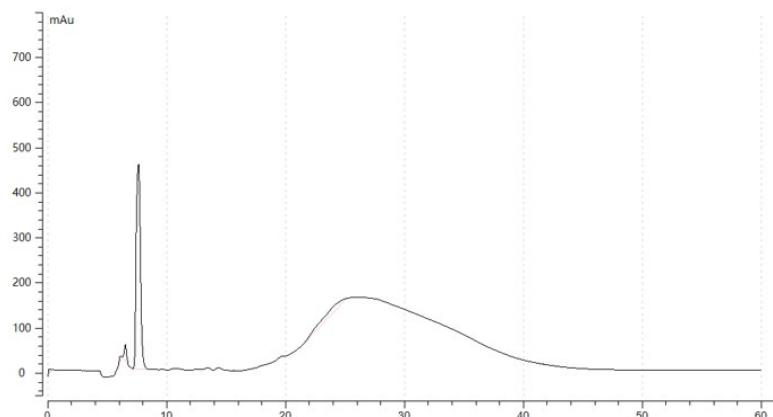

HPLC conditions:  
MeOH-H<sub>2</sub>O (32:68),  $t_R = 33.8$  min,  
low rate: 2.0 ml/min

14

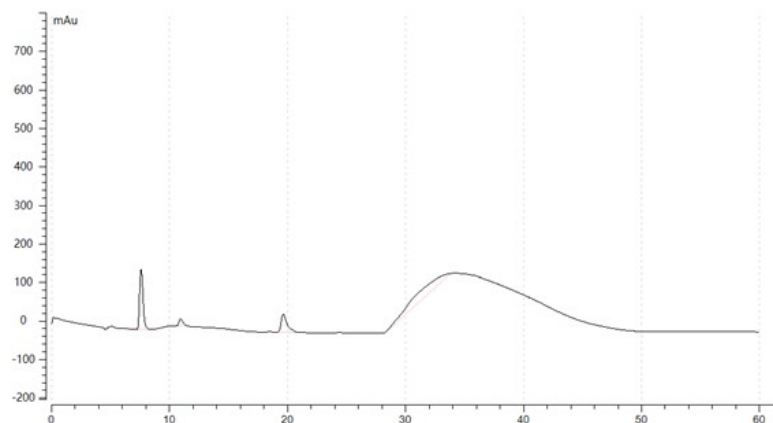

HPLC conditions:  
MeOH-H<sub>2</sub>O (32:68),  $t_R = 33.8$  min,  
low rate: 2.0 ml/min

14a

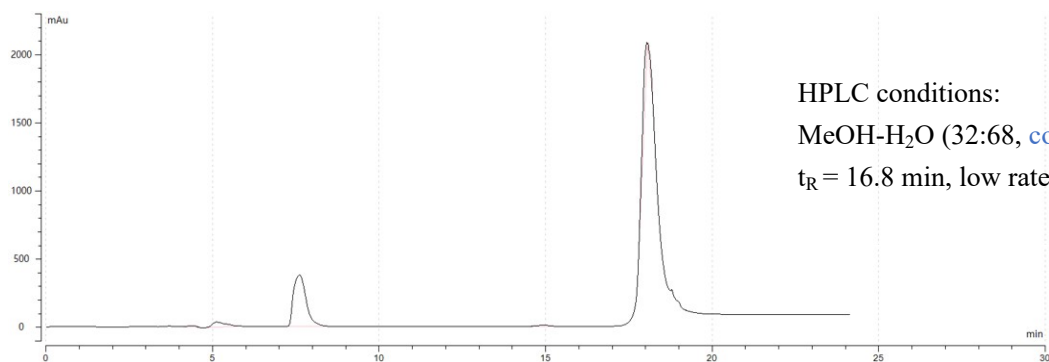

HPLC conditions:  
MeOH-H<sub>2</sub>O (32:68, containing 0.005% DEA),  
 $t_R = 16.8$  min, low rate: 2.0 ml/min

**14**

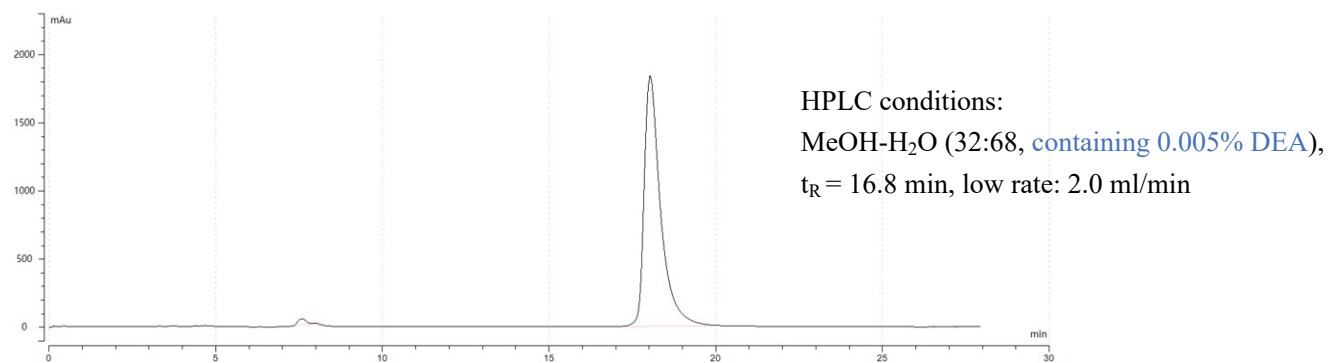

**Mixture of 14 and 14a**

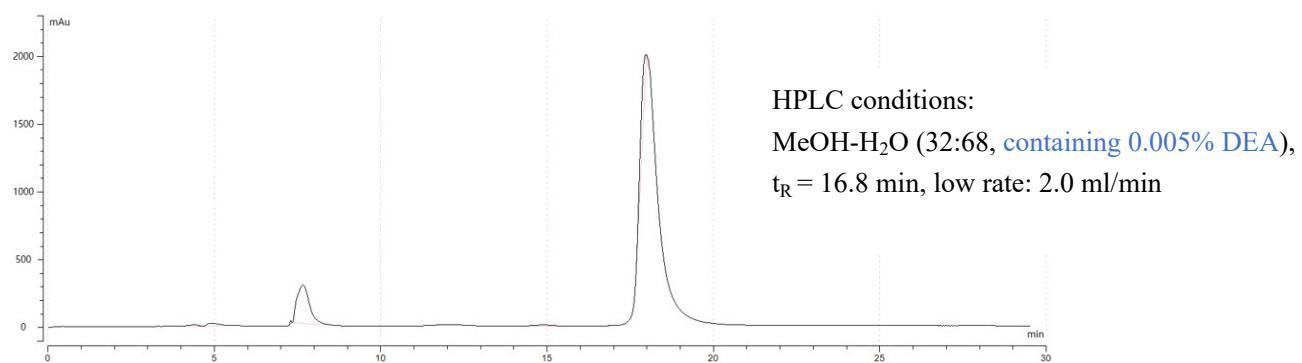

**Figure S72.** The HPLC chromatogram of **14a** and **14**

Single Mass Analysis

Tolerance = 10.0 PPM / DBE: min = -1.5, max = 50.0

Element prediction: Off

Number of isotope peaks used for i-FIT = 3

Monoisotopic Mass, Even Electron Ions

2918 formula(e) evaluated with 7 results within limits (up to 50 closest results for each mass)

Elements Used:

C: 0-100 H: 0-100 B: 0-1 N: 1-1 O: 0-100 S: 0-6 Cu: 0-5 Zn: 0-1 Se: 0-1 Br: 0-8 Ru: 0-1

1202-1-SZJ-D-14 43 (0.258) Cm (34:64)

1: TOF MS ES+

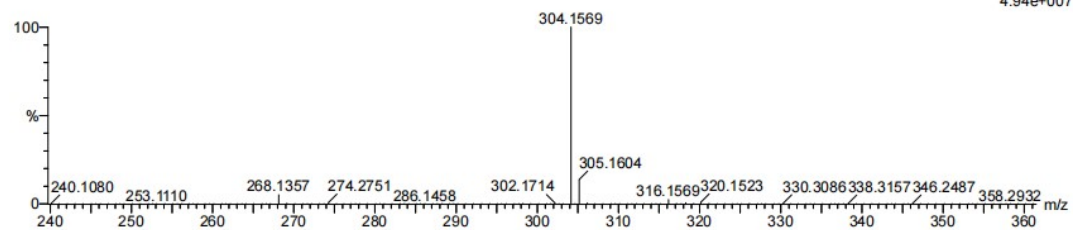

Minimum: -1.5  
Maximum: 50.0

| Mass     | Calc. Mass | mDa  | PPM  | DBE  | i-FIT | Norm   | Conf(%) | Formula           |
|----------|------------|------|------|------|-------|--------|---------|-------------------|
| 304.1569 | 304.1568   | 0.1  | 0.3  | 2.5  | 53.8  | 0.181  | 83.47   | C12 H23 B N O7    |
|          | 304.1576   | -0.7 | -2.3 | 1.5  | 63.8  | 10.154 | 0.00    | C13 H27 B N O2 S2 |
|          | 304.1578   | -0.9 | -3.0 | -1.5 | 111.7 | 58.087 | 0.00    | C13 H32 N Ru      |
|          | 304.1583   | -1.4 | -4.6 | 2.5  | 58.5  | 4.843  | 0.79    | C14 H26 N O4 S    |
|          | 304.1549   | 2.0  | 6.6  | 7.5  | 55.5  | 1.849  | 15.73   | C17 H22 N O4      |
|          | 304.1543   | 2.6  | 8.5  | 2.5  | 113.1 | 59.441 | 0.00    | C15 H30 N Se      |
|          | 304.1543   | 2.6  | 8.5  | 6.5  | 64.6  | 11.018 | 0.00    | C16 H23 B N O2 S  |

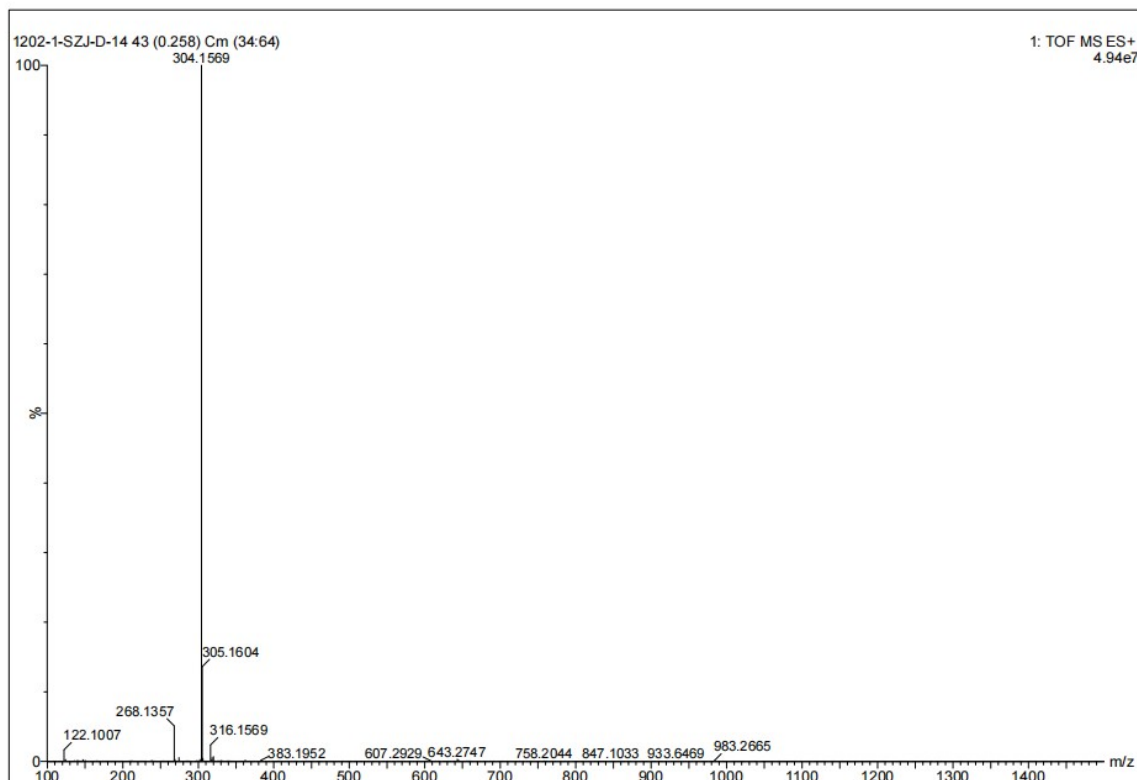

Figure S73. HRESIMS spectrum of 15

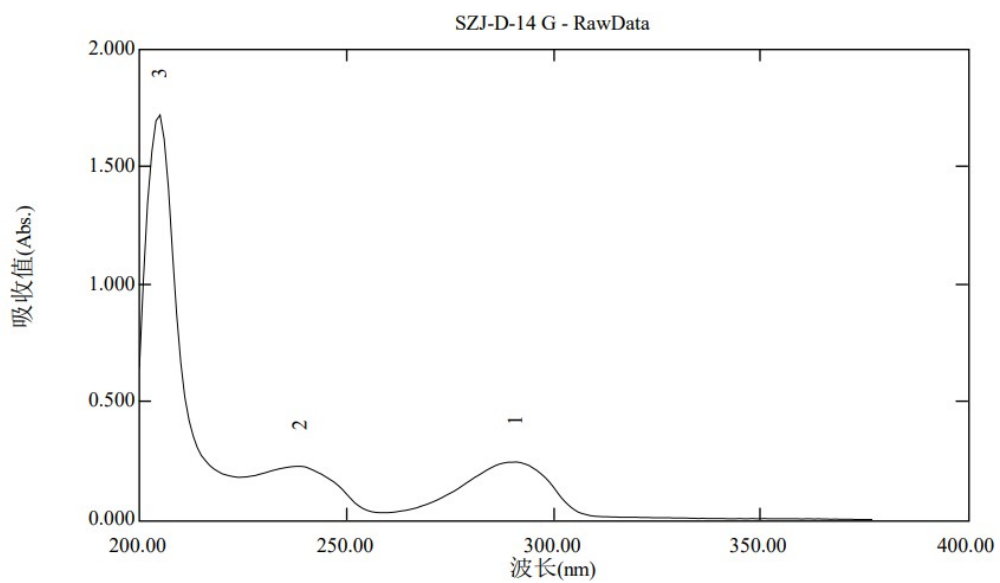

**Figure S74.** UV spectrum of **15**

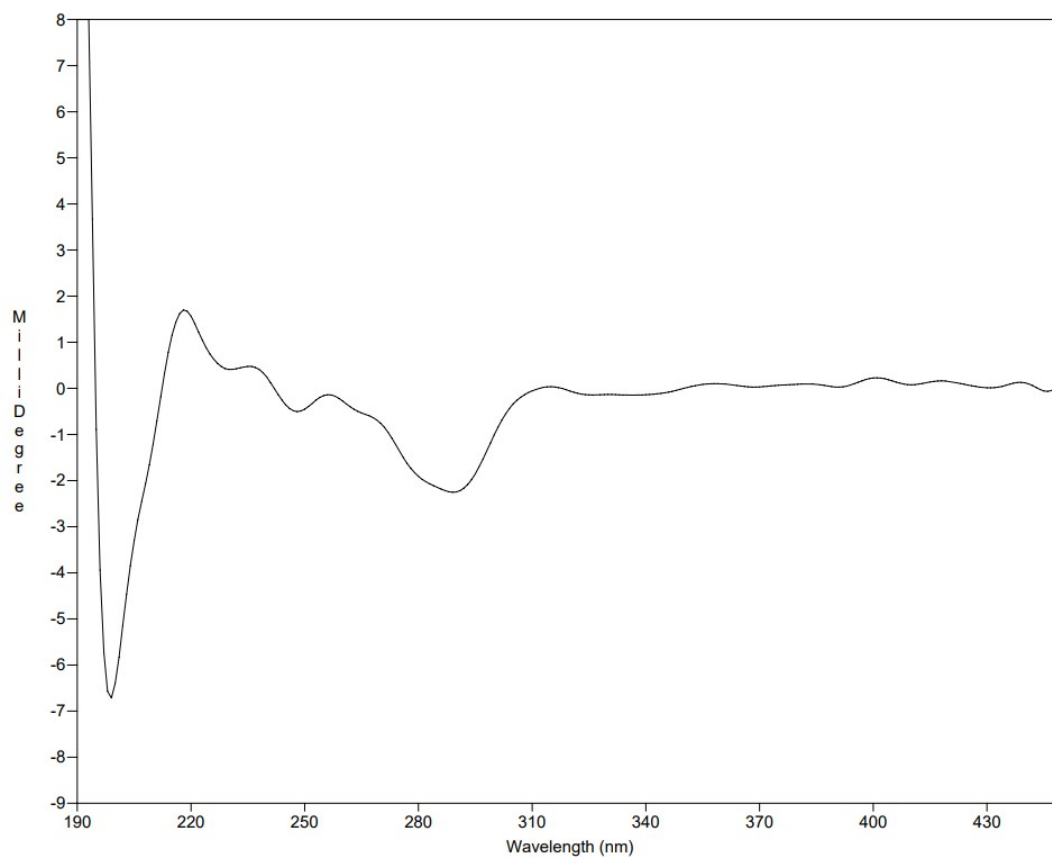

**Figure S75.** Experimental ECD spectrum of **15**

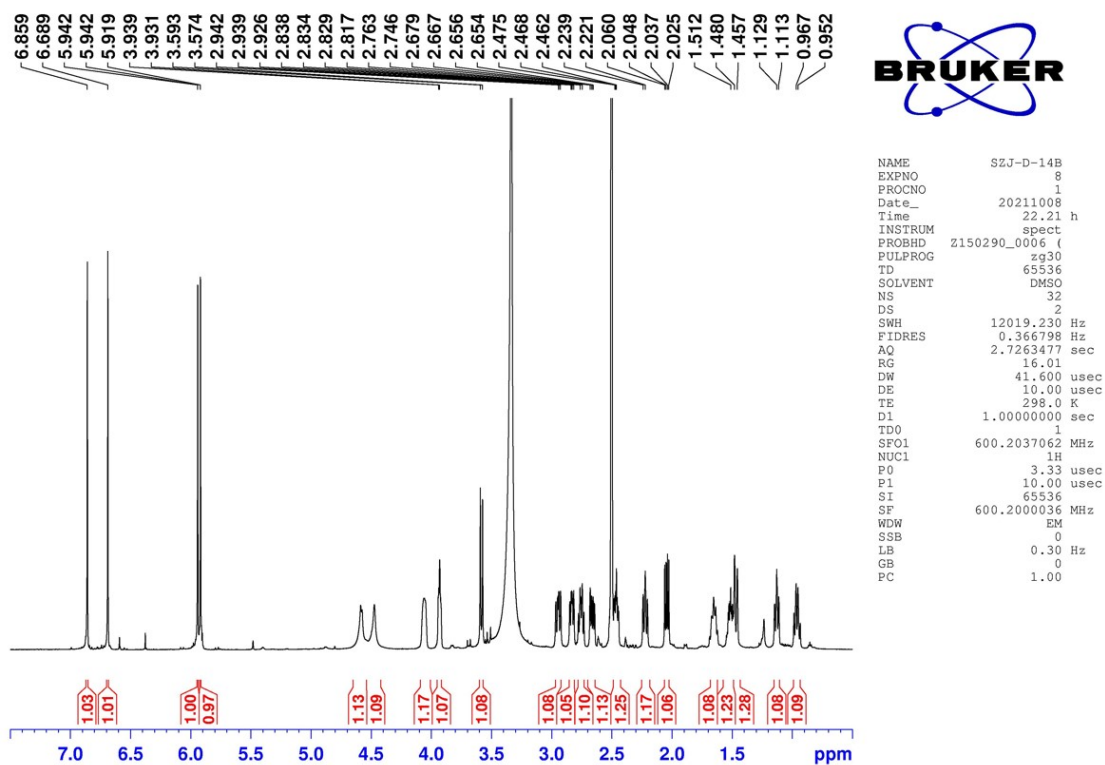

Figure S76.  $^1\text{H}$  NMR spectrum of compound **15** (600 MHz,  $\text{DMSO}-d_6$ )

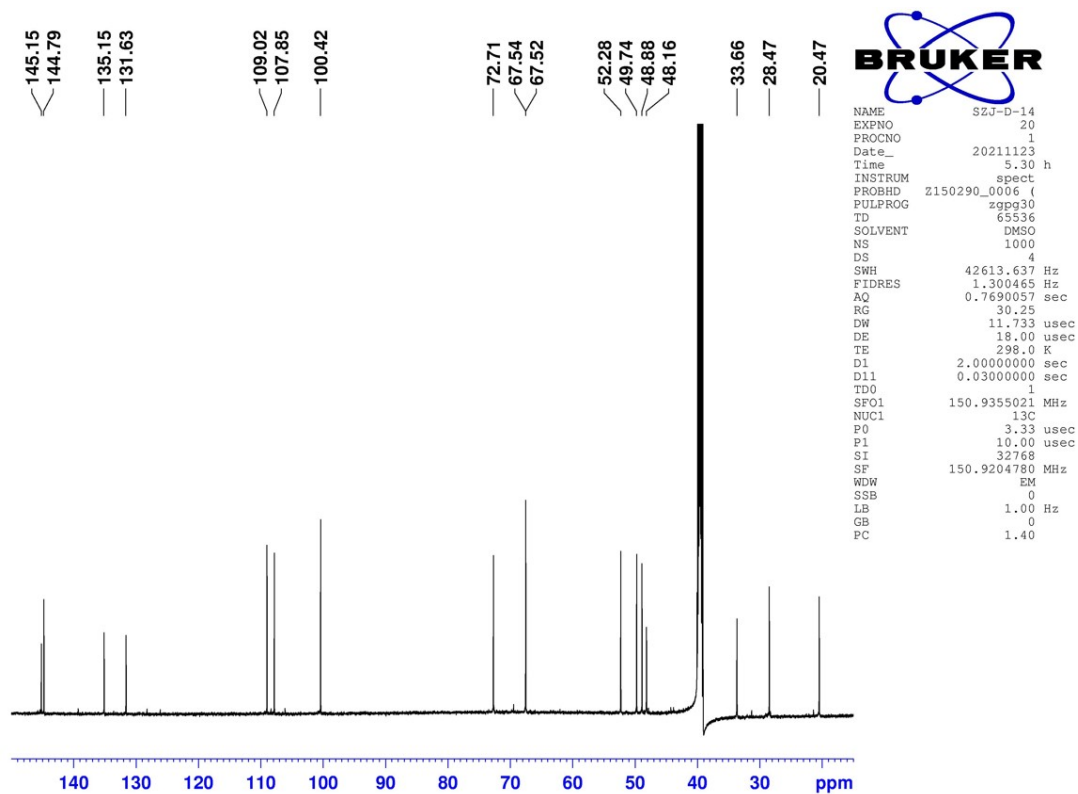

Figure S77.  $^{13}\text{C}$  NMR spectrum of compound **15** (150 MHz,  $\text{DMSO}-d_6$ )

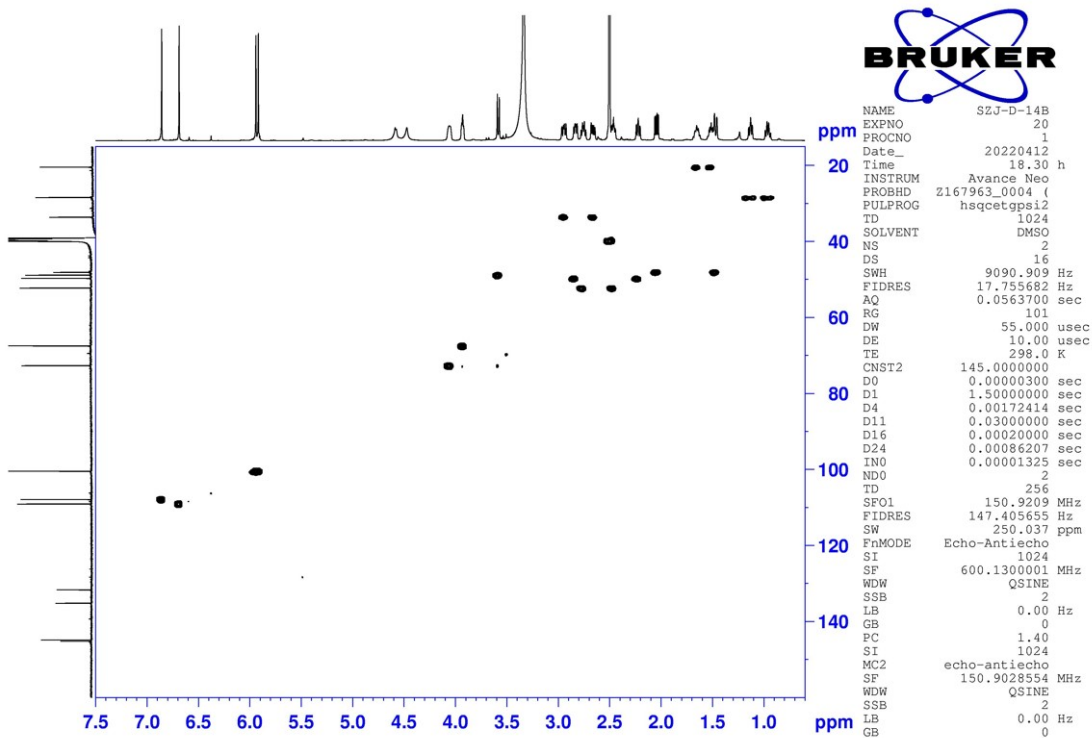

Figure S78. HSQC spectrum of compound **15** (600 MHz, DMSO- $d_6$ )

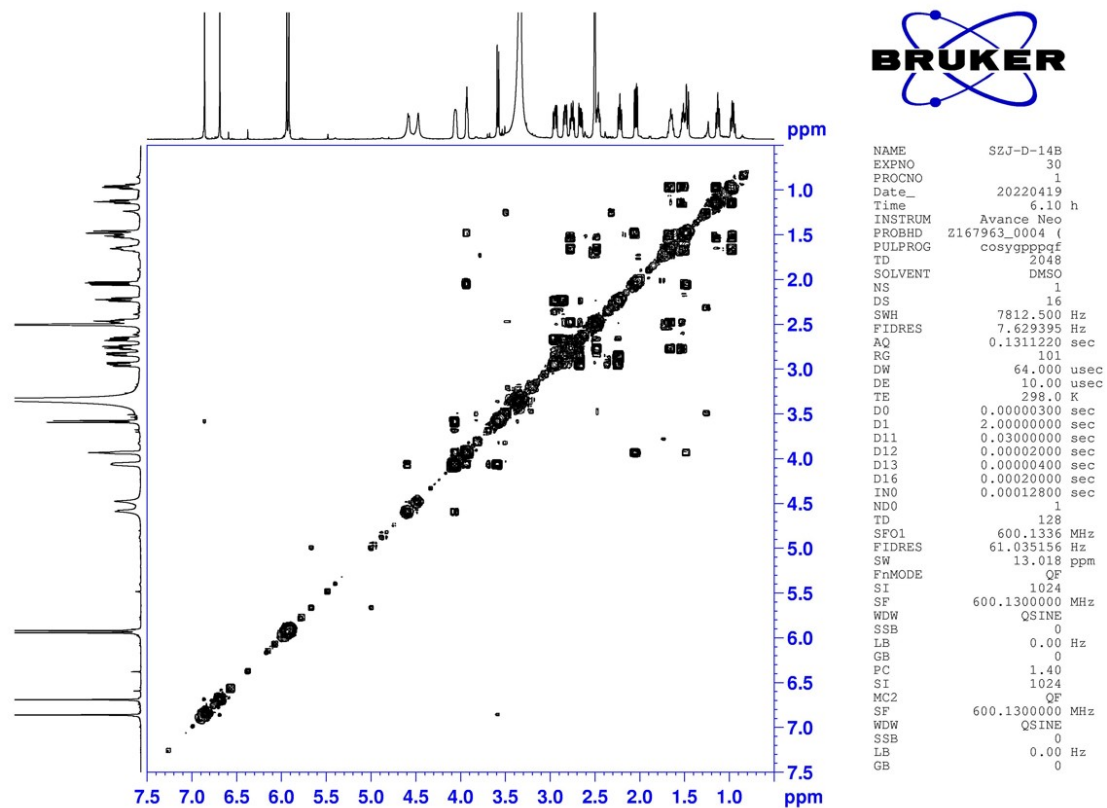

Figure S79.  $^1\text{H}$ - $^1\text{H}$  COSY spectrum of compound **15** (600 MHz, DMSO- $d_6$ )

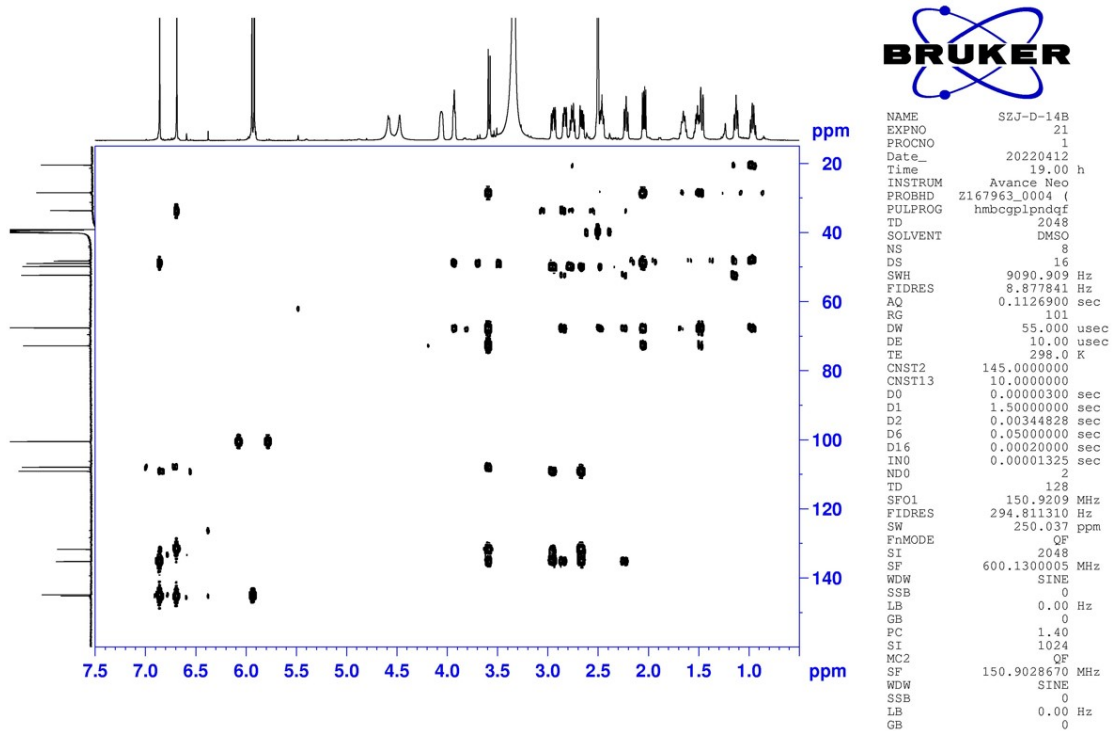

Figure S80. HMBC spectrum of compound 15 (600 MHz, DMSO- $d_6$ )

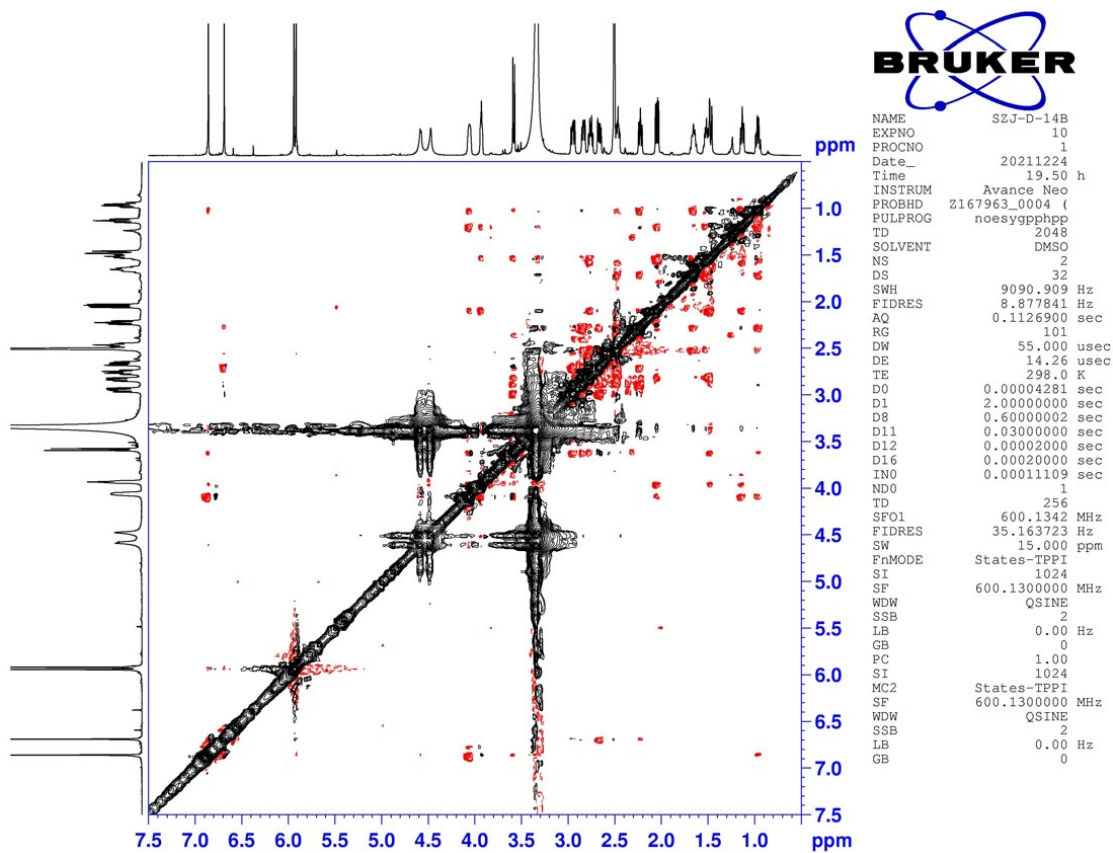

Figure S81. NOESY spectrum of compound 15 (600 MHz, DMSO- $d_6$ )

## Elemental Composition Report

Page 1

### Single Mass Analysis

Tolerance = 5.0 mDa / DBE: min = -1.5, max = 50.0

Element prediction: Off

Number of isotope peaks used for i-FIT = 3

Monoisotopic Mass, Even Electron Ions

217 formula(e) evaluated with 1 results within limits (up to 50 best isotopic matches for each mass)

Elements Used:

C: 23-23 H: 0-60 N: 0-7 O: 0-200

SZJ-D-5A 62 (0.366)

1: TOF MS ES+

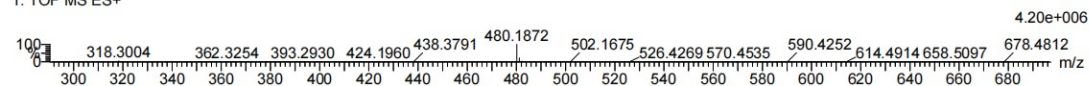

Minimum: -1.5  
Maximum: 50.0

| Mass     | Calc. Mass | mDa | PPM | DBE | i-FIT | Norm | Conf (%) | Formula       |
|----------|------------|-----|-----|-----|-------|------|----------|---------------|
| 480.1872 | 480.1870   | 0.2 | 0.4 | 9.5 | 808.0 | n/a  | n/a      | C23 H30 N 010 |

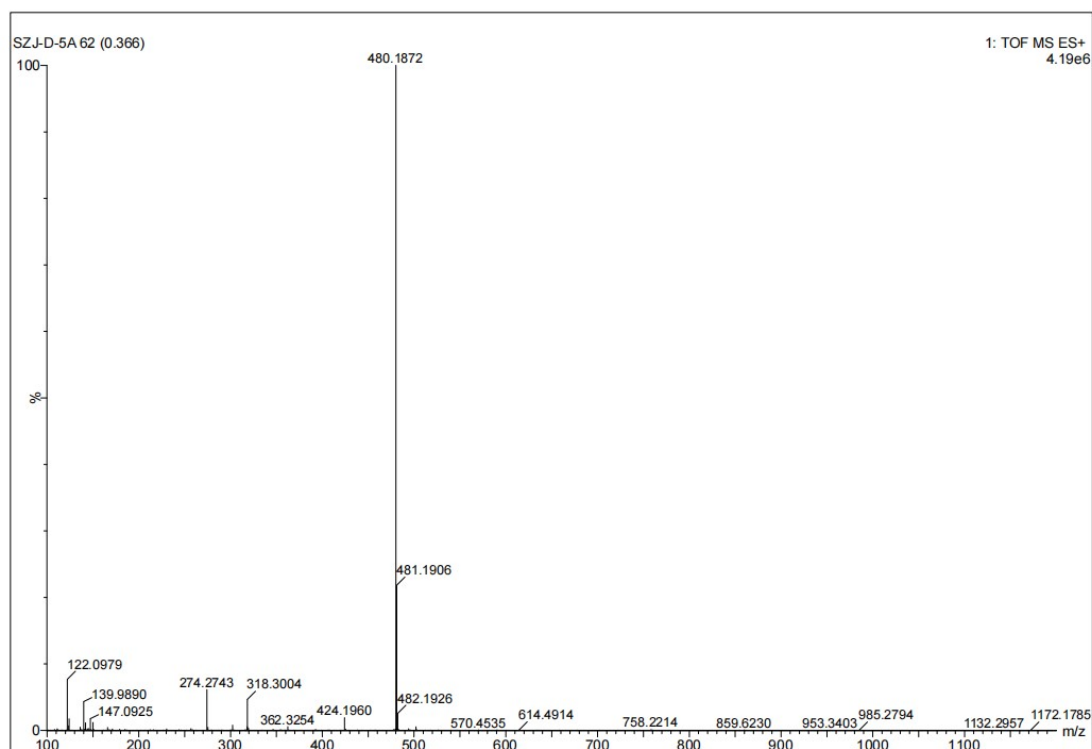

Figure S82. HRESIMS spectrum of 17



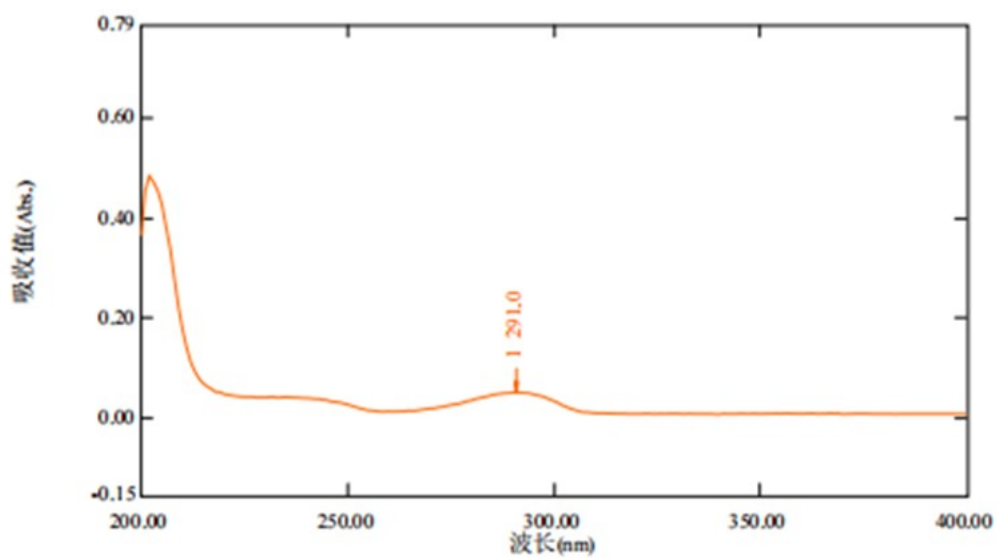

**Figure S83.** UV spectrum of compound **17**

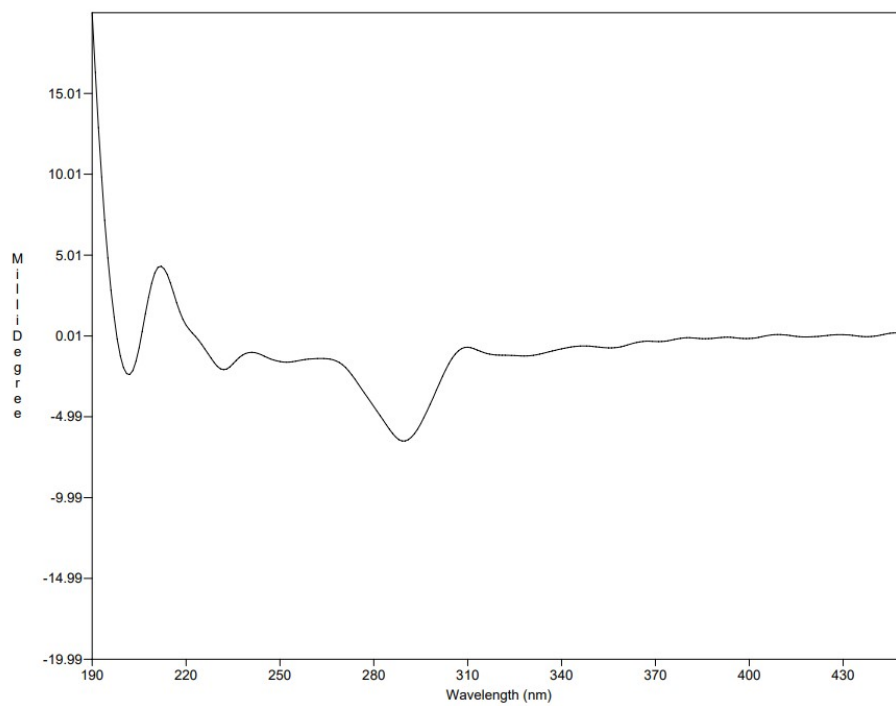

**Figure S84.** Experimental ECD spectrum of **17**

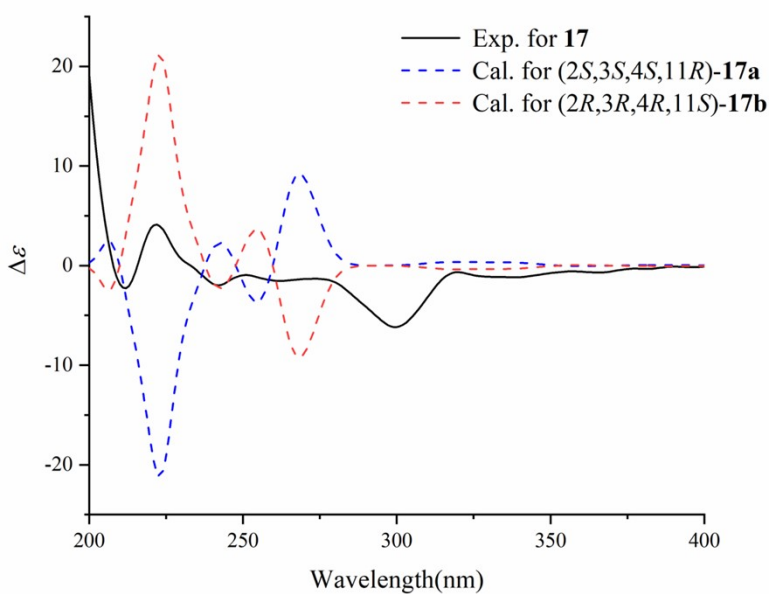

**Figure S85.** Experimental ECD spectrum of **17**, and B3LYP/6-31G(d,p)-calculated ECD spectra of the aglycone **17a** and **17b**

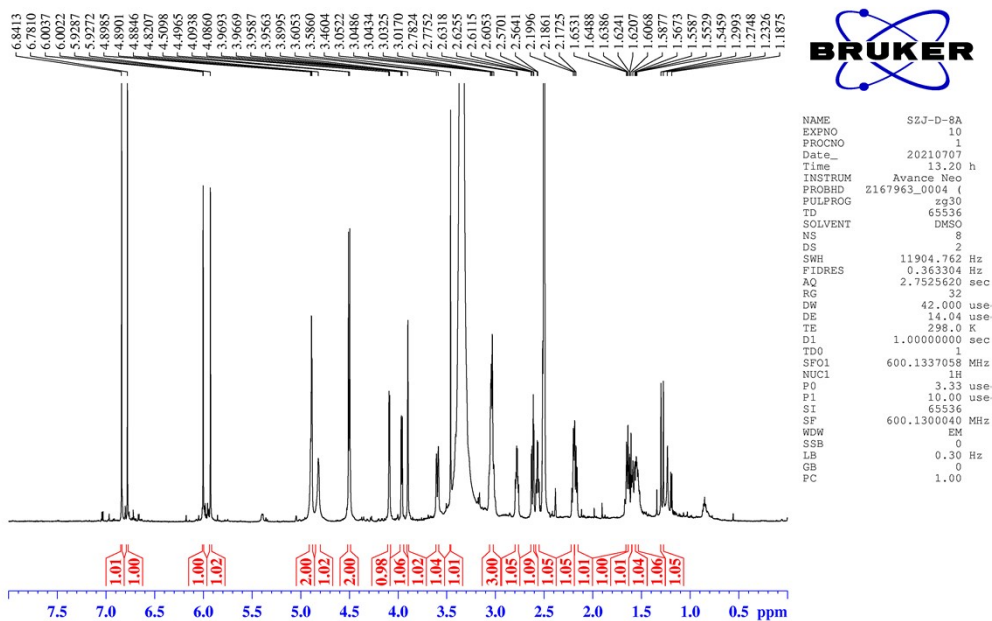

**Figure S86.**  $^1\text{H}$  NMR spectrum of compound **17** (600 MHz,  $\text{DMSO-}d_6$ )

<sup>13</sup>C NMR SZJ-D-8A in DMSO

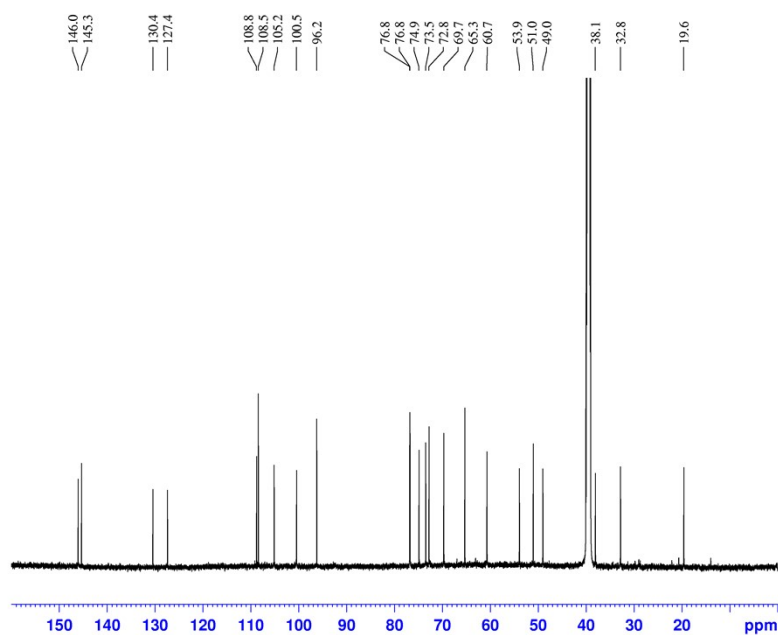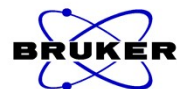

```

NAME          SZJ-D-8A
EXPNO         20
PROCNO        1
Date_         20210715
Time          3.56 h
INSTRUM       Avance Neo
PROBHD        z167963_0004 f
PULPROG       zgpg30
TD            65536
SOLVENT       DMSO
NS            2048
DS            4
SWH           37037.035 Hz
FIDRES        1.130281 Hz
AQ            0.8847860 se
RG            23.9167
DW            13.500 us
DE            18.00 us
TE            298.1 K
D1            2.0000000 se
D11           0.03000000 se
TD0           1
SFO1          150.9186533 MH
NUC1          13C
P0            3.33 us
P1            10.00 us
SI            32768
SP            150.9028760 MH
WDW           EM
SSB           0
LB            1.00 Hz
GB            0
PC            1.40
    
```

Figure S87. <sup>13</sup>C NMR spectrum of compound 17 (150 MHz, DMSO-*d*<sub>6</sub>)

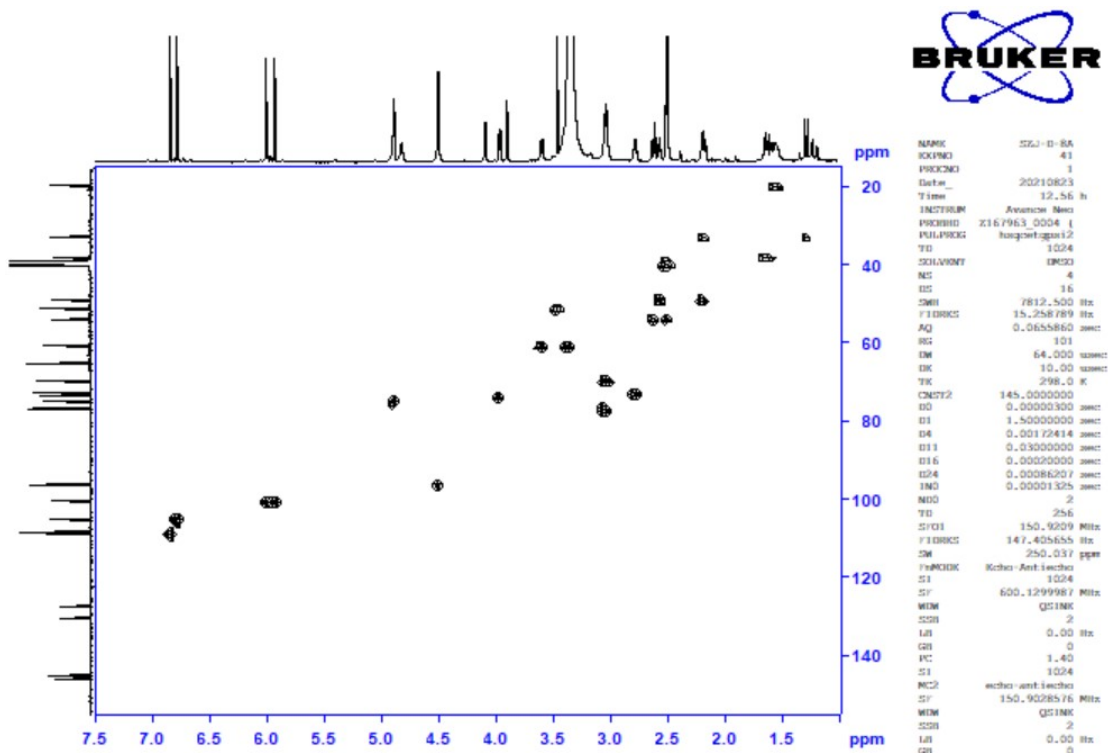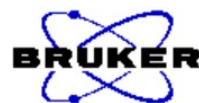

```

NAME          SZJ-D-8A
EXPNO         41
PROCNO        1
Date_         20210823
Time          12.56 h
INSTRUM       Avance Neo
PROBHD        z167963_0004 f
PULPROG       hsqcetfpgar12
TD            1024
SOLVENT       DMSO
NS            4
DS            16
SWH           7812.500 Hz
FIDRES        15.258789 Hz
AQ            0.0655860 sec
RG            101
DM            64.000 sec
DE            10.00 sec
TE            298.0 K
D1            145.000000 sec
D11           0.00000000 sec
D12           1.50000000 sec
D13           0.00122414 sec
D14           0.03000000 sec
D15           0.00000000 sec
D16           0.00000000 sec
D17           0.00086207 sec
D18           0.00001325 sec
TD0           2
SFO1          150.9028760 MHz
SFO2          600.1299998 MHz
P0            1024
P1            600.1299998 MHz
SI            65536
SP            150.9028760 MHz
WDW           G2SINK
SSB           2
LB            0.00 Hz
GB            0
PC            1.40
    
```

Figure S88. HSQC spectrum of compound 17 (600 MHz, DMSO-*d*<sub>6</sub>)

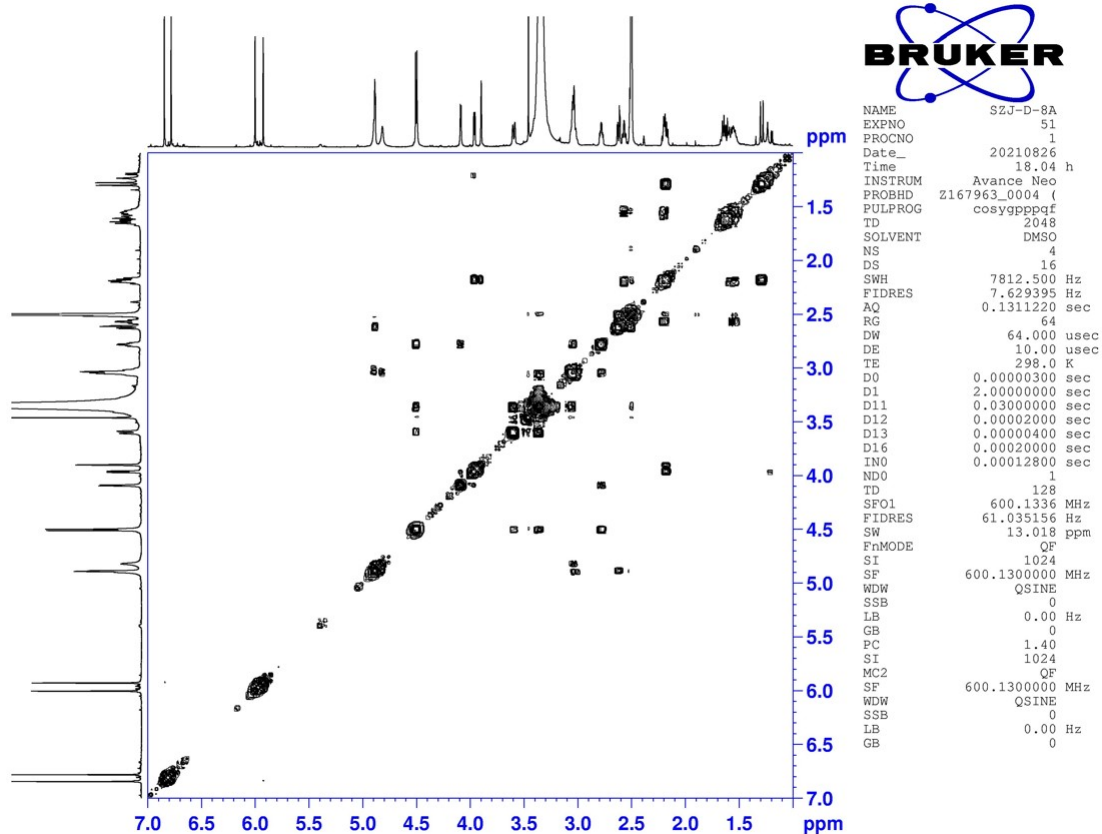

Figure S89.  $^1\text{H}$ - $^1\text{H}$  COSY spectrum of compound **17** (600 MHz,  $\text{DMSO-}d_6$ )

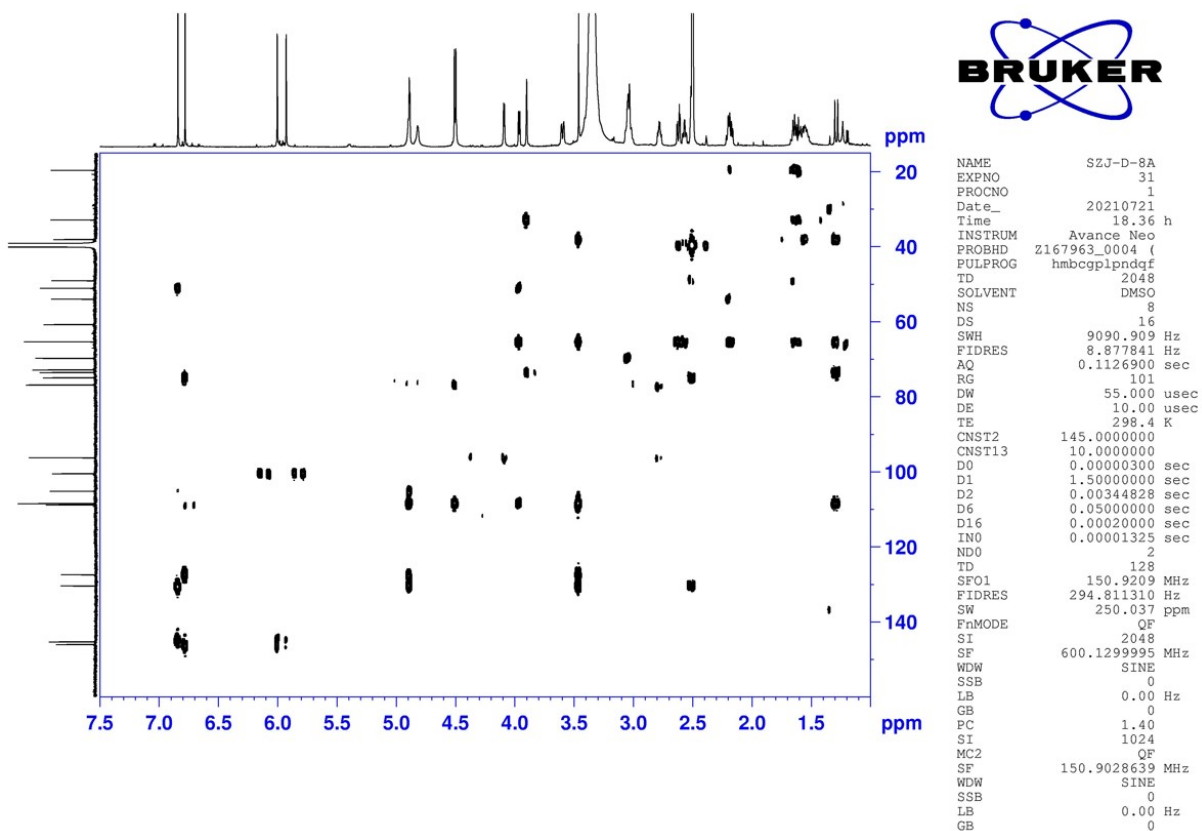

Figure S90. HMBC spectrum of compound **17** (600 MHz,  $\text{DMSO-}d_6$ )

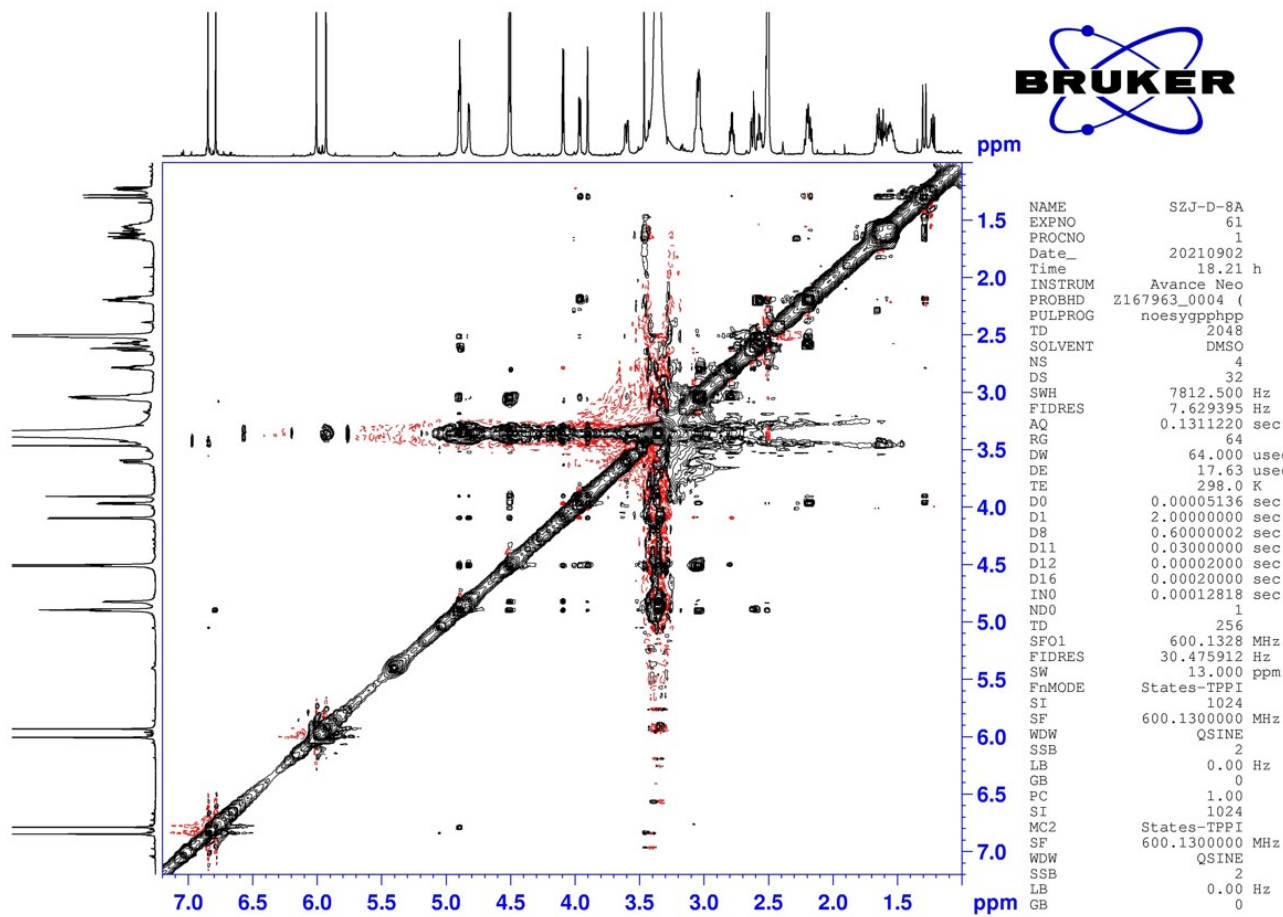

**Figure S91.** NOESY spectrum of compound **17** (600 MHz, DMSO- $d_6$ )

**Table S1.** X-ray crystallographic data for **1**

---

|                                   |                                                                                                                                          |
|-----------------------------------|------------------------------------------------------------------------------------------------------------------------------------------|
| Chemical formula                  | C <sub>20</sub> H <sub>27</sub> NO <sub>6</sub>                                                                                          |
| Formula weight                    | 377.42                                                                                                                                   |
| Temperature                       | 153(2) K                                                                                                                                 |
| Crystal system                    | orthorhombic                                                                                                                             |
| Space group                       | P 21 21 21                                                                                                                               |
| Unit cell dimensions              | a = 7.0303(2) Å    α = 90°<br>b = 9.8072(3) Å    β = 90°<br>c = 27.1272(8) Å    γ = 90°                                                  |
| Volume                            | 1870.35(10) Å <sup>3</sup>                                                                                                               |
| Z                                 | 4                                                                                                                                        |
| Density (calculated)              | 1.340 g/cm <sup>3</sup>                                                                                                                  |
| Absorption coefficient            | 0.815 mm <sup>-1</sup>                                                                                                                   |
| F (000)                           | 808                                                                                                                                      |
| Crystal size                      | 0.200 x 0.200 x 0.300 mm                                                                                                                 |
| Wavelength                        | 1.54178 Å                                                                                                                                |
| Radiation                         | Cu Kα, λ = 1.54178 Å                                                                                                                     |
| Theta range for data collection   | 4.79 to 72.58°                                                                                                                           |
| Index ranges                      | -8<=h<=8, -12<=k<=11, -31<=l<=33                                                                                                         |
| Reflections collected             | 13371                                                                                                                                    |
| Independent reflections           | 3655 [R(int) = 0.0162]                                                                                                                   |
| Data / restraints / parameters    | 3655 / 0 / 249                                                                                                                           |
| Goodness-of-fit on F <sup>2</sup> | 1.033                                                                                                                                    |
| Final R indices                   | 3621 data; I>2σ(I)    R <sub>1</sub> = 0.0257, wR <sub>2</sub> = 0.0679<br>all data    R <sub>1</sub> = 0.0261, wR <sub>2</sub> = 0.0681 |
| Weighting scheme                  | w=1/[σ <sup>2</sup> (Fo <sup>2</sup> ) + (0.0379P) <sup>2</sup> +0.4058P]<br>where P=(Fo <sup>2</sup> +2Fc<br>2)/3                       |
| Largest diff. peak and hole       | 0.261 and -0.176 eÅ <sup>-3</sup>                                                                                                        |
| R.M.S. deviation from mean        | 0.031 eÅ <sup>-3</sup>                                                                                                                   |
| Flack parameter                   | 0.07(2)                                                                                                                                  |

---

**Table S2.** X-ray crystallographic data for **6**

---

|                                   |                                                                                                                                                                       |
|-----------------------------------|-----------------------------------------------------------------------------------------------------------------------------------------------------------------------|
| Chemical formula                  | C <sub>20</sub> H <sub>31</sub> NO <sub>7</sub>                                                                                                                       |
| Formula weight                    | 397.46                                                                                                                                                                |
| Temperature                       | 153(2) K                                                                                                                                                              |
| Crystal system                    | monoclinic                                                                                                                                                            |
| Space group                       | P 1 21 1                                                                                                                                                              |
| Unit cell dimensions              | a = 9.2538(3) Å    α = 90°<br>b = 9.4315(3) Å    β = 95.7140(10)°<br>c = 11.3689(3) Å    γ = 90°                                                                      |
| Volume                            | 987.32(5) Å <sup>3</sup>                                                                                                                                              |
| Z                                 | 2                                                                                                                                                                     |
| Density (calculated)              | 1.337 g/cm <sup>3</sup>                                                                                                                                               |
| Absorption coefficient            | 0.834 mm <sup>-1</sup>                                                                                                                                                |
| F (000)                           | 428                                                                                                                                                                   |
| Crystal size                      | 0.080 x 0.100 x 0.100 mm                                                                                                                                              |
| Wavelength                        | 1.54178 Å                                                                                                                                                             |
| Radiation                         | Cu Kα, λ = 1.54178 Å                                                                                                                                                  |
| Theta range for data collection   | 3.91 to 72.54°                                                                                                                                                        |
| Index ranges                      | -11 ≤ h ≤ 11, -11 ≤ k ≤ 11, -14 ≤ l ≤ 13                                                                                                                              |
| Reflections collected             | 16388                                                                                                                                                                 |
| Independent reflections           | 3850 [R(int) = 0.0207]                                                                                                                                                |
| Data / restraints / parameters    | 3850 / 1 / 274                                                                                                                                                        |
| Goodness-of-fit on F <sup>2</sup> | 1.047                                                                                                                                                                 |
| Final R indices                   | 3797 data; I > 2σ(I)    R <sub>1</sub> = 0.0246, wR <sub>2</sub> = 0.0640<br>all data    R <sub>1</sub> = 0.0250, wR <sub>2</sub> = 0.0645                            |
| Weighting scheme                  | w = 1/[σ <sup>2</sup> (F <sub>o</sub> <sup>2</sup> ) + (0.0393P) <sup>2</sup> + 0.1317P]<br>where P = (F <sub>o</sub> <sup>2</sup> + 2F <sub>c</sub> <sup>2</sup> )/3 |
| Largest diff. peak and hole       | 0.163 and -0.155 eÅ <sup>-3</sup>                                                                                                                                     |
| R.M.S. deviation from mean        | 0.038 eÅ <sup>-3</sup>                                                                                                                                                |
| Flack parameter                   | 0.05(3)                                                                                                                                                               |

---

**Table S3.** X-ray crystallographic data for **13**

|                                   |                                                                                                                                            |
|-----------------------------------|--------------------------------------------------------------------------------------------------------------------------------------------|
| Chemical formula                  | C <sub>37</sub> H <sub>42</sub> Cl <sub>4</sub> N <sub>2</sub> O <sub>10</sub>                                                             |
| Formula weight                    | 816.52                                                                                                                                     |
| Temperature                       | 153(2) K                                                                                                                                   |
| Crystal system                    | monoclinic                                                                                                                                 |
| Space group                       | P 1 21 1                                                                                                                                   |
| Unit cell dimensions              | a = 7.8741(4) Å    α = 90°<br>b = 27.6610(14) Å    β = 100.292(3)°<br>c = 7.9804(4) Å    γ = 90°                                           |
| Volume                            | 1710.21(15) Å <sup>3</sup>                                                                                                                 |
| Z                                 | 2                                                                                                                                          |
| Density (calculated)              | 1.586 g/cm <sup>3</sup>                                                                                                                    |
| Absorption coefficient            | 3.707 mm <sup>-1</sup>                                                                                                                     |
| F (000)                           | 852                                                                                                                                        |
| Crystal size                      | 0.100 x 0.100 x 0.100 mm                                                                                                                   |
| Wavelength                        | 1.54178 Å                                                                                                                                  |
| Radiation                         | Cu Kα (λ = 1.54178 Å)                                                                                                                      |
| Theta range for data collection   | 3.19 to 81.22°                                                                                                                             |
| Index ranges                      | -10 ≤ h ≤ 9, -33 ≤ k ≤ 34, -10 ≤ l ≤ 10                                                                                                    |
| Reflections collected             | 18258                                                                                                                                      |
| Independent reflections           | 6536 [R(int) = 0.1756]                                                                                                                     |
| Data / restraints / parameters    | 6536 / 1 / 484                                                                                                                             |
| Goodness-of-fit on F <sup>2</sup> | 1.492                                                                                                                                      |
| Final R indices                   | 4246 data; I > 2σ(I)    R <sub>1</sub> = 0.1098, wR <sub>2</sub> = 0.2612<br>all data    R <sub>1</sub> = 0.1684, wR <sub>2</sub> = 0.3052 |
| Weighting scheme                  | w = 1/[σ <sup>2</sup> (Fo <sup>2</sup> ) + (0.1000P) <sup>2</sup> ]<br>where P = (Fo <sup>2</sup> + 2Fc <sup>2</sup> )/3                   |
| Largest diff. peak and hole       | 1.010 and -0.966 eÅ <sup>-3</sup>                                                                                                          |
| R.M.S. deviation from mean        | 0.175 eÅ <sup>-3</sup>                                                                                                                     |
| Flack parameter                   | 0.21(2)                                                                                                                                    |



**Table S4.**  $^1\text{H}$  NMR and  $^{13}\text{C}$  NMR data of compounds **14a** and **14** (600 MHz, DMSO- $d_6$ )

| Position | <b>14a</b>                         |                            | <b>14</b>                          |                            |
|----------|------------------------------------|----------------------------|------------------------------------|----------------------------|
|          | $\delta_{\text{H}}$ , ( $J$ in Hz) | $\delta_{\text{C}}$ , type | $\delta_{\text{H}}$ , ( $J$ in Hz) | $\delta_{\text{C}}$ , type |
| 1        | 2.90, d (7.0)                      | 54.9, CH                   | 2.47, m                            | 56.6, CH                   |
| 2        | 4.25, m                            | 66.7, CH                   | 4.16, t (7.3)                      | 68.0, CH                   |
| 3        | 4.08, m                            | 72.7, CH                   | 3.98, m                            | 72.7, CH                   |
| 4        | 2.99, d (4.1)                      | 53.9, CH                   | 2.48, m                            | 57.5, CH                   |
| 5        |                                    | 79.6, C                    |                                    | 75.9, C                    |
| 6        | 1.80, m                            | 33.1, CH <sub>2</sub>      | 1.63, m                            | 34.9, CH <sub>2</sub>      |
|          | 2.12, m                            |                            | 1.74, m                            |                            |
| 7        | 2.03, m                            | 23.8, CH <sub>2</sub>      | 1.74, m                            | 26.1, CH <sub>2</sub>      |
|          | 2.19, m                            |                            | 1.87, m                            |                            |
| 8        | 3.13, m                            | 54.1, CH <sub>2</sub>      | 2.40, m                            | 54.4, CH <sub>2</sub>      |
|          | 3.27, m                            |                            | 2.81, m                            |                            |
| 10       | 3.30 (2H, m)                       | 67.7, CH <sub>2</sub>      | 2.69, d (7.3)                      | 71.0, CH <sub>2</sub>      |
|          |                                    |                            | 2.75, d (7.3)                      |                            |
| 11       |                                    | 81.0, C                    |                                    | 82.3, C                    |
| 12       |                                    | 135.2, C                   |                                    | 138.7, C                   |
| 13       |                                    | 125.7, C                   |                                    | 128.9, C                   |
| 14       | 6.54, s                            | 110.1, CH                  | 6.42, s                            | 109.4, CH                  |
| 15       |                                    | 145.6, C                   |                                    | 144.5, C                   |
| 16       |                                    | 146.6, C                   |                                    | 145.2, C                   |
| 17       | 6.88, s                            | 103.2, CH                  | 6.85, s                            | 102.9, CH                  |
| 18       | 5.97, s                            | 100.7, CH <sub>2</sub>     | 5.90, s                            | 100.1, CH <sub>2</sub>     |
|          | 5.96, s                            |                            | 5.87, s                            |                            |
| 2-OH     | 4.67, d (4.4)                      |                            | 4.05, br s                         |                            |
| 3-OH     | 3.96, d (7.4)                      |                            | 3.54, d (6.5)                      |                            |
| 11-OH    | 5.66, br s                         |                            | 4.58, br s                         |                            |

**Table S5.**  $^1\text{H}$  NMR and  $^{13}\text{C}$  NMR data of compounds **14a** and **14** (310 K  $\text{CDCl}_3/\text{CD}_3\text{OD}$  4:1)

| Position | <b>14a</b>                              |                            | <b>14</b>                               |                            |
|----------|-----------------------------------------|----------------------------|-----------------------------------------|----------------------------|
|          | $\delta_{\text{H}}$ , ( <i>J</i> in Hz) | $\delta_{\text{C}}$ , type | $\delta_{\text{H}}$ , ( <i>J</i> in Hz) | $\delta_{\text{C}}$ , type |
| 1        | 2.82, d (7.0)                           | 55.8, CH                   | 2.65, d (7.0)                           | 56.6, CH                   |
| 2        | 4.24, t (7.5)                           | 67.8, CH                   | 4.29, t (7.5)                           | 68.7 CH                    |
| 3        | 4.06, dd (7.5, 5.1)                     | 73.4, CH                   | 4.20, dd (7.5, 5.2)                     | 73.5, CH                   |
| 4        | 3.04, d (4.2)                           | 54.5, CH                   | 2.70, d, (5.2)                          | 57.2, CH                   |
| 5        |                                         | 80.7, C                    |                                         | 76.3, C                    |
| 6        | 1.85, m                                 | 33.9, $\text{CH}_2$        | 1.72, m                                 | 35.2, $\text{CH}_2$        |
|          | 2.10, m                                 |                            | 1.88, m                                 |                            |
| 7        | 1.93, m                                 | 24.7, $\text{CH}_2$        | 1.80, m                                 | 26.1, $\text{CH}_2$        |
|          | 2.10, m                                 |                            | 1.98, m                                 |                            |
| 8        | 2.93, m                                 | 54.9, $\text{CH}_2$        | 2.54, m                                 | 55.1, $\text{CH}_2$        |
|          | 3.38, m                                 |                            | 3.00, m                                 |                            |
| 10       | 3.38, d (10.0)                          | 68.3, $\text{CH}_2$        | 2.85, d (8.0)                           | 70.1, $\text{CH}_2$        |
|          | 3.08, d (10.0)                          |                            | 3.07, d (8.0)                           |                            |
| 11       |                                         | 81.4, C                    |                                         | 82.7, C                    |
| 12       |                                         | 134.3, C                   |                                         | 137.5, C                   |
| 13       |                                         | 124.8, C                   |                                         | 127.1, C                   |
| 14       | 6.48, s                                 | 110.4, CH                  | 6.53, s                                 | 109.8, CH                  |
| 15       |                                         | 147.2, C                   |                                         | 146.1, C                   |
| 16       |                                         | 148.3, C                   |                                         | 146.8, C                   |
| 17       | 6.87, s                                 | 103.5, CH                  | 7.01, s                                 | 103.3, CH                  |
| 18       | 5.81, s                                 | 100.7, $\text{CH}_2$       | 5.90, s                                 | 100.7, $\text{CH}_2$       |
|          | 5.80, s                                 |                            | 5.87, s                                 |                            |

**Table S6.** Original data on antiproliferative effects on THP-1 and K562 cells of **1-32**

|           | K562  |       |       | MEAN  | SD   | THP-1 |       |       | MEAN  | SD   |
|-----------|-------|-------|-------|-------|------|-------|-------|-------|-------|------|
| <b>1</b>  | 22.50 | 21.07 | 23.31 | 22.29 | 1.13 | 19.80 | 17.56 | 22.20 | 21.34 | 4.74 |
| <b>2</b>  | 21.20 | 21.91 | 25.27 | 22.79 | 2.17 | 21.4  | 16.95 | 26.58 | 24.71 | 2.87 |
| <b>3</b>  | 18.20 | 25.21 | 21.72 | 21.71 | 4.96 | 18.43 | 14.68 | 20.5  | 17.86 | 2.95 |
| <b>4</b>  | 20.42 | 19.78 | 20.62 | 20.22 | 2.51 | 22.21 | 23.64 | 21.18 | 22.52 | 1.78 |
| <b>5</b>  | 26.13 | 29.32 | 24.35 | 26.59 | 2.52 | 16.61 | 17.03 | 26.92 | 17.83 | 1.78 |
| <b>6</b>  | 21.50 | 20.16 | 27.57 | 23.08 | 3.95 | 20.83 | 15.79 | 16.98 | 17.86 | 2.62 |
| <b>7</b>  | >40   | >40   | >40   |       |      | >40   | >40   | >40   |       |      |
| <b>8</b>  | 22.8  | 27.69 | 21.31 | 23.93 | 3.34 | 18.02 | 14.86 | 13.58 | 15.48 | 2.27 |
| <b>9</b>  | 16.3  | 18.42 | 19.92 | 18.21 | 1.82 | 19.13 | 16.85 | 21.65 | 19.20 | 2.40 |
| <b>10</b> | 27.0  | 24.9  | 25.67 | 25.86 | 1.06 | 16.65 | 16.31 | 16.38 | 16.43 | 0.15 |
| <b>11</b> | 26.02 | 28.06 | 26.74 | 26.94 | 1.03 | 14.8  | 18.7  | 16.23 | 16.24 | 2.18 |
| <b>12</b> | 26.61 | 29.69 | 22.77 | 26.36 | 3.47 | 16.58 | 17.26 | 15.88 | 16.23 | 1.49 |
| <b>13</b> | 24.0  | 19.19 | 24.16 | 22.45 | 2.82 | 17.05 | 14.07 | 22.70 | 17.92 | 4.39 |
| <b>14</b> | 17.8  | 23.79 | 25.91 | 20.83 | 3.00 | 11.63 | 14.71 | 17.81 | 14.71 | 3.11 |
| <b>15</b> | >40   | >40   | >40   |       |      | 16.50 | 17.52 | 16.42 | 16.88 | 2.50 |
| <b>16</b> | 27.56 | 28.28 | 28.87 | 28.24 | 0.66 | 16.02 | 15.59 | 15.82 | 15.51 | 2.01 |
| <b>17</b> | 20.3  | 26.48 | 30.02 | 25.60 | 4.92 | 18.02 | 18.42 | 17.42 | 17.48 | 1.26 |
| <b>18</b> | 20.35 | 25.18 | 22.65 | 22.73 | 2.42 | 12.88 | 13.02 | 13.32 | 12.97 | 2.67 |
| <b>19</b> | 31.05 | 28.28 | 23.77 | 27.70 | 3.67 | 17.56 | 18.02 | 16.59 | 17.25 | 1.33 |
| <b>20</b> | 26.2  | 21.62 | 20.64 | 22.82 | 2.97 | 21.75 | 19.7  | 21.66 | 21.02 | 1.14 |
| <b>21</b> | 30.2  | 26.57 | 31.87 | 29.55 | 2.71 | 22.93 | 13.93 | 20.85 | 19.23 | 4.70 |
| <b>22</b> | 21.8  | 24.32 | 20.41 | 22.18 | 1.98 | 21.23 | 16.85 | 26.41 | 24.49 | 2.86 |
| <b>23</b> | >40   | >40   | >40   |       |      | >40   | >40   | >40   |       |      |
| <b>24</b> | 19.6  | 19.45 | 21.19 | 20.08 | 0.96 | 14.95 | 12.01 | 27.57 | 16.22 | 5.01 |
| <b>25</b> | 29.11 | 26.9  | 20.38 | 25.46 | 4.54 | 15.59 | 16.02 | 14.88 | 15.27 | 1.47 |
| <b>26</b> | 9.02  | 8.82  | 7.92  | 8.23  | 2.78 | 10.02 | 9.45  | 9.62  | 9.93  | 2.44 |
| <b>27</b> | 23.16 | 33.43 | 28.81 | 28.47 | 5.14 | 14.85 | 22.7  | 16.23 | 17.09 | 3.66 |
| <b>28</b> | 22.03 | 23.77 | 26.98 | 24.26 | 2.51 | 18.52 | 17.59 | 16.80 | 17.22 | 1.49 |
| <b>29</b> | 20.54 | 29.24 | 26.54 | 25.44 | 4.45 | 16.89 | 19.02 | 16.04 | 16.66 | 2.18 |
| <b>30</b> | 5.11  | 3.46  | 4.37  | 4.31  | 0.83 | 2.38  | 3.36  | 3.33  | 3.02  | 0.56 |
| <b>31</b> | 0.36  | 0.23  | 0.27  | 0.29  | 0.07 | 0.21  | 0.18  | 0.32  | 0.24  | 0.07 |
| <b>32</b> | 21.0  | 20.42 | 16.9  | 19.44 | 2.22 | 12.97 | 12.47 | 10.85 | 11.91 | 2.05 |

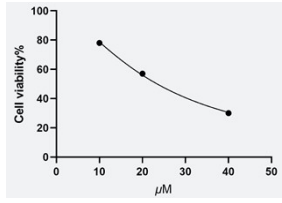

**1**

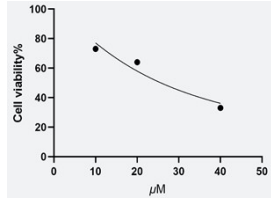

**2**

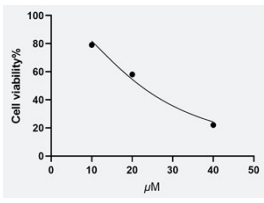

**3**

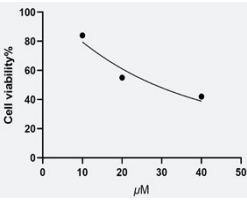

**4**

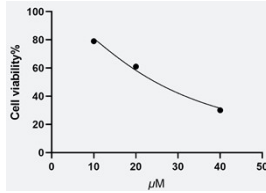

**5**

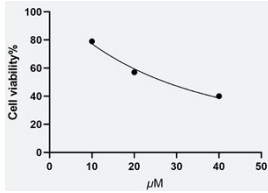

**6**

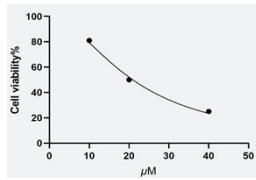

**8**

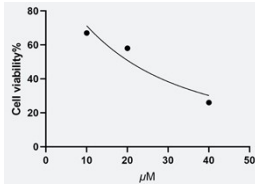

**9**

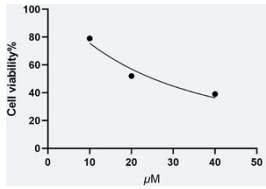

**10**

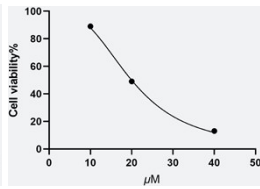

**11**

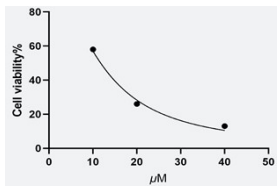

**12**

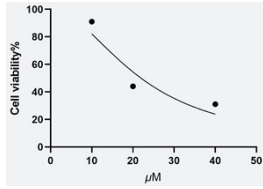

**13**

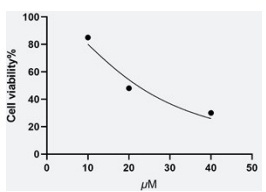

**14**

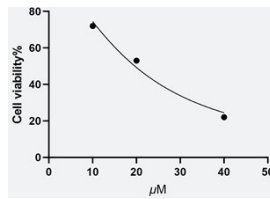

**16**

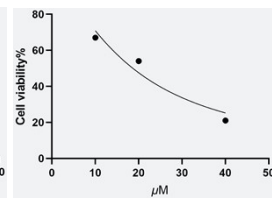

**17**

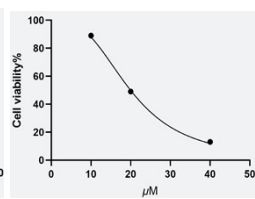

**18**

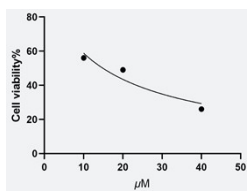

**19**

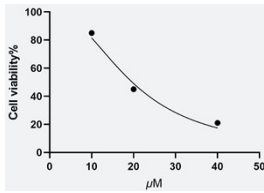

**20**

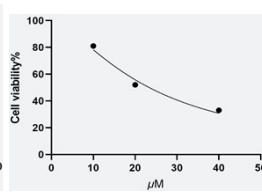

**21**

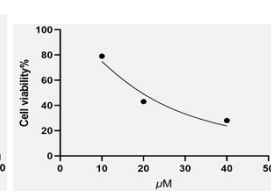

**22**

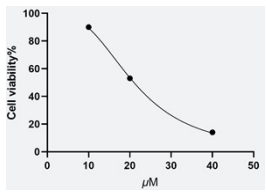

**24**

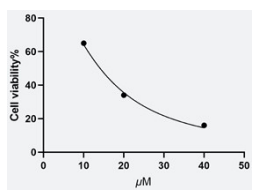

**25**

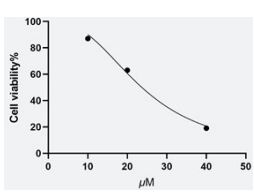

**26**

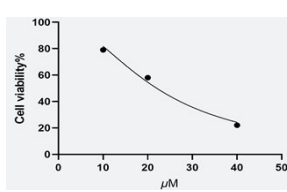

**27**

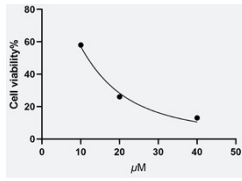

28

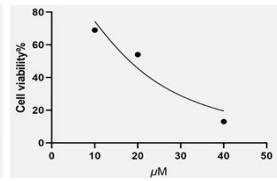

29

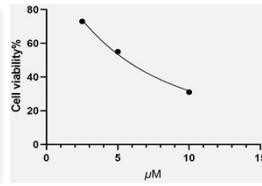

30

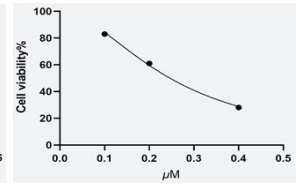

31

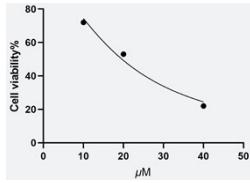

32

**Figure S92.** Inhibitory curve on K562 cells and THP-1 cells of **1-32**
